# Supplementary material for: A multi pathway coupled domino strategy: I2/TBHP-promoted synthesis of imidazopyridines and thiazoles via sp3, sp2 and sp C–H functionalization
Source: Royal Society of Chemistry journal article supplement (doi:10.1039/d1ra07438e), 2022-01-01

Electronic Supplementary Material (ESI) for RSC Advances.  
This journal is © The Royal Society of Chemistry 2021

## Supporting Information

### **A multi pathway coupled domino strategy: I<sub>2</sub>/TBHP-promoted synthesis of imidazopyridines and thiazoles via sp<sup>3</sup>, sp<sup>2</sup> and sp C–H functionalization**

Yishou Wang<sup>†</sup>, Shichen Li, Xinfeng Wang, Yiming Yao Lei Feng\* and Chen Ma\*

*School of Chemistry and Chemical Engineering, Shandong University, Jinan, 250100, P R China.*

|                                                             |     |
|-------------------------------------------------------------|-----|
| General.....                                                | S2  |
| General procedure for substrates .....                      | S2  |
| Screening of reaction parameters.....                       | S3  |
| Monitoring the reaction using GC-MS, HRMS.....              | S3  |
| Characterization Data of the Products.....                  | S4  |
| <sup>1</sup> H and <sup>13</sup> C spectra of products..... | S17 |

## 1. General

The Reagents and solvents are commercially purchased and used directly unless otherwise mentioned. All reactions were carried out in a sealed Schlenk tubes and monitored by TLC. Flash column chromatography was performed with silica gel (300–400 mesh).  $^1\text{H}$  and  $^{13}\text{C}$  NMR spectra were recorded on a Bruker Avance 400 instrument (400 MHz for  $^1\text{H}$  and 101 MHz for  $^{13}\text{C}$  NMR spectroscopy). Data were reported as chemical shifts in ppm relative to TMS (0.00 ppm) for  $^1\text{H}$  and  $\text{CDCl}_3$  (77.16 ppm) or  $\text{DMSO-}d_6$  (39.52 ppm) for  $^{13}\text{C}$ . HRMS spectra were measured on a Q-TOF instrument in positive-ion mode with an ESI ion source.

## 2. General procedure for substrates

Ethyl arenes or ethylene arenes or ethyne arenes (1.0 mmol),  $\text{I}_2$  (0.40 mmol), tert-butyl hydroperoxide (TBHP, 3.5 mmol, 70% aq. solution) were placed in a sealed tube equipped with a magnetic stirring bar. These mixtures were stirred and reacted at  $120^\circ\text{C}$  for 1-1.5 h. After disappearance of the reactant monitored by TLC, 2-aminopyridine (2.0mmol) and  $\text{CuCl}_2$  (0.5mmol) in DMF (3 ml) was added to the sealed tube at  $110^\circ\text{C}$  and heated for 2 h. After the reaction, 30 ml of saturated  $\text{Na}_2\text{S}_2\text{O}_3$  solution was added to the reaction solution to quench the remaining iodine. Then the solution was extracted with ethyl acetate (3 x 30 mL), dried over anhydrous  $\text{Na}_2\text{SO}_4$ , filtered and concentrated under reduced pressure. The residue was purified through silica gel eluting with ethyl acetate/hexanes to give the product.

### 3. Screening of reaction parameters <sup>a</sup>

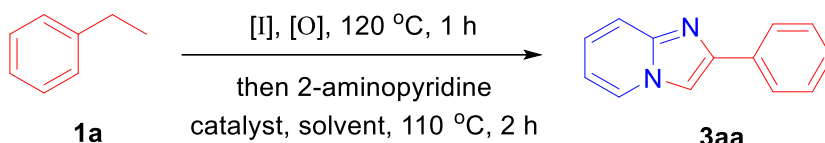

| Entry                                                  | [I]                  | [O]         | catalyst (equiv.)                                     | temperature   | solvent    | yield, % <sup>b</sup> |
|--------------------------------------------------------|----------------------|-------------|-------------------------------------------------------|---------------|------------|-----------------------|
| <b>Influence of the temperature (the first step)</b>   |                      |             |                                                       |               |            |                       |
| 1                                                      | I <sub>2</sub>       | TBHP        | CuCl <sub>2</sub> (0.5)                               | 140 °C        | DMF        | 74                    |
| <b>2</b>                                               | <b>I<sub>2</sub></b> | <b>TBHP</b> | <b>CuCl<sub>2</sub> (0.5)</b>                         | <b>120 °C</b> | <b>DMF</b> | <b>82</b>             |
| 3                                                      | I <sub>2</sub>       | TBHP        | CuCl <sub>2</sub> (0.5)                               | 100 °C        | DMF        | 54                    |
| 4                                                      | I <sub>2</sub>       | TBHP        | CuCl <sub>2</sub> (0.5)                               | 80 °C         | DMF        | 19                    |
| 5                                                      | I <sub>2</sub>       | TBHP        | CuCl <sub>2</sub> (0.5)                               | 60 °C         | DMF        | None                  |
| <b>Influence of the copper salt</b>                    |                      |             |                                                       |               |            |                       |
| 6                                                      | I <sub>2</sub>       | TBHP        | -                                                     | 120 °C        | DMF        | 33                    |
| 7                                                      | I <sub>2</sub>       | TBHP        | CuI (0.5)                                             | 120 °C        | DMF        | 41                    |
| 8                                                      | I <sub>2</sub>       | TBHP        | CuCl (0.5)                                            | 120 °C        | DMF        | 60                    |
| 9                                                      | I <sub>2</sub>       | TBHP        | CuSO <sub>4</sub> (0.5)                               | 120 °C        | DMF        | 47                    |
| <b>10</b>                                              | <b>I<sub>2</sub></b> | <b>TBHP</b> | <b>CuCl<sub>2</sub> (0.5)</b>                         | <b>120 °C</b> | <b>DMF</b> | <b>82</b>             |
| 11                                                     | I <sub>2</sub>       | TBHP        | Cu(OAc) <sub>2</sub> (0.5)                            | 120 °C        | DMF        | 57                    |
| 12                                                     | I <sub>2</sub>       | TBHP        | Cu(NO <sub>3</sub> ) <sub>2</sub> (0.5)               | 120 °C        | DMF        | Trace                 |
| <b>Influence of the equivalent of CuCl<sub>2</sub></b> |                      |             |                                                       |               |            |                       |
| 13                                                     | I <sub>2</sub>       | TBHP        | CuCl <sub>2</sub> (0.1)                               | 120 °C        | DMF        | 54                    |
| 14                                                     | I <sub>2</sub>       | TBHP        | CuCl <sub>2</sub> (0.1) + L <sub>1</sub> <sup>c</sup> | 120 °C        | DMF        | 75                    |
| 15                                                     | I <sub>2</sub>       | TBHP        | CuCl <sub>2</sub> (0.2)                               | 120 °C        | DMF        | 67                    |
| <b>16</b>                                              | <b>I<sub>2</sub></b> | <b>TBHP</b> | <b>CuCl<sub>2</sub> (0.5)</b>                         | <b>120 °C</b> | <b>DMF</b> | <b>82</b>             |
| 17                                                     | I <sub>2</sub>       | TBHP        | CuCl <sub>2</sub> (0.8)                               | 120 °C        | DMF        | 77                    |

<sup>a</sup> Reaction conditions: **1a** (1 mmol), [I] (0.4 mmol), [O] (3 mmol), 120 °C, 1 h; then 2-aminopyridine (2.0 mmol), CuCl<sub>2</sub> (0.5 mmol), solvent (3 mL), 110 °C, 2 h. <sup>b</sup> Isolated yield. <sup>c</sup> L<sub>1</sub> = 1,10-phenanthroline, 0.2 mmol.

### 4. Monitoring the reaction using GC-MS, HRMS

(1) The GC-MC image of ethylbenzene as raw material reacted for 20 minutes:

流路号:5 保留时间:9.515(扫描数:1304)  
质量峰:313  
原始模式:单个 9.515(1304) 基峰:105(206767)  
背景模式:9.185(1238) 组 1 - 事件 1 Q3 Scan

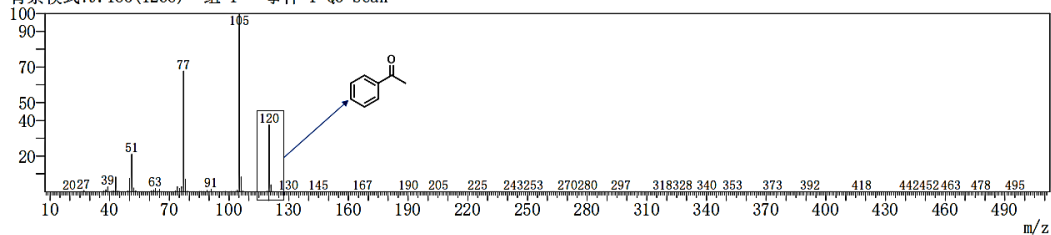

## (2) The HRMS image of $\alpha$ -iodo acetophenone (**1ab**)

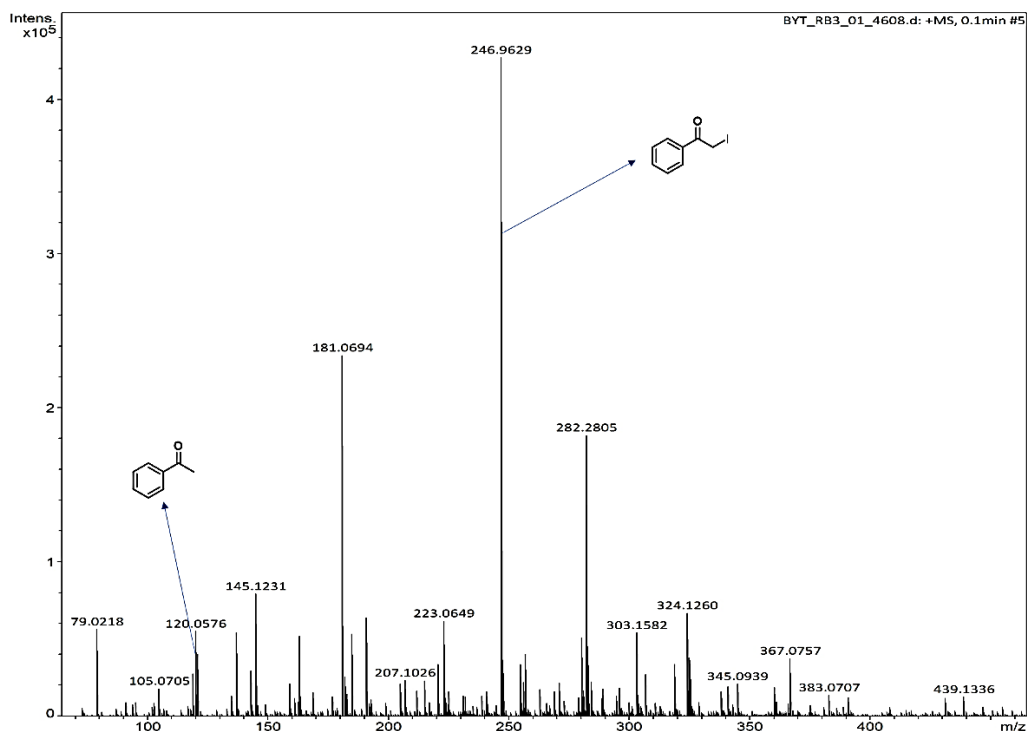

## 5. Characterization Data for the products

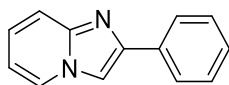

**3aa**

### 2-Phenylimidazo[1,2-a]pyridine

White solid was obtained in 82% isolated yield, mp 135-137 °C.

<sup>1</sup>H NMR (400 MHz, DMSO-*d*<sub>6</sub>)  $\delta$  8.53 (dt,  $J = 6.8, 1.2$  Hz, 1H), 8.40 (s, 1H), 8.02 – 7.94 (m, 2H), 7.59 (dd,  $J = 9.1, 1.0$  Hz, 1H), 7.45 (t,  $J = 7.6$  Hz, 2H), 7.37 – 7.29 (m, 1H), 7.25 (ddd,  $J = 9.1, 6.7, 1.3$  Hz, 1H), 6.90 (td,  $J = 6.7, 1.2$  Hz, 1H).

<sup>13</sup>C NMR (101 MHz, DMSO-*d*<sub>6</sub>)  $\delta$  145.29, 144.82, 134.39, 129.18, 128.17, 127.35, 126.04, 124.99, 117.11, 112.74, 109.57.

**HRMS** m/z (ESI): calcd. for  $[C_{13}H_{10}N_2+H]^+$  : 195.0917 Found: 195.0911

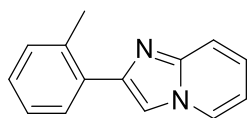

**3ba**

**2-(o-Tolyl)imidazo[1,2-a]pyridine**

White solid was obtained in 64% isolated yield, mp = 101-103 °C.

**<sup>1</sup>H NMR** (400 MHz, CDCl<sub>3</sub>) δ 6.68 (d, *J* = 6.8 Hz, 1H), 6.47 (d, *J* = 6.7 Hz, 1H), 6.40 – 6.10 (m, 2H), 5.83 (s, 3H), 5.80 – 5.59 (m, 1H), 5.33 (t, *J* = 6.7 Hz, 1H), 1.11 (s, 3H).

**<sup>13</sup>C NMR** (101 MHz, CDCl<sub>3</sub>) δ 145.24, 144.65, 135.77, 133.22, 130.92, 129.73, 127.81, 126.04, 125.57, 124.66, 117.51, 112.33, 110.78, 22.66.

**HRMS** m/z (ESI): calcd. for  $[C_{14}H_{12}N_2+H]^+$  : 209.1079 Found:209.1078

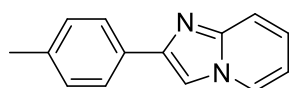

**3ca**

**2-(p-Tolyl)imidazo[1,2-a]pyridine**

White solid was obtained in 85% isolated yield, mp 144-145 °C.

**<sup>1</sup>H NMR** (400 MHz, CDCl<sub>3</sub>) δ 8.01 (d, *J* = 6.7 Hz, 1H), 7.83 (d, *J* = 8.2 Hz, 2H), 7.75 (s, 1H), 7.60 (d, *J* = 9.1 Hz, 1H), 7.23 (d, *J* = 7.9 Hz, 2H), 7.11 (ddd, *J* = 9.1, 6.8, 1.3 Hz, 1H), 6.69 (td, *J* = 6.7, 1.2 Hz, 1H), 2.37 (s, 3H).

**<sup>13</sup>C NMR** (101 MHz, CDCl<sub>3</sub>) δ 145.85, 145.59, 137.79, 130.95, 129.45, 125.93, 125.55, 124.52, 117.37, 112.28, 107.80, 21.33.

**HRMS** m/z (ESI): calcd. for  $[C_{14}H_{12}N_2+H]^+$  :209.1079 Found:209.1079

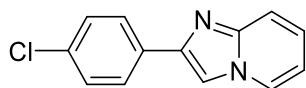

**3da**

**2-(4-Chlorophenyl)imidazo[1,2-a]pyridine**

White solid was obtained in 84% isolated yield, mp 202-205 °C.

**<sup>1</sup>H NMR** (400 MHz, CDCl<sub>3</sub>) δ 8.10 – 7.91 (m, 2H), 7.80 – 7.70 (m, 2H), 7.53 (d, *J* = 9.1 Hz, 1H), 7.35 (d, *J* = 8.9 Hz, 1H), 7.20 (t, *J* = 7.9 Hz, 1H), 7.13 – 7.05 (m, 1H), 6.69 (t, *J* = 6.8 Hz, 1H).

**<sup>13</sup>C NMR** (101 MHz, CDCl<sub>3</sub>) δ 144.65, 143.58, 132.68, 131.18, 127.89, 126.23, 124.59, 123.98, 116.52, 111.64, 107.16.

**HRMS** *m/z* (ESI): calcd. for [C<sub>13</sub>H<sub>9</sub>ClN<sub>2</sub>+H]<sup>+</sup> :229.0533 Found:229.0524

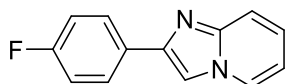

**3ea**

**2-(4-Fluorophenyl)imidazo[1,2-a]pyridine**

White solid was obtained in 78% isolated yield, mp 163-165 °C.

**<sup>1</sup>H NMR** (600 MHz, DMSO-*d*<sub>6</sub>) δ 9.25 – 9.21 (m, 1H), 8.77 (s, 1H), 8.02 – 7.94 (m, 4H), 7.61 (dd, *J* = 8.4, 6.9 Hz, 2H), 7.58 – 7.52 (m, 1H).

**<sup>13</sup>C NMR** (151 MHz, DMSO-*d*<sub>6</sub>) δ 138.85, 136.65, 132.35, 129.78, 128.88, 128.68, 126.32, 126.28, 125.66, 122.61, 112.98, 110.77.

**HRMS** *m/z* (ESI): calcd. for [C<sub>13</sub>H<sub>9</sub>FN<sub>2</sub>+H]<sup>+</sup> :213.0829 Found:213.0813

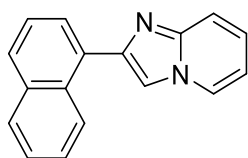

**3fa**

**2-(Naphthalen-1-yl)imidazo[1,2-a]pyridine**

White solid was obtained in 91% isolated yield, mp = 158-160 °C.

**<sup>1</sup>H NMR** (600 MHz, CDCl<sub>3</sub>) δ 8.46 (dd, *J* = 1.7, 0.8 Hz, 1H), 8.07 (dt, *J* = 6.8, 1.2 Hz, 1H), 7.93 (dd, *J* = 8.5, 1.7 Hz, 1H), 7.90 (d, *J* = 0.7 Hz, 1H), 7.88 – 7.84 (m, 1H), 7.82 (d, *J* = 8.5 Hz, 1H), 7.80 – 7.74 (m, 1H), 7.64 (dq, *J* = 9.1, 1.0 Hz, 1H), 7.46 – 7.37 (m, 2H), 7.14 (ddd, *J* = 9.1, 6.7, 1.3 Hz, 1H), 6.73 (td, *J* = 6.7, 1.2 Hz, 1H).

**<sup>13</sup>C NMR** (151 MHz, CDCl<sub>3</sub>) δ 145.54, 145.27, 133.73, 133.29, 130.51, 128.43, 128.39, 127.72, 126.35, 126.09, 125.70, 125.29, 124.96, 124.10, 117.36, 112.80, 108.60.

**HRMS** *m/z* (ESI): calcd. for [C<sub>17</sub>H<sub>12</sub>N<sub>2</sub>+H]<sup>+</sup> :245.1079 Found:245.1060

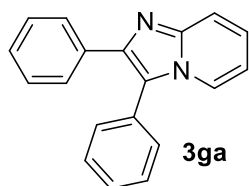

**2,3-Diphenylimidazo[1,2-a]pyridine**

White solid was obtained in 43% isolated yield, mp = 149-151 °C.

**<sup>1</sup>H NMR** (400 MHz, CDCl<sub>3</sub>) δ 7.95 (d, *J* = 6.9 Hz, 1H), 7.68 (t, *J* = 7.7 Hz, 3H), 7.57 – 7.40 (m, 5H), 7.34 – 7.14 (m, 4H), 6.72 (t, *J* = 6.8 Hz, 1H).

**<sup>13</sup>C NMR** (101 MHz, CDCl<sub>3</sub>) δ 144.78, 142.33, 134.11, 130.74, 129.84, 129.58, 128.93, 128.30, 128.12, 127.52, 124.78, 123.31, 121.10, 117.53, 112.34.

**HRMS** m/z (ESI): calcd. for [C<sub>19</sub>H<sub>14</sub>N<sub>2</sub>+H]<sup>+</sup>: 271.1236 Found: 271.1231

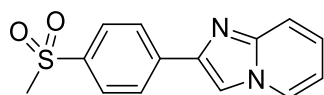

**2-(4-(Methylsulfonyl)phenyl)imidazo[1,2-a]pyridine**

White solid was obtained in 73% isolated yield, mp = 242-244 °C.

**<sup>1</sup>H NMR** (400 MHz, CDCl<sub>3</sub>) δ 8.21 – 8.13 (m, 3H), 8.05 – 7.96 (m, 3H), 7.67 (d, *J* = 9.2 Hz, 1H), 7.25 (ddd, *J* = 9.1, 6.7, 1.3 Hz, 1H), 6.85 (td, *J* = 6.8, 1.2 Hz, 1H), 3.11 (s, 3H).

**<sup>13</sup>C NMR** (101 MHz, CDCl<sub>3</sub>) δ 145.98, 143.57, 139.28, 139.26, 127.94, 126.60, 125.86, 125.57, 117.87, 113.11, 109.69, 44.64.

**HRMS** m/z (ESI): calcd. for [C<sub>14</sub>H<sub>12</sub>N<sub>2</sub>O<sub>2</sub>S+H]<sup>+</sup>: 273.0698 Found: 273.0680

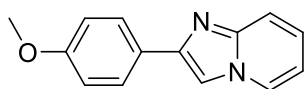

**2-(4-Methoxyphenyl)imidazo[1,2-a]pyridine**

White solid was obtained in 89% isolated yield, mp = 133-135 °C.

**<sup>1</sup>H NMR** (600 MHz, CDCl<sub>3</sub>) δ 7.95 (dq, *J* = 6.7, 1.1 Hz, 1H), 7.81 – 7.76 (m, 2H), 7.65 – 7.61 (m, 1H), 7.51 (dt, *J* = 9.1, 1.1 Hz, 1H), 7.03 (ddt, *J* = 9.2, 6.7, 1.3 Hz, 1H), 6.90 – 6.84 (m, 2H), 6.62 (tt, *J* = 6.7, 1.4 Hz, 1H), 3.74 (d, *J* = 1.0 Hz, 3H).

**<sup>13</sup>C NMR** (151 MHz, CDCl<sub>3</sub>) δ 159.61, 145.63, 145.57, 127.31, 126.44, 125.49, 124.50, 117.20, 114.15, 112.25, 107.26, 55.31.

**HRMS** m/z (ESI): calcd. for [C<sub>14</sub>H<sub>12</sub>N<sub>2</sub>O+H]<sup>+</sup> :225.1029 Found :225.1029

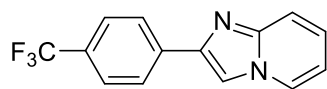

**3ja**

**2-(4-(Trifluoromethyl)phenyl)imidazo[1,2-a]pyridine**

White solid was obtained in 87% isolated yield, mp = 196-198 °C.

**<sup>1</sup>H NMR** (400 MHz, CDCl<sub>3</sub>) δ 6.68 – 6.56 (m, 3H), 6.44 (s, 1H), 6.20 (d, *J* = 8.2 Hz, 3H), 5.76 (dd, *J* = 15.4, 8.7 Hz, 1H), 5.34 (d, *J* = 6.7 Hz, 1H).

**<sup>13</sup>C NMR** (101 MHz, CDCl<sub>3</sub>) δ 145.65, 143.91, 136.91, 129.97, 129.64, 126.16, 125.75 (q, *J*=4.4 Hz), 125.54, 122.90, 117.62, 113.05, 109.05.

**HRMS** m/z (ESI): calcd. for [C<sub>14</sub>H<sub>9</sub>F<sub>3</sub>N<sub>2</sub>+H]<sup>+</sup> :263.0797 Found :263.0794

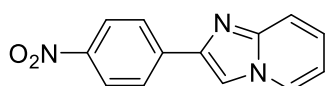

**3ka**

**2-(4-Nitrophenyl)imidazo[1,2-a]pyridine**

Yellow solid was obtained in 85% isolated yield, mp = 258-261 °C.

**<sup>1</sup>H NMR** (600 MHz, DMSO-*d*<sub>6</sub>) δ 8.65 (d, *J* = 0.7 Hz, 1H), 8.58 (dt, *J* = 6.8, 1.3 Hz, 1H), 8.34 – 8.29 (m, 2H), 8.26 – 8.21 (m, 2H), 7.63 (dt, *J* = 9.1, 1.0 Hz, 1H), 7.31 (ddd, *J* = 9.1, 6.7, 1.3 Hz, 1H), 6.96 (td, *J* = 6.8, 1.2 Hz, 1H).

**<sup>13</sup>C NMR** (151 MHz, DMSO-*d*<sub>6</sub>) δ 146.96, 145.73, 142.47, 140.99, 127.74, 126.78, 126.40, 124.67, 117.47, 113.41, 112.17.

**HRMS** m/z (ESI): calcd. for [C<sub>13</sub>H<sub>9</sub>N<sub>3</sub>O<sub>2</sub>+H]<sup>+</sup> :240.0774 Found:240.0766

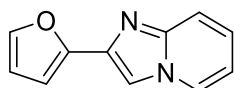

**3la**

**2-(Furan-2-yl)imidazo[1,2-a]pyridine**

White solid was obtained in 81% isolated yield, mp = 88-90 °C.

**<sup>1</sup>H NMR** (400 MHz, CDCl<sub>3</sub>) δ 7.98 (dt, *J* = 6.8, 1.3 Hz, 1H), 7.68 (s, 1H), 7.50 (d, *J* = 9.0 Hz, 1H), 7.38 (d, *J* = 1.1 Hz, 1H), 7.07 (ddd, *J* = 9.2, 6.8, 1.3 Hz, 1H), 6.81 (d, *J* = 2.6 Hz, 1H), 6.66 (td, *J* = 6.8, 1.2 Hz, 1H), 6.42 (dd, *J* = 3.4, 1.8 Hz, 1H).



<sup>13</sup>C NMR (101 MHz, CDCl<sub>3</sub>) δ 148.57, 144.53, 141.02, 136.88, 124.63, 123.95, 116.30, 111.49, 110.56, 106.83, 105.65.

HRMS m/z (ESI): calcd. for [C<sub>11</sub>H<sub>8</sub>N<sub>2</sub>O+H]<sup>+</sup> :185.0716 Found:185.0696

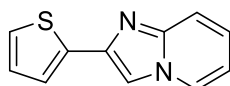

**3ma**

**2-(Thiophen-2-yl)imidazo[1,2-a]pyridine**

White solid was obtained in 76% isolated yield, mp = 136-138 °C.

<sup>1</sup>H NMR (600 MHz, CDCl<sub>3</sub>) δ 7.84 (dt, *J* = 6.7, 1.2 Hz, 1H), 7.54 (d, *J* = 0.7 Hz, 1H), 7.44 (dq, *J* = 9.1, 1.0 Hz, 1H), 7.31 (dd, *J* = 3.6, 1.2 Hz, 1H), 7.16 (dd, *J* = 5.0, 1.2 Hz, 1H), 6.99 – 6.91 (m, 2H), 6.55 (td, *J* = 6.7, 1.2 Hz, 1H).

<sup>13</sup>C NMR (151 MHz, CDCl<sub>3</sub>) δ 145.35, 140.71, 137.55, 127.78, 125.50, 125.02, 124.86, 123.69, 117.10, 112.51, 107.50.

HRMS m/z (ESI): calcd. for [C<sub>11</sub>H<sub>8</sub>N<sub>2</sub>S+H]<sup>+</sup> :201.0487 Found:201.0468

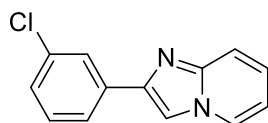

**3na**

**2-(3-Chlorophenyl)imidazo[1,2-a]pyridine**

White solid was obtained in 62% isolated yield, mp = 107-109 °C.

<sup>1</sup>H NMR (600 MHz, CDCl<sub>3</sub>) δ 8.05 (dt, *J* = 6.8, 1.2 Hz, 1H), 7.89 (t, *J* = 1.9 Hz, 1H), 7.78 (d, *J* = 0.7 Hz, 1H), 7.76 (dt, *J* = 7.7, 1.4 Hz, 1H), 7.58 (dq, *J* = 9.1, 1.0 Hz, 1H), 7.29 (t, *J* = 7.8 Hz, 1H), 7.22 (ddd, *J* = 7.9, 2.1, 1.1 Hz, 1H), 7.13 (ddd, *J* = 9.1, 6.7, 1.3 Hz, 1H), 6.74 (td, *J* = 6.7, 1.2 Hz, 1H).

<sup>13</sup>C NMR (151 MHz, CDCl<sub>3</sub>) δ 145.55, 144.14, 135.33, 134.79, 130.03, 128.03, 126.13, 125.73, 125.30, 124.14, 117.55, 112.89, 108.55.

HRMS m/z (ESI): calcd. for [C<sub>13</sub>H<sub>9</sub>ClN<sub>2</sub>+H]<sup>+</sup> :229.0533 Found:229.0516

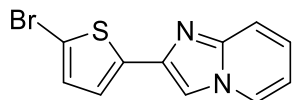

**30a**

**2-(5-Bromothiophen-2-yl)imidazo[1,2-a]pyridine**

White solid was obtained in 68% isolated yield, mp = 140-142 °C.

**<sup>1</sup>H NMR** (400 MHz, CDCl<sub>3</sub>) δ 6.60 (d, *J* = 6.8 Hz, 1H), 6.38 – 6.08 (m, 2H), 5.89 – 5.69 (m, 2H), 5.55 (d, *J* = 3.8 Hz, 1H), 5.33 (t, *J* = 6.7 Hz, 1H).

**<sup>13</sup>C NMR** (101 MHz, CDCl<sub>3</sub>) δ 145.14, 139.49, 138.49, 137.85, 130.72, 125.61, 124.23, 117.16, 113.09, 112.16, 107.42.

**HRMS** m/z (ESI): calcd. for [C<sub>11</sub>H<sub>7</sub>BrN<sub>2</sub>S+H]<sup>+</sup> :278.9592 Found:278.9573

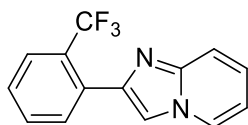

**3pa**

**2-(2-(Trifluoromethyl)phenyl)imidazo[1,2-a]pyridine**

White solid was obtained in 43% isolated yield, mp: 90-92 °C.

**<sup>1</sup>H NMR** (400 MHz, CDCl<sub>3</sub>) δ 8.05 (dt, *J* = 6.8, 1.2 Hz, 1H), 7.91 (d, *J* = 7.4 Hz, 1H), 7.73 (s, 1H), 7.68 (d, *J* = 6.6 Hz, 1H), 7.59 – 7.52 (m, 2H), 7.38 (t, *J* = 7.7 Hz, 1H), 7.11 (ddd, *J* = 9.1, 6.8, 1.3 Hz, 1H), 6.72 (td, *J* = 6.8, 1.2 Hz, 1H).

**<sup>13</sup>C NMR** (101 MHz, CDCl<sub>3</sub>) δ 143.72, 141.27, 132.25, 131.55, 130.72, 126.78, 126.45, 125.05(q, *J* = 5.8 Hz), 124.68, 123.89, 121.96, 116.67, 111.58, 110.41.

**HRMS** m/z (ESI): calcd. for [C<sub>14</sub>H<sub>9</sub>F<sub>3</sub>N<sub>2</sub>+H]<sup>+</sup> :263.0797 Found:263.0796

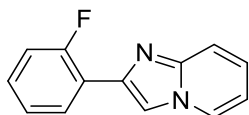

**3qa**

**2-(2-Fluorophenyl)imidazo[1,2-a]pyridine**

White solid was obtained in 67% isolated yield, mp: 94-97 °C.

**<sup>1</sup>H NMR** (400 MHz, CDCl<sub>3</sub>) δ 8.29 (td, *J* = 7.6, 2.7 Hz, 1H), 8.04 (dt, *J* = 6.8, 1.2 Hz, 1H), 7.97 (d, *J* = 3.9 Hz, 1H), 7.56 (dd, *J* = 9.1, 1.0 Hz, 1H), 7.27 – 7.15 (m, 2H), 7.13 – 7.03 (m, 2H), 6.70 (td, *J* = 6.8, 1.2 Hz, 1H).

**<sup>13</sup>C NMR** (101 MHz, CDCl<sub>3</sub>) δ 160.51, 158.04, 143.77, 138.07, 127.85 (*J* = 8.6 Hz), 124.71, 123.98, 123.47 (*J* = 3.3 Hz), 120.42 (*J* = 12.2 Hz), 116.39, 114.62 (*J* = 22.1 Hz), 111.46, 111.06 (*J* = 15.2 Hz).

**HRMS** *m/z* (ESI): calcd. for [C<sub>13</sub>H<sub>9</sub>FN<sub>2</sub>+H]<sup>+</sup> :213.0829 Found:213.0826

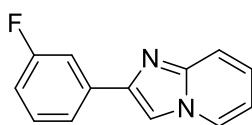

**3a**

**2-(3-Fluorophenyl)imidazo[1,2-a]pyridine**

White solid was obtained in 65% isolated yield, mp = 101-103 °C.

**<sup>1</sup>H NMR** (400 MHz, CDCl<sub>3</sub>) δ 8.09 (dt, *J* = 6.8, 1.2 Hz, 1H), 7.83 (s, 1H), 7.77 – 7.57 (m, 3H), 7.38 (td, *J* = 8.0, 5.9 Hz, 1H), 7.17 (ddd, *J* = 9.1, 6.8, 1.3 Hz, 1H), 7.01 (tdd, *J* = 8.4, 2.7, 1.0 Hz, 1H), 6.78 (td, *J* = 6.8, 1.2 Hz, 1H).

**<sup>13</sup>C NMR** (101 MHz, CDCl<sub>3</sub>) δ 164.49, 162.05, 145.65, 144.56 (*J* = 2.8 Hz), 136.06 (*J* = 8.3 Hz), 130.21 (*J* = 8.3 Hz), 125.66, 125.01, 121.58 (*J* = 2.9 Hz), 117.61, 114.71 (*J* = 21.4 Hz), 112.80 (*J* = 22.1 Hz), 108.54.

**HRMS** *m/z* (ESI): calcd. for [C<sub>13</sub>H<sub>9</sub>FN<sub>2</sub>+H]<sup>+</sup> :213.0829 Found:213.0818

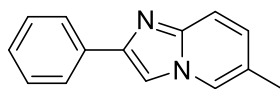

**3ab**

**6-Methyl-2-phenylimidazo[1,2-a]pyridine**

White solid was obtained in 74% isolated yield, mp: 176-177 °C.

**<sup>1</sup>H NMR** (600 MHz, CDCl<sub>3</sub>) δ 7.89 – 7.84 (m, 2H), 7.81 (dq, *J* = 2.1, 1.1 Hz, 1H), 7.68 (d, *J* = 0.7 Hz, 1H), 7.47 (d, *J* = 9.1 Hz, 1H), 7.38 – 7.32 (m, 2H), 7.27 – 7.21 (m, 1H), 6.94 (dd, *J* = 9.2, 1.7 Hz, 1H), 2.23 (d, *J* = 1.1 Hz, 3H).

**<sup>13</sup>C NMR** (151 MHz, CDCl<sub>3</sub>) δ 145.30, 144.63, 133.71, 128.72, 128.03, 127.89, 125.96, 123.35, 122.19, 116.76, 107.86, 18.12.

**HRMS** m/z (ESI): calcd. for  $[C_{14}H_{12}N_2+H]^+$  :209.1079 Found:209.1074

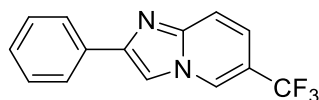

**3ac**

**2-Phenyl-6-(trifluoromethyl)imidazo[1,2-a]pyridine**

White solid was obtained in 67% isolated yield, mp: 165-166 °C.

**<sup>1</sup>H NMR** (400 MHz, CDCl<sub>3</sub>) δ 8.42 (s, 1H), 7.88 (dd, *J* = 9.8, 1.6 Hz, 3H), 7.66 (d, *J* = 9.5 Hz, 1H), 7.39 (t, *J* = 7.5 Hz, 2H), 7.33 – 7.22 (m, 2H).

**<sup>13</sup>C NMR** (101 MHz, CDCl<sub>3</sub>) δ 146.69, 144.26, 131.81, 127.86, 127.63, 125.21, 123.55 (q, *J* = 5.9 Hz), 121.15, 119.61 (q, *J* = 2.7 Hz), 117.10, 115.74, 108.19.

**HRMS** m/z (ESI): calcd. for  $[C_{14}H_9F_3N_2+H]^+$  :263.0797 Found:263.0794

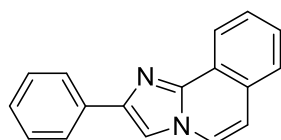

**3ad**

**2-Phenylimidazo[2,1-a]isoquinoline**

White solid was obtained in 62% isolated yield, mp = 144-146 °C.

**<sup>1</sup>H NMR** (400 MHz, CDCl<sub>3</sub>) δ 8.74 (d, *J* = 7.9 Hz, 1H), 8.01 (d, *J* = 6.8 Hz, 2H), 7.86 (d, *J* = 7.2 Hz, 1H), 7.79 (s, 1H), 7.70 – 7.60 (m, 2H), 7.59 – 7.52 (m, 1H), 7.45 (t, *J* = 7.7 Hz, 2H), 7.32 (t, *J* = 7.3 Hz, 1H), 7.00 (d, *J* = 7.2 Hz, 1H).

**<sup>13</sup>C NMR** (101 MHz, CDCl<sub>3</sub>) δ 143.97, 143.28, 133.95, 129.51, 128.76, 128.20, 128.15, 127.65, 126.97, 125.89, 123.80, 123.55, 122.97, 113.17, 109.88.

**HRMS** m/z (ESI): calcd. for  $[C_{17}H_{12}N_2+H]^+$  :245.1079 Found:245.1072

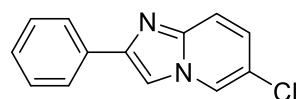

**3ae**

**6-Chloro-2-phenylimidazo[1,2-a]pyridine**

White solid was obtained in 63% isolated yield, mp = 206-209 °C.

**<sup>1</sup>H NMR** (600 MHz, DMSO-*d*<sub>6</sub>) δ 9.25 – 9.21 (m, 1H), 8.77 (s, 1H), 8.02 – 7.98 (m, 3H), 7.96 (dd, *J* = 9.5, 1.9 Hz, 1H), 7.61 (dd, *J* = 8.4, 6.9 Hz, 2H), 7.58 – 7.52 (m, 1H).

**<sup>13</sup>C NMR** (151 MHz, DMSO-*d*<sub>6</sub>) δ 138.85, 136.65, 132.35, 129.78, 128.88, 126.32, 126.28, 125.66, 122.61, 112.98, 110.77.

**HRMS** *m/z* (ESI): calcd. for [C<sub>13</sub>H<sub>9</sub>ClN<sub>2</sub>+H]<sup>+</sup> :229.0533 Found:229.0525

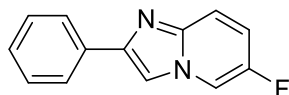

**3af**

**6-Fluoro-2-phenylimidazo[1,2-a]pyridine**

White solid was obtained in 75% isolated yield, mp = 186-189 °C.

**<sup>1</sup>H NMR** (400 MHz, CDCl<sub>3</sub>) δ 7.97 – 7.90 (m, 1H), 7.83 (d, *J* = 6.9 Hz, 2H), 7.74 (s, 1H), 7.56 (dd, *J* = 9.8, 5.1 Hz, 1H), 7.41 – 7.17 (m, 3H), 7.00 (ddd, *J* = 10.2, 8.0, 2.4 Hz, 1H).

**<sup>13</sup>C NMR** (101 MHz, CDCl<sub>3</sub>) δ 152.27(*J* = 237 Hz), 151.10, 145.83, 142.27, 132.16, 127.77, 127.21, 124.97, 116.25(*J* = 118 Hz), 111.18(*J* = 41 Hz), 108.49.

**HRMS** *m/z* (ESI): calcd. for [C<sub>13</sub>H<sub>9</sub>FN<sub>2</sub>+H]<sup>+</sup> :213.0829 Found:213.0830

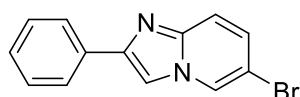

**3ag**

**6-Bromo-2-phenylimidazo[1,2-a]pyridine**

White solid was obtained in 68% isolated yield, mp = 184-186 °C.

**<sup>1</sup>H NMR** (400 MHz, CDCl<sub>3</sub>) δ 8.19 (s, 1H), 7.86 (d, *J* = 7.0 Hz, 2H), 7.75 (s, 1H), 7.49 (d, *J* = 9.6 Hz, 1H), 7.37 (t, *J* = 8.0 Hz, 2H), 7.28 (t, *J* = 7.4 Hz, 1H), 7.17 (dd, *J* = 9.5, 1.8 Hz, 1H).

**<sup>13</sup>C NMR** (101 MHz, CDCl<sub>3</sub>) δ 145.31, 142.88, 131.86, 127.81, 127.40, 127.34, 125.08, 123.41, 116.98, 107.25, 106.53.

**HRMS** *m/z* (ESI): calcd. for [C<sub>13</sub>H<sub>9</sub>BrN<sub>2</sub>+H]<sup>+</sup> :273.0028 Found:273.0031

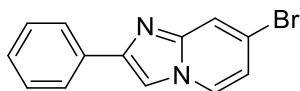

**3ah**

**7-Bromo-2-phenylimidazo[1,2-a]pyridine**

White solid was obtained in 63% isolated yield, mp = 180-182 °C.

**<sup>1</sup>H NMR** (400 MHz, CDCl<sub>3</sub>) δ 7.92 (d, *J* = 7.4 Hz, 1H), 7.89 – 7.83 (m, 2H), 7.77 (d, *J* = 3.7 Hz, 2H), 7.37 (t, *J* = 7.5 Hz, 2H), 7.32 – 7.17 (m, 1H), 6.83 (dd, *J* = 7.1, 1.9 Hz, 1H).

**<sup>13</sup>C NMR** (101 MHz, CDCl<sub>3</sub>) δ 145.20, 144.52, 131.81, 127.81, 127.40, 125.08, 124.75, 118.57, 117.63, 115.56, 107.26.

**HRMS** *m/z* (ESI): calcd. for [C<sub>13</sub>H<sub>9</sub>BrN<sub>2</sub>+H]<sup>+</sup> :273.0028 Found:273.0030

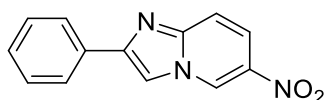

**3ai**

**6-Nitro-2-phenylimidazo[1,2-a]pyridine**

Yellow solid was obtained in 57% isolated yield, mp 171-173 °C.

**<sup>1</sup>H NMR** (400 MHz, DMSO-*d*<sub>6</sub>) δ 9.84 (d, *J* = 2.3 Hz, 1H), 8.63 (s, 1H), 8.01 (d, *J* = 6.9 Hz, 2H), 7.96 (dd, *J* = 9.9, 2.3 Hz, 1H), 7.75 (d, *J* = 9.9 Hz, 1H), 7.54 – 7.45 (m, 2H), 7.40 (t, *J* = 7.3 Hz, 1H)

**<sup>13</sup>C NMR** (101 MHz, DMSO-*d*<sub>6</sub>) δ 147.91, 145.46, 136.97, 133.16, 129.44, 129.15, 128.55, 126.40, 119.54, 116.52, 112.16.

**HRMS** *m/z* (ESI): calcd. for [C<sub>13</sub>H<sub>9</sub>N<sub>3</sub>O<sub>2</sub>+H]<sup>+</sup> :240.0774 Found:240.0769

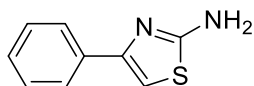

**3aj**

**4-Phenylthiazol-2-amine**

White solid was obtained in 79% isolated yield, mp 147-149 °C.

**<sup>1</sup>H NMR** (400 MHz, CDCl<sub>3</sub>) δ 7.73 – 7.65 (m, 2H), 7.31 (dd, *J* = 8.3, 6.7 Hz, 2H), 7.26 – 7.16 (m, 1H), 6.64 (s, 1H), 5.22 (s, 2H).

$^{13}\text{C}$  NMR (101 MHz,  $\text{CDCl}_3$ )  $\delta$  166.42, 150.10, 133.53, 127.58, 126.73, 124.95, 101.70.

HRMS  $m/z$  (ESI): calcd. for  $[\text{C}_9\text{H}_8\text{N}_2\text{S}+\text{H}]^+$  :177.0487 Found:177.0479

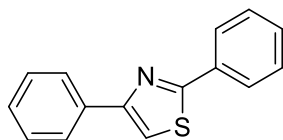

**3ak**

### 2,4-Diphenylthiazole

White solid was obtained in 86% isolated yield, mp 101-104 °C.

$^1\text{H}$  NMR (400 MHz,  $\text{CDCl}_3$ )  $\delta$  8.00 – 7.89 (m, 4H), 7.36 (m,  $J = 7.9, 5.8$  Hz, 6H), 7.30 – 7.24 (m, 1H).

$^{13}\text{C}$  NMR (101 MHz,  $\text{CDCl}_3$ )  $\delta$  167.90, 156.31, 134.55, 133.79, 130.08, 128.96, 128.78, 128.21, 126.65, 126.49, 112.66.

HRMS  $m/z$  (ESI): calcd. for  $[\text{C}_{15}\text{H}_{11}\text{NS}+\text{H}]^+$  :238.0688 Found:238.0680

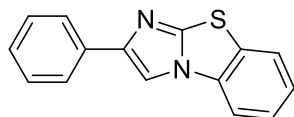

**3al**

### 2-Phenylbenzo[d]imidazo[2,1-b]thiazole

White solid was obtained in 82% isolated yield, mp 142-146 °C.

$^1\text{H}$  NMR (400 MHz,  $\text{CDCl}_3$ )  $\delta$  7.86 (s, 1H), 7.79 (d,  $J = 7.0$  Hz, 2H), 7.60 (d,  $J = 8.1$  Hz, 1H), 7.50 (d,  $J = 9.2$  Hz, 1H), 7.39 – 7.29 (m, 3H), 7.28 – 7.15 (m, 2H).

$^{13}\text{C}$  NMR (101 MHz,  $\text{CDCl}_3$ )  $\delta$  147.03, 146.57, 132.74, 131.08, 129.21, 127.69, 126.48, 125.14, 124.13, 123.82, 123.33, 111.59, 105.81.

HRMS  $m/z$  (ESI): calcd. for  $[\text{C}_{15}\text{H}_{10}\text{N}_2\text{S}+\text{H}]^+$  :251.0644 Found:251.0639

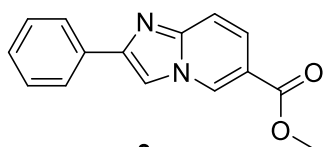

**3am**

### Methyl 2-phenylimidazo[1,2-a]pyridine-6-carboxylate

White solid was obtained in 55% isolated yield, mp 174-175 °C.

**<sup>1</sup>H NMR** (400 MHz, CDCl<sub>3</sub>) δ 8.81 (dd, *J* = 1.7, 1.0 Hz, 1H), 7.92 – 7.85 (m, 2H), 7.83 (s, 1H), 7.64 (dd, *J* = 9.4, 1.7 Hz, 1H), 7.55 (d, *J* = 9.4 Hz, 1H), 7.37 (dd, *J* = 8.2, 6.7 Hz, 2H), 7.32 – 7.25 (m, 1H), 3.88 (s, 3H).

**<sup>13</sup>C NMR** (101 MHz, CDCl<sub>3</sub>) δ 164.27, 146.53, 145.04, 131.96, 128.74, 127.80, 127.50, 125.17, 123.38, 115.66, 115.48, 107.91, 51.43.

**HRMS** *m/z* (ESI): calcd. for [C<sub>15</sub>H<sub>12</sub>N<sub>2</sub>O<sub>2</sub>+H]<sup>+</sup> :253.0978 Found:253.0976

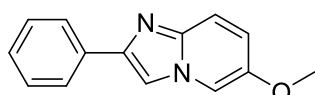

**3an**

**6-Methoxy-2-phenylimidazo[1,2-a]pyridine**

White solid was obtained in 81% isolated yield, mp 102-105 °C.

**<sup>1</sup>H NMR** (400 MHz, CDCl<sub>3</sub>) δ 7.85 (d, *J* = 7.1 Hz, 2H), 7.73 (s, 1H), 7.57 (d, *J* = 2.3 Hz, 1H), 7.47 (d, *J* = 9.8 Hz, 1H), 7.36 (t, *J* = 7.7 Hz, 2H), 7.21 (d, *J* = 14.2 Hz, 1H), 6.90 (dd, *J* = 9.7, 2.4 Hz, 1H), 3.75 (s, 3H).

**<sup>13</sup>C NMR** (101 MHz, CDCl<sub>3</sub>) δ 148.36, 141.59, 132.57, 129.90, 127.71, 126.82, 124.77, 119.04, 116.53, 108.17, 106.40, 55.15.

**HRMS** *m/z* (ESI): calcd. for [C<sub>14</sub>H<sub>12</sub>N<sub>2</sub>O+H]<sup>+</sup> :225.1029 Found:225.1034

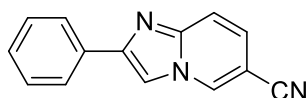

**3ao**

**2-Phenylimidazo[1,2-a]pyridine-6-carbonitrile**

White solid was obtained in 51% isolated yield, mp 240-243 °C.

**<sup>1</sup>H NMR** (600 MHz, CDCl<sub>3</sub>) δ 8.50 (t, *J* = 1.3 Hz, 1H), 7.92 – 7.86 (m, 3H), 7.65 (d, *J* = 9.3 Hz, 1H), 7.40 (dd, *J* = 8.4, 6.9 Hz, 2H), 7.35 – 7.29 (m, 1H), 7.22 (dd, *J* = 9.3, 1.7 Hz, 1H).

**<sup>13</sup>C NMR** (151 MHz, CDCl<sub>3</sub>) δ 148.21, 144.69, 132.26, 131.52, 129.06, 128.99, 126.38, 124.72, 118.39, 116.47, 108.97, 98.83.

**HRMS** *m/z* (ESI): calcd. for [C<sub>14</sub>H<sub>9</sub>N<sub>3</sub>+H]<sup>+</sup> :220.0875 Found:220.0869



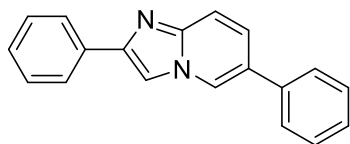

**3ap**

**2,6-Diphenylimidazo[1,2-a]pyridine**

White solid was obtained in 66% isolated yield, mp 178-180 °C.

**<sup>1</sup>H NMR** (400 MHz, CDCl<sub>3</sub>) δ 9.98 (s, 1H), 9.77 (s, 1H), 9.26 (d, *J* = 10.6 Hz, 1H), 8.50 – 8.16 (m, 5H), 7.75 – 6.94 (m, 5H), 6.86 (d, *J* = 8.2 Hz, 1H).

**<sup>13</sup>C NMR** (101 MHz, CDCl<sub>3</sub>) δ 161.99, 158.51, 150.01, 149.93, 147.54, 146.39, 137.89, 137.69, 119.19, 118.82, 114.11, 109.50.

**HRMS** *m/z* (ESI): calcd. for [C<sub>19</sub>H<sub>14</sub>N<sub>2</sub>+H]<sup>+</sup>: 271.1236 Found: 271.1243

## 6. <sup>1</sup>H and <sup>13</sup>C spectra of products

**3aa**

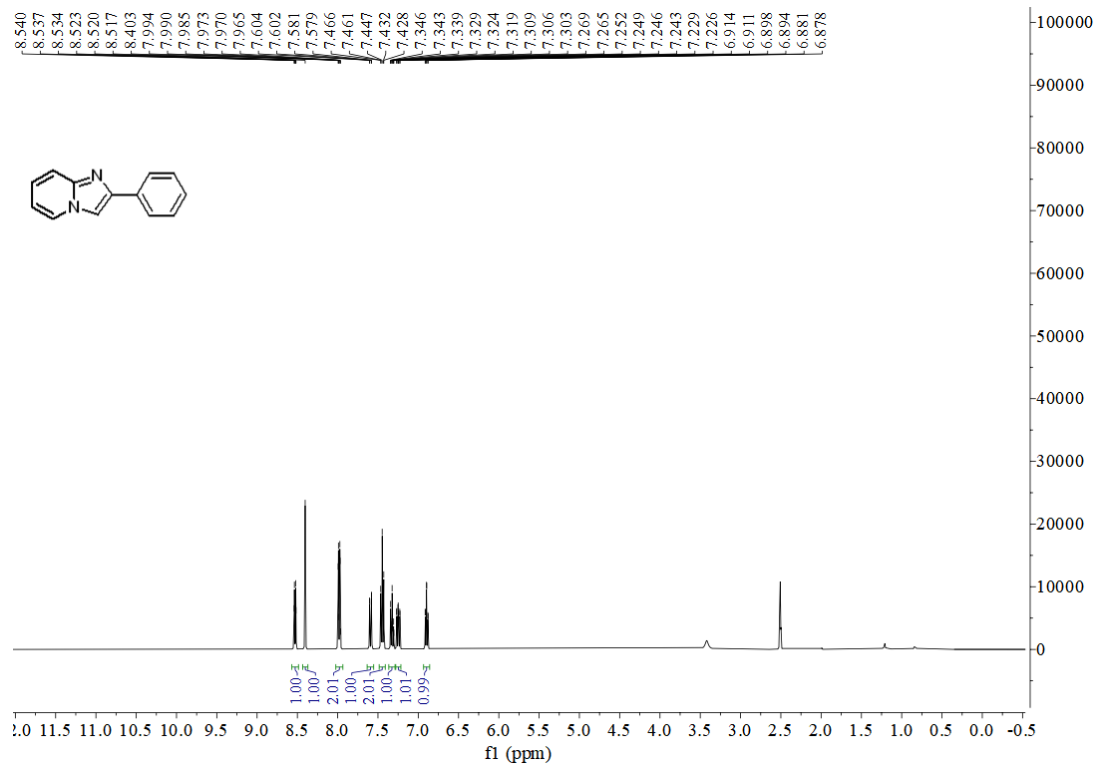

**3aa**

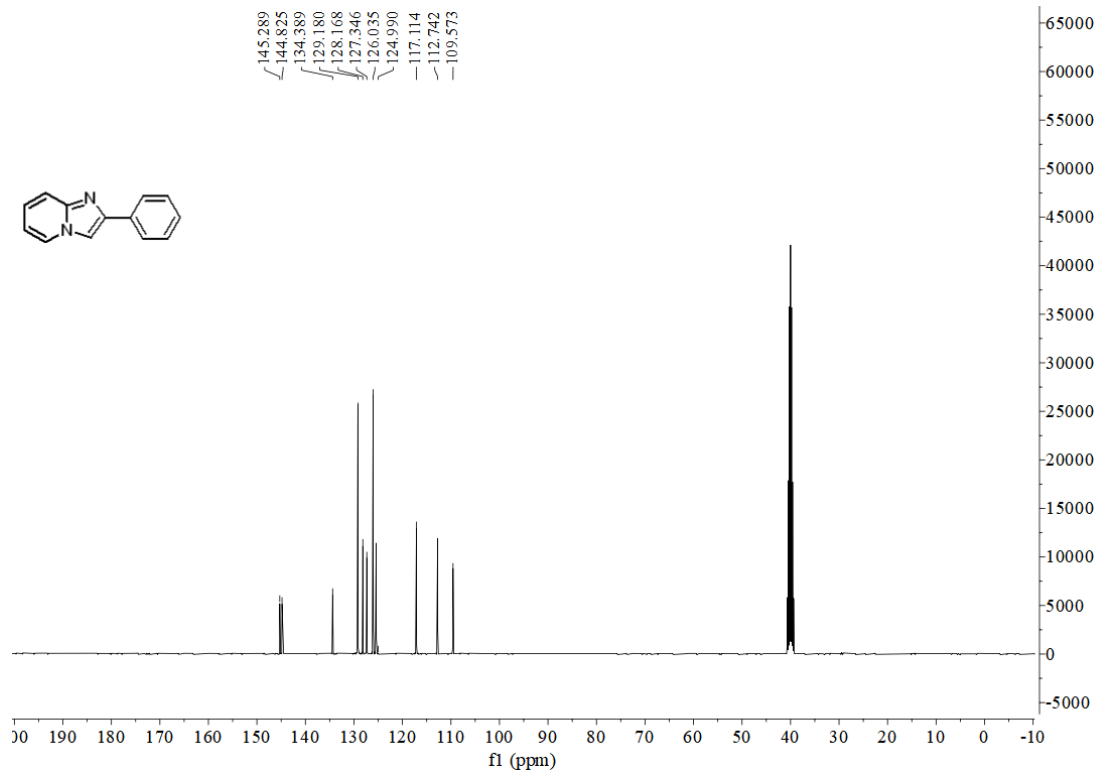

3ba

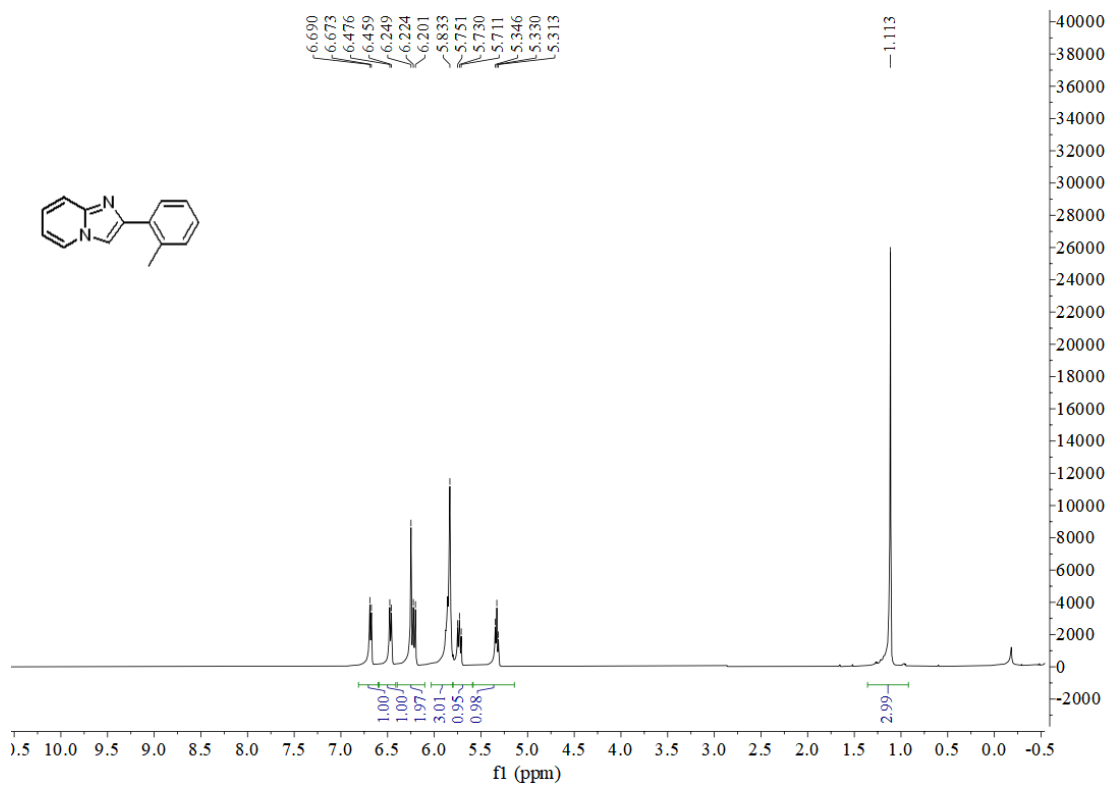

3ba

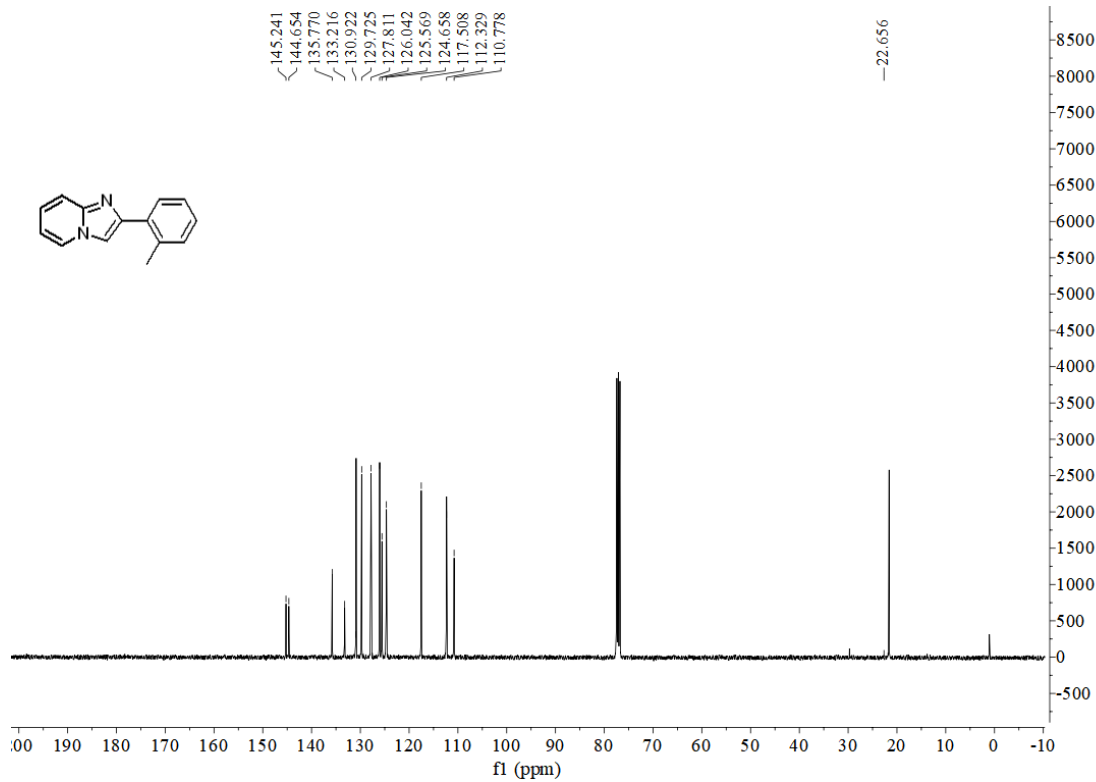

3ca

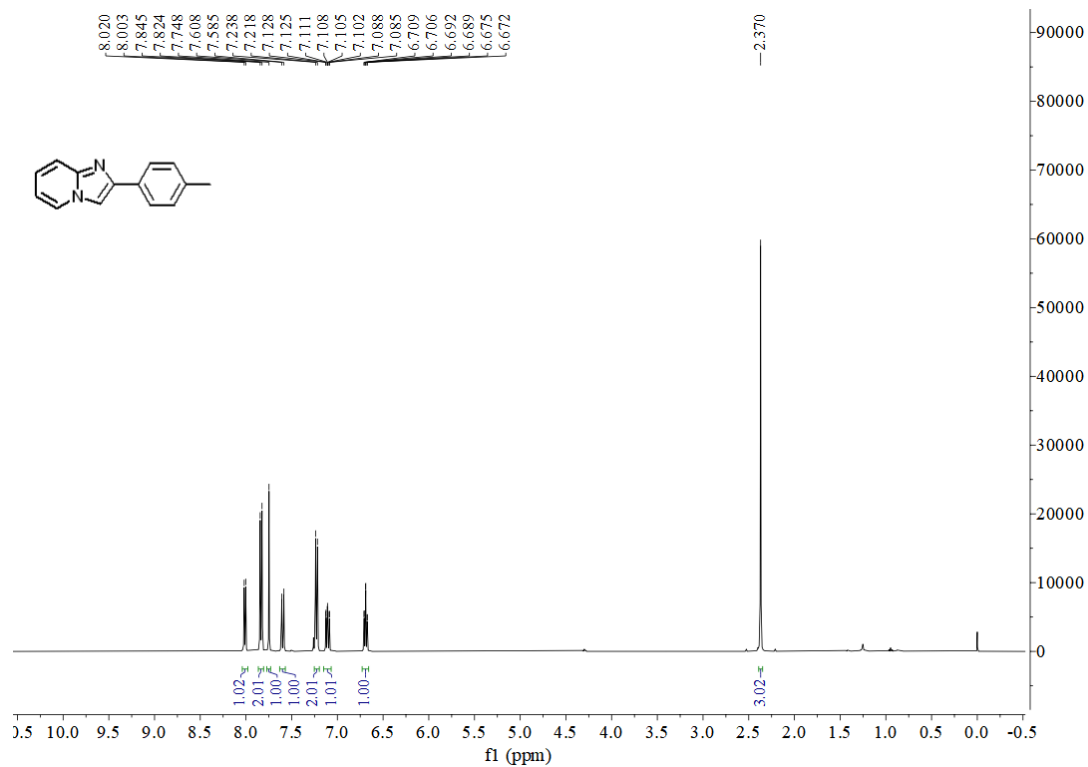

3ca

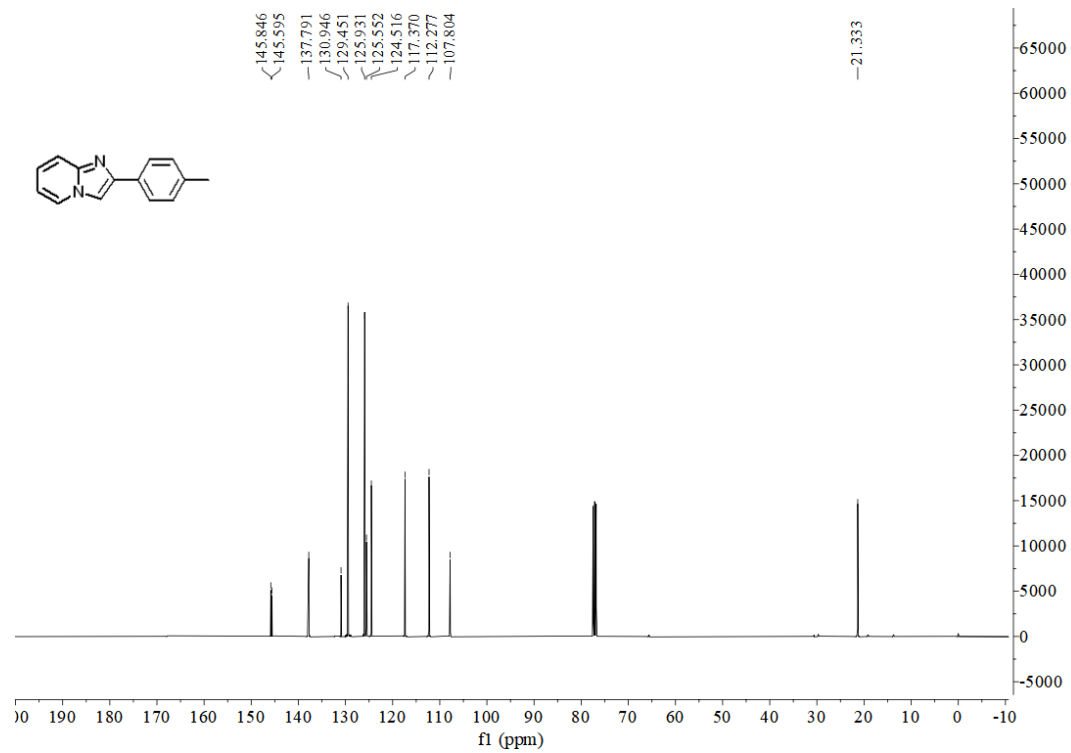

3da

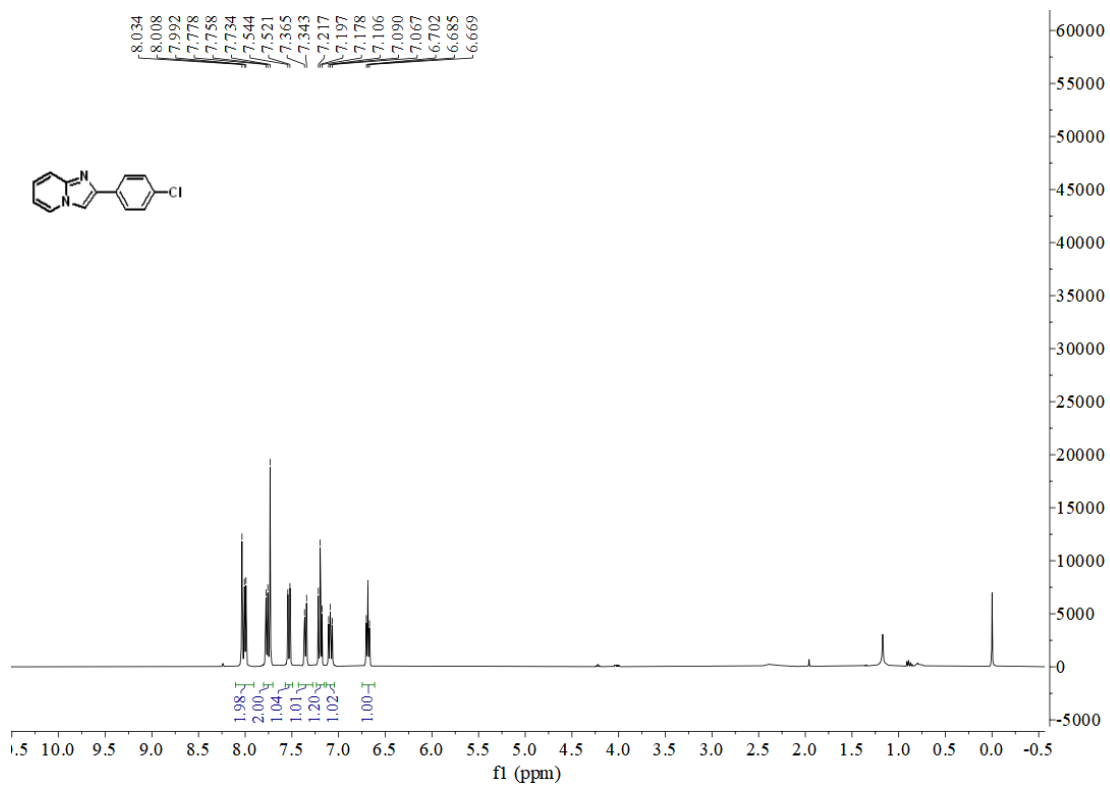

3da

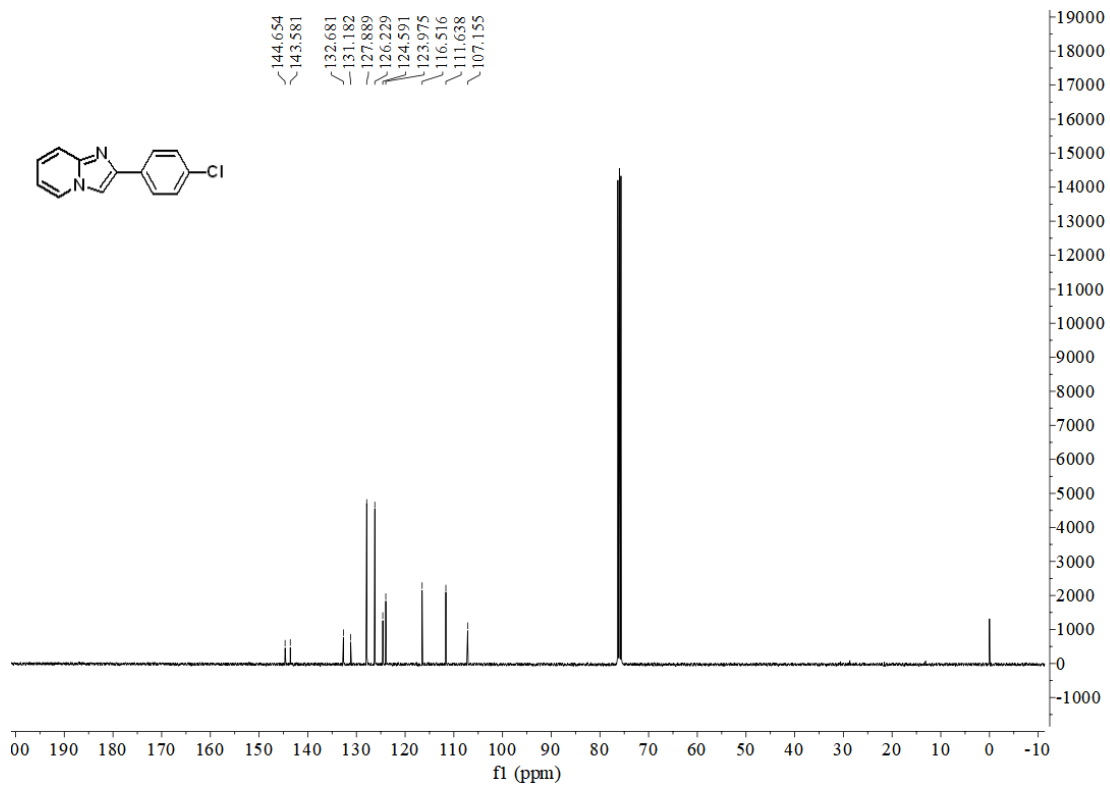

3ea

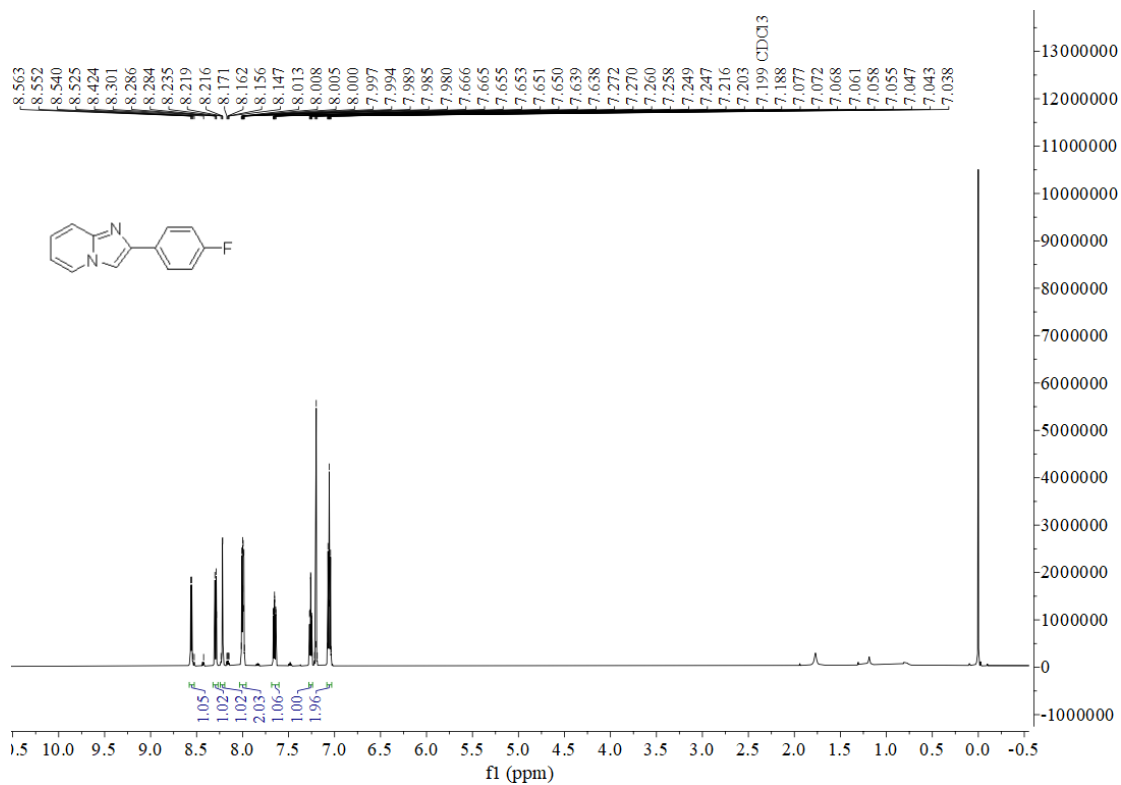

3ea

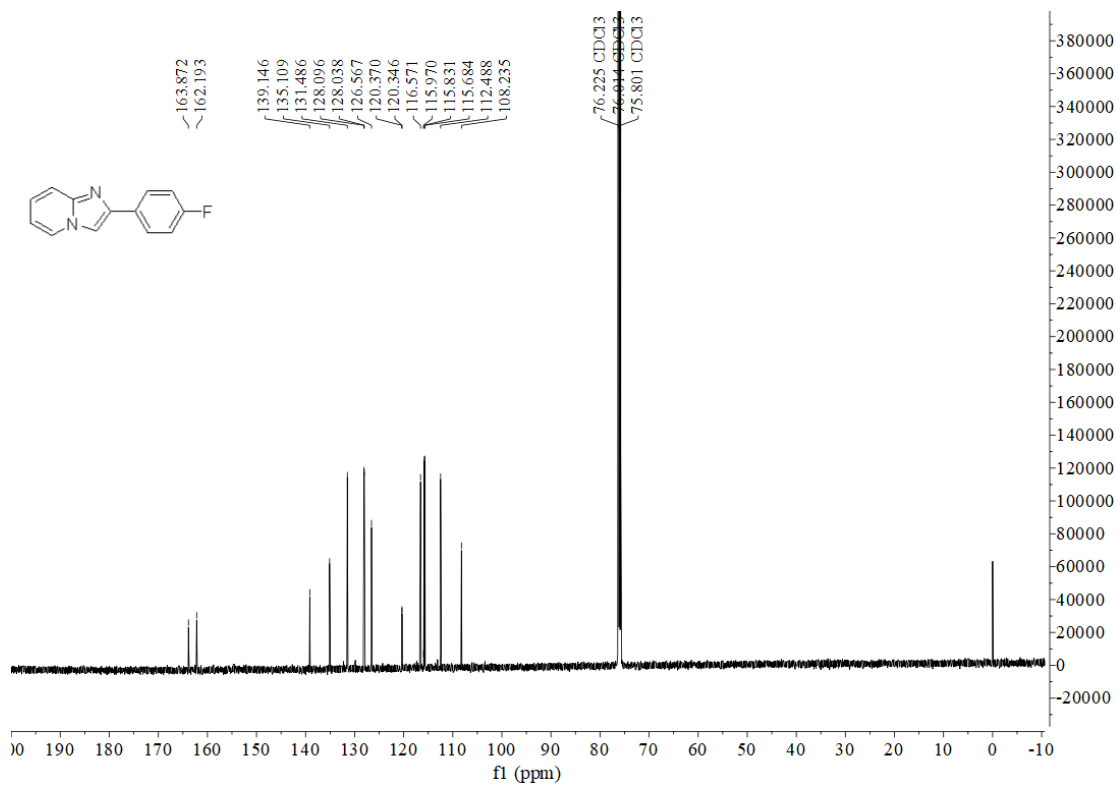

3fa

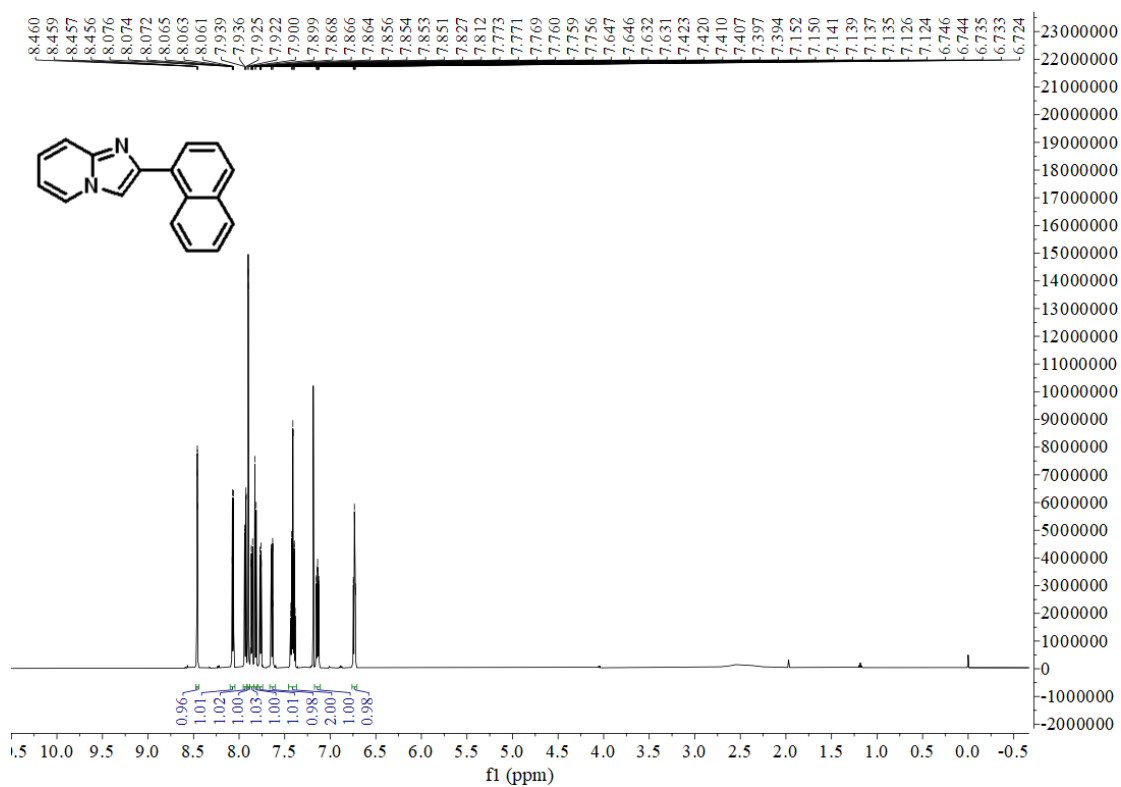

3fa

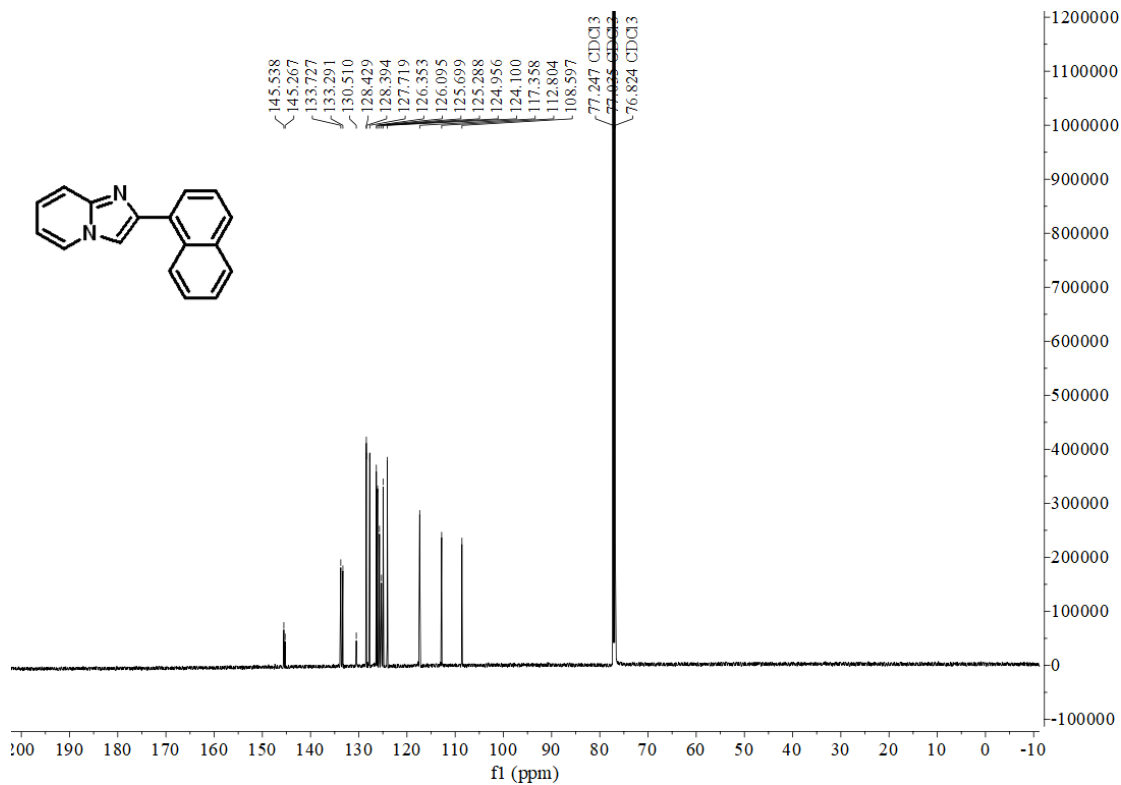

**3ga**

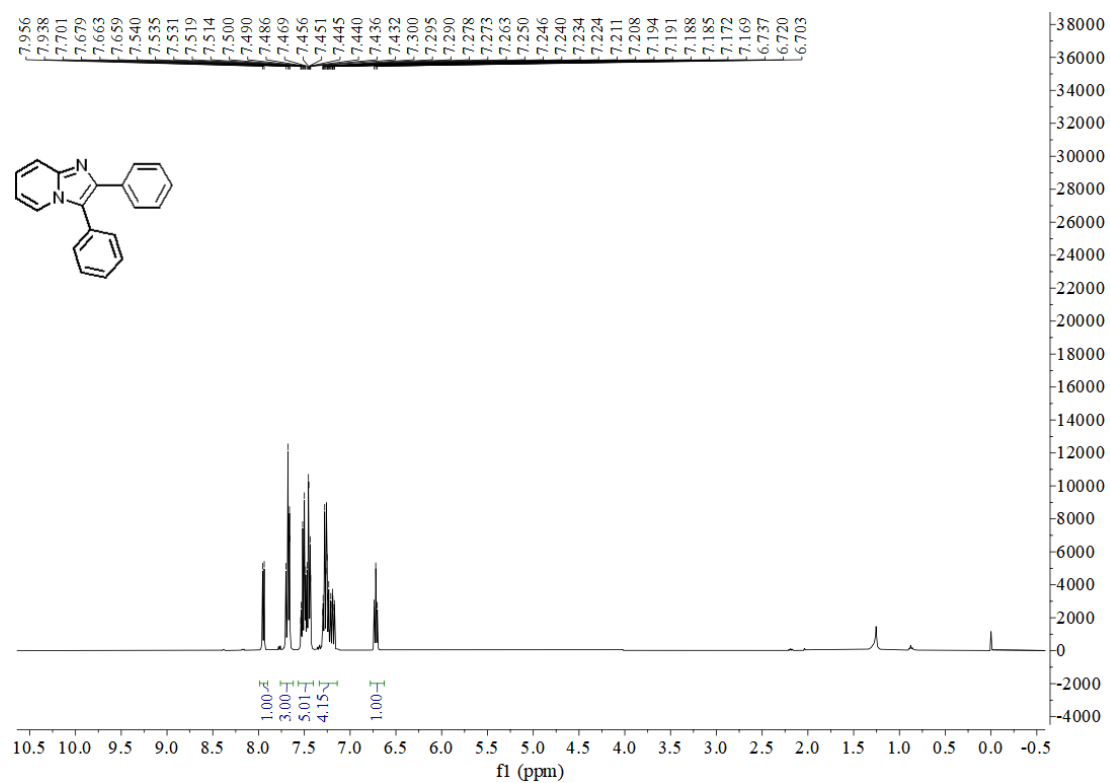

**3ga**

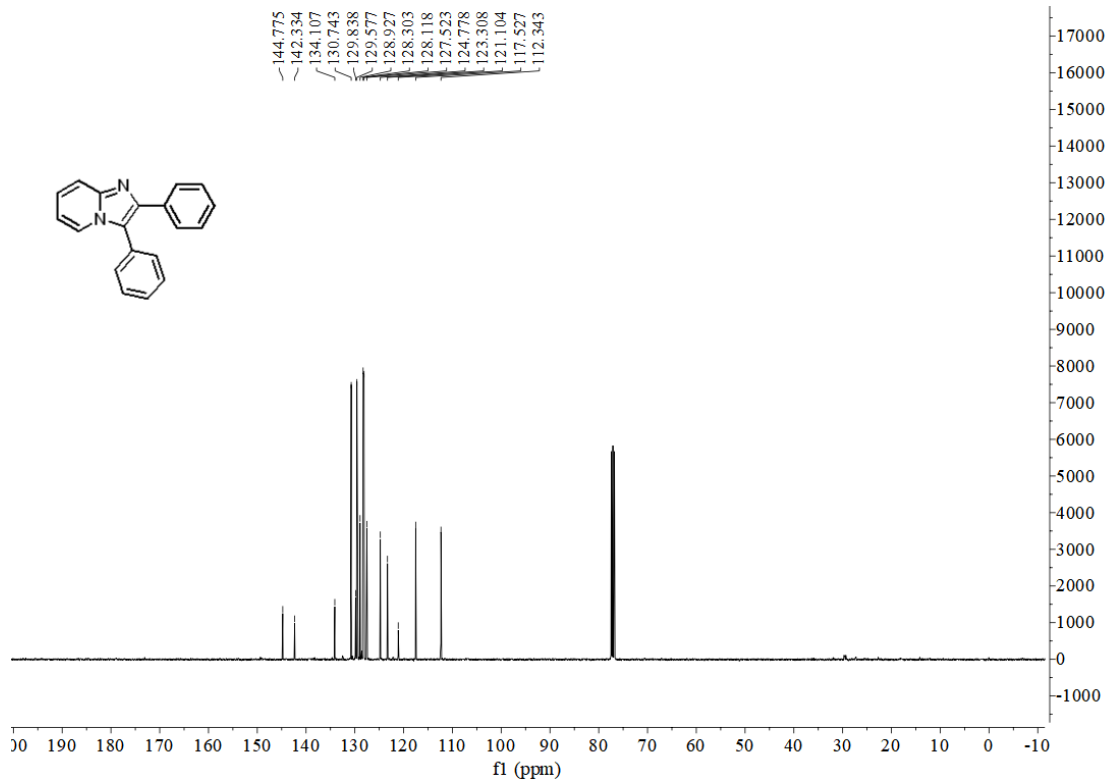



3ha

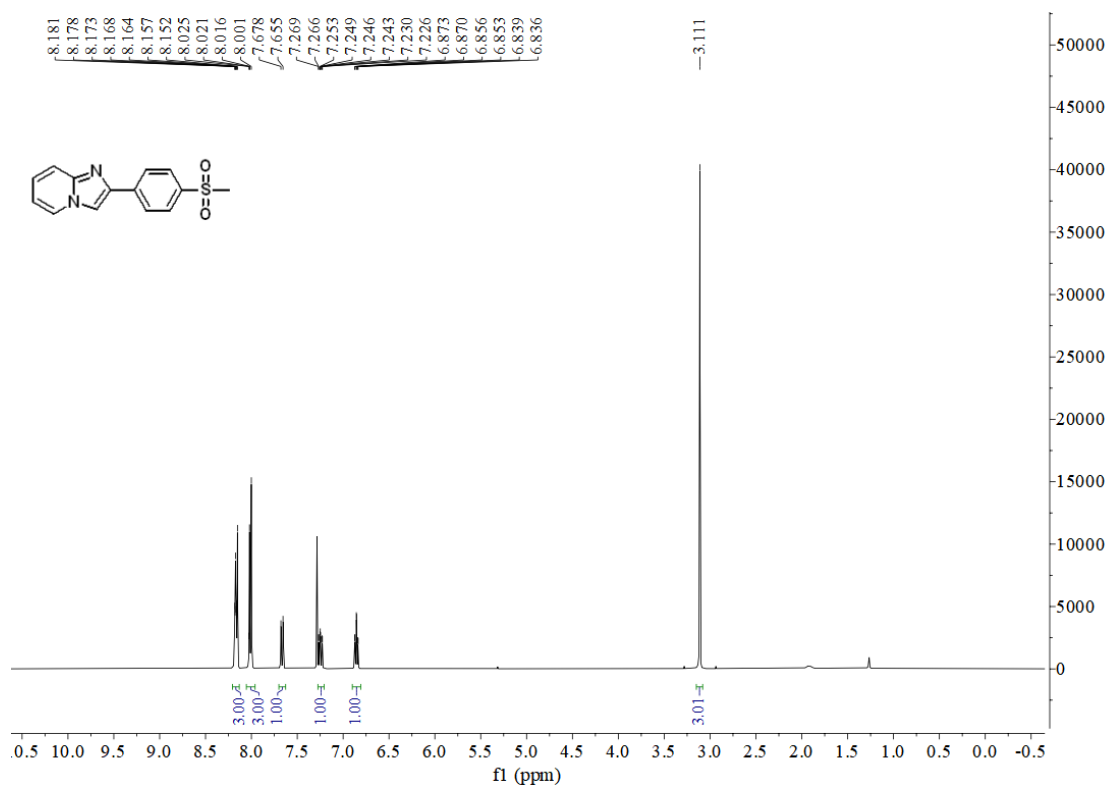

3ha

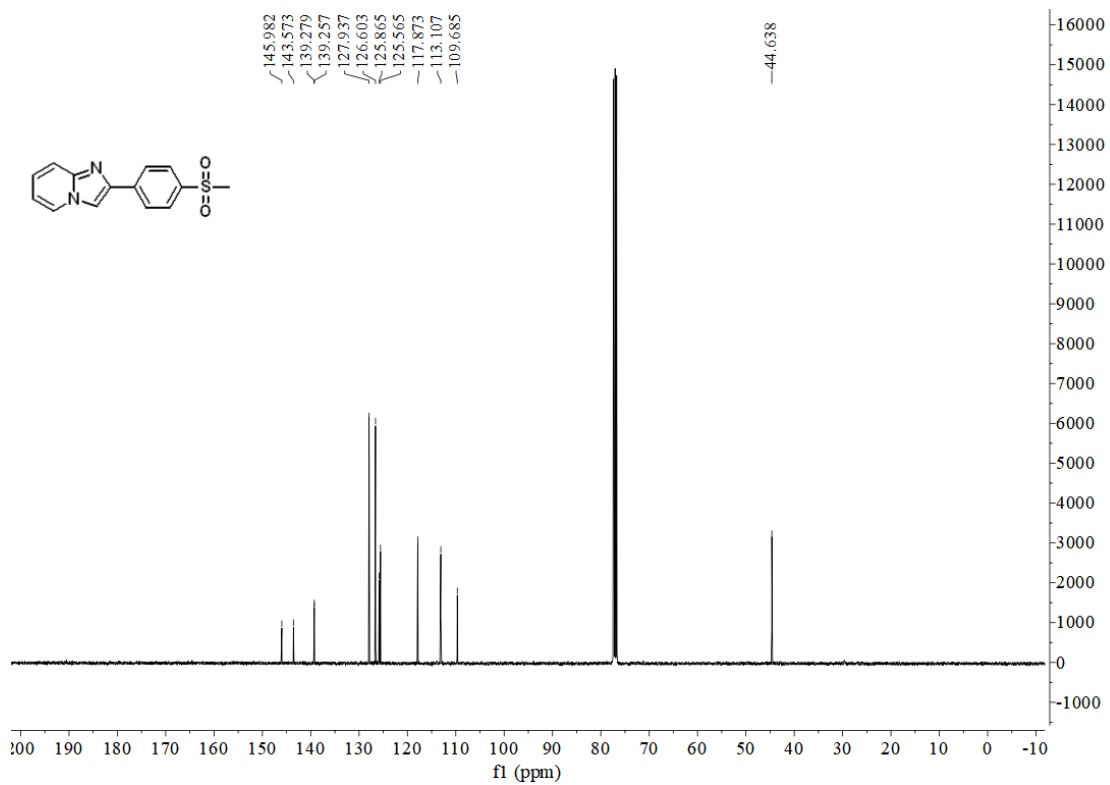

**3ia**

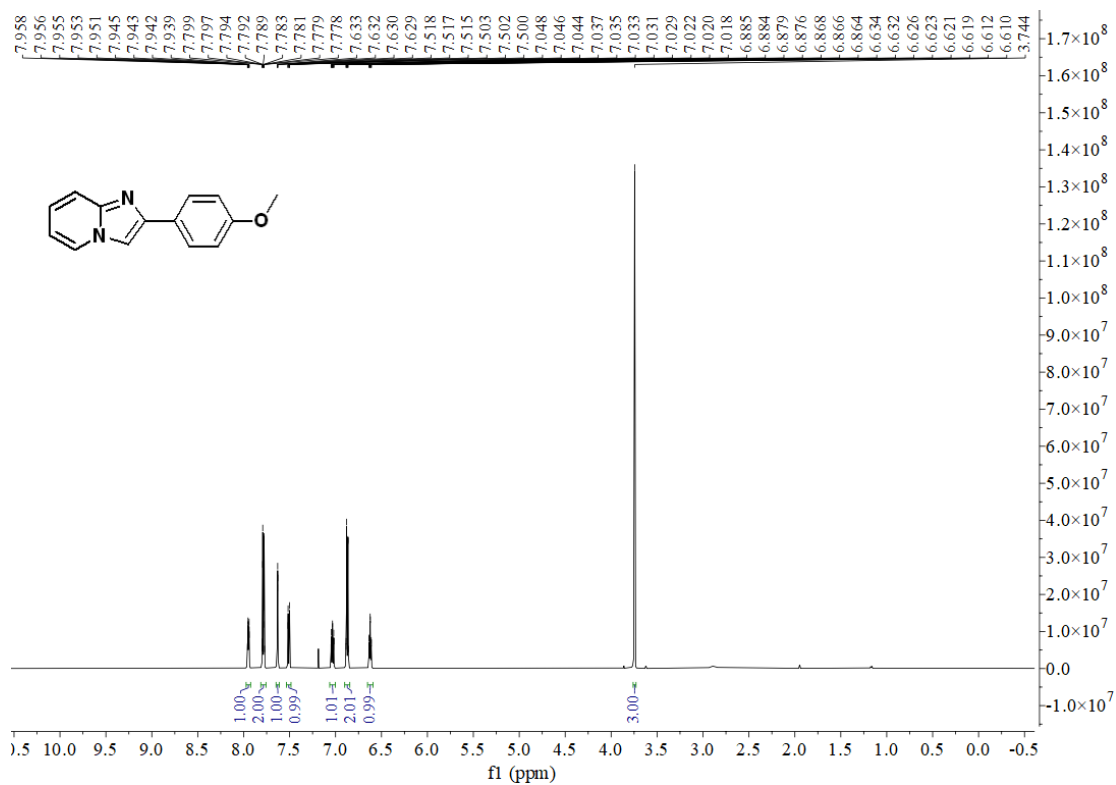

**3ia**

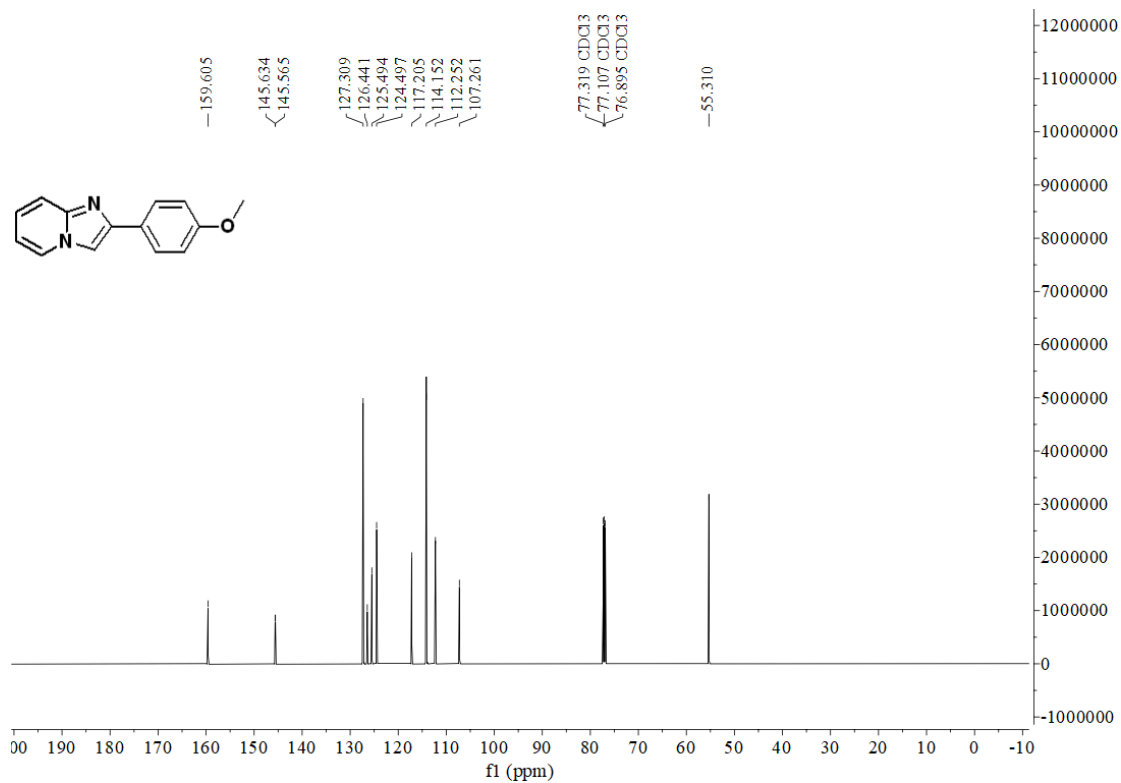

3ja

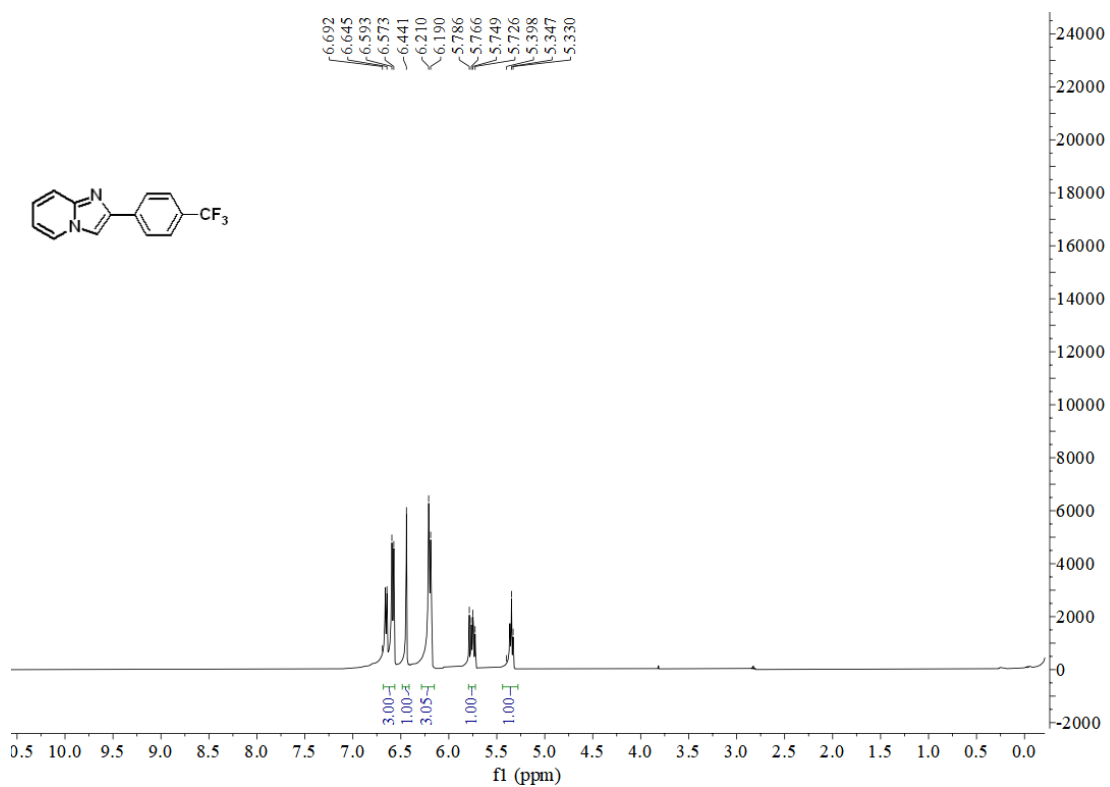

3ja

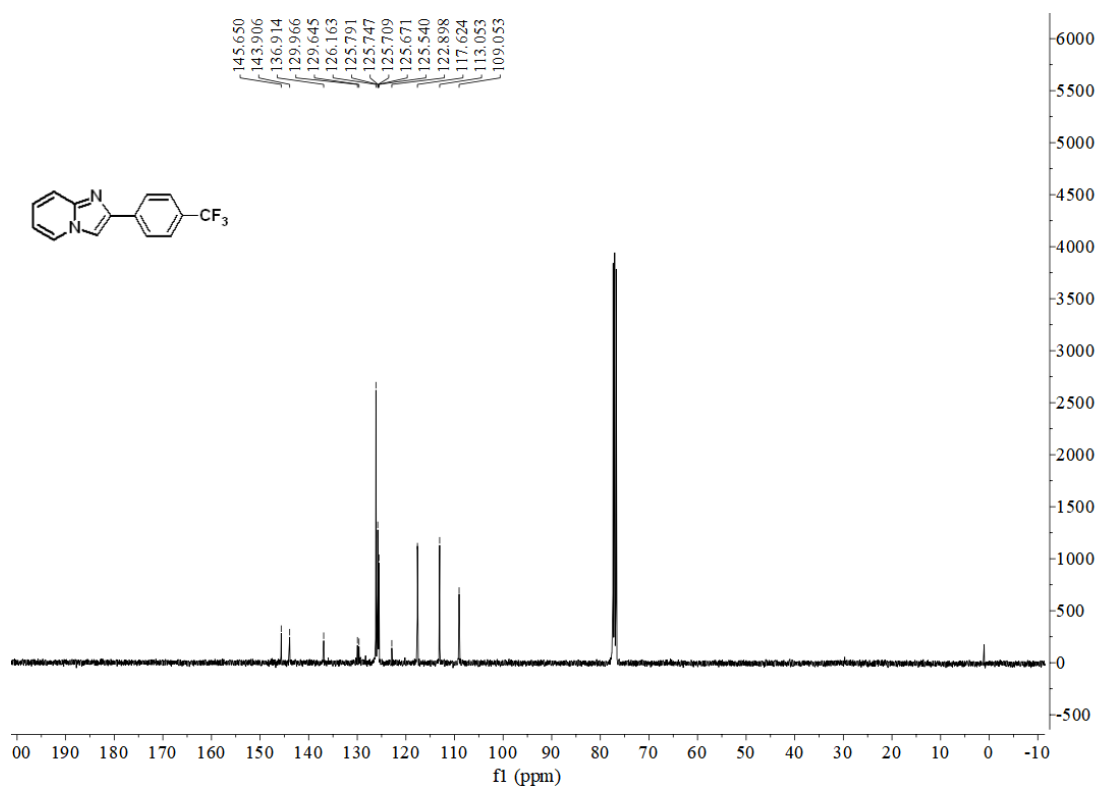

3ka

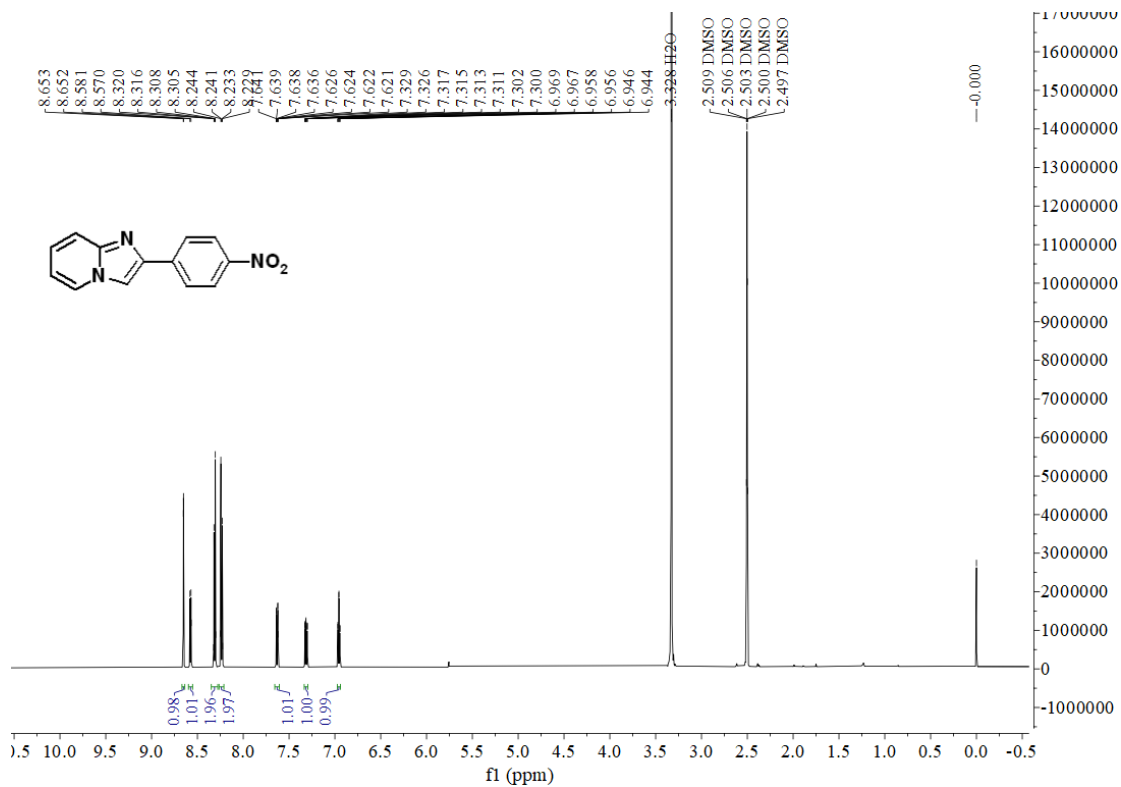

3ka

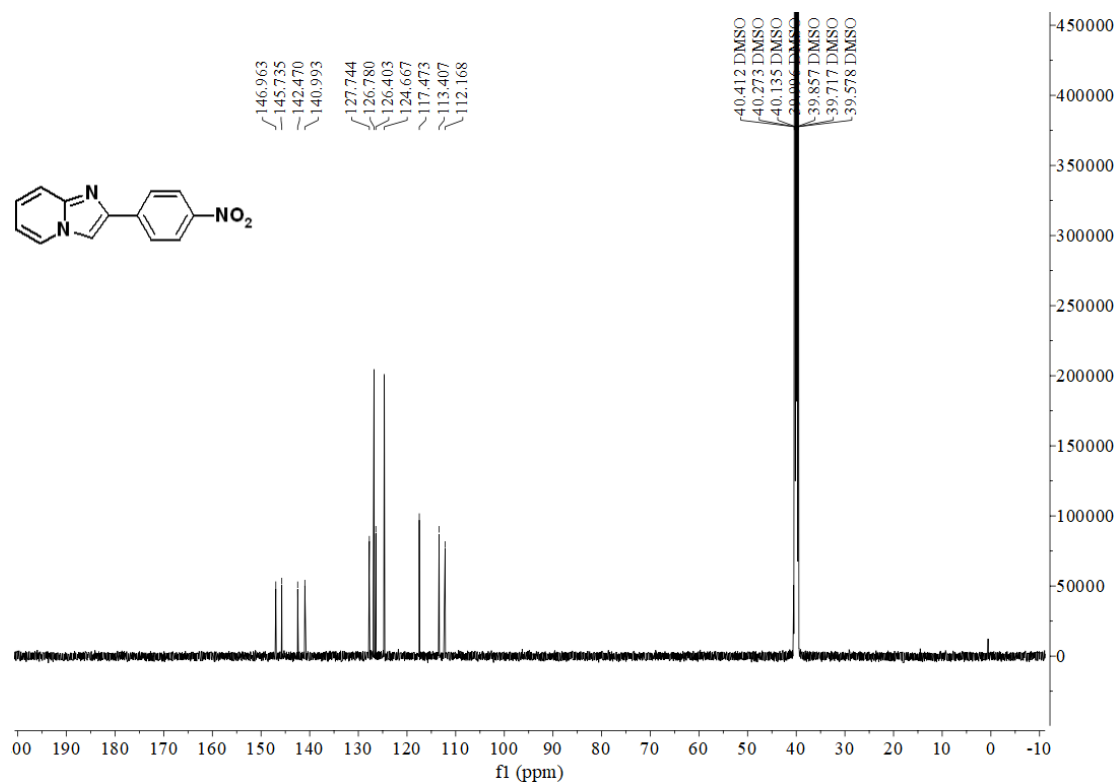

31a

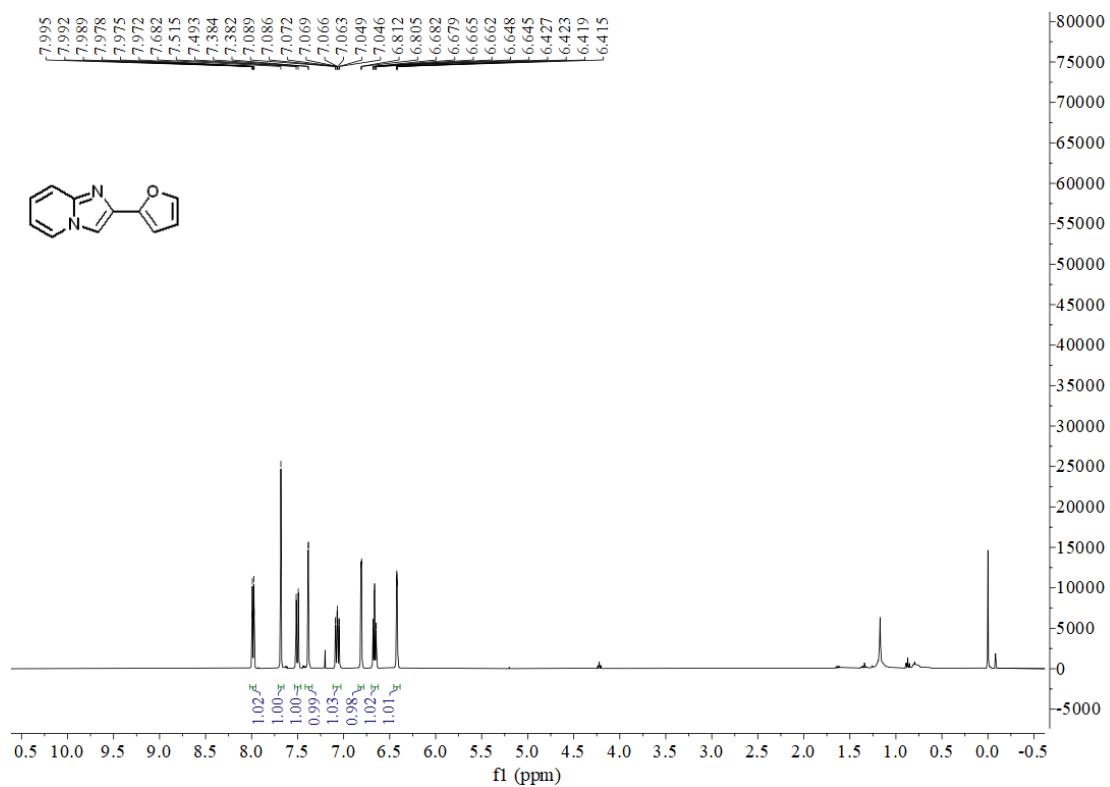

31a

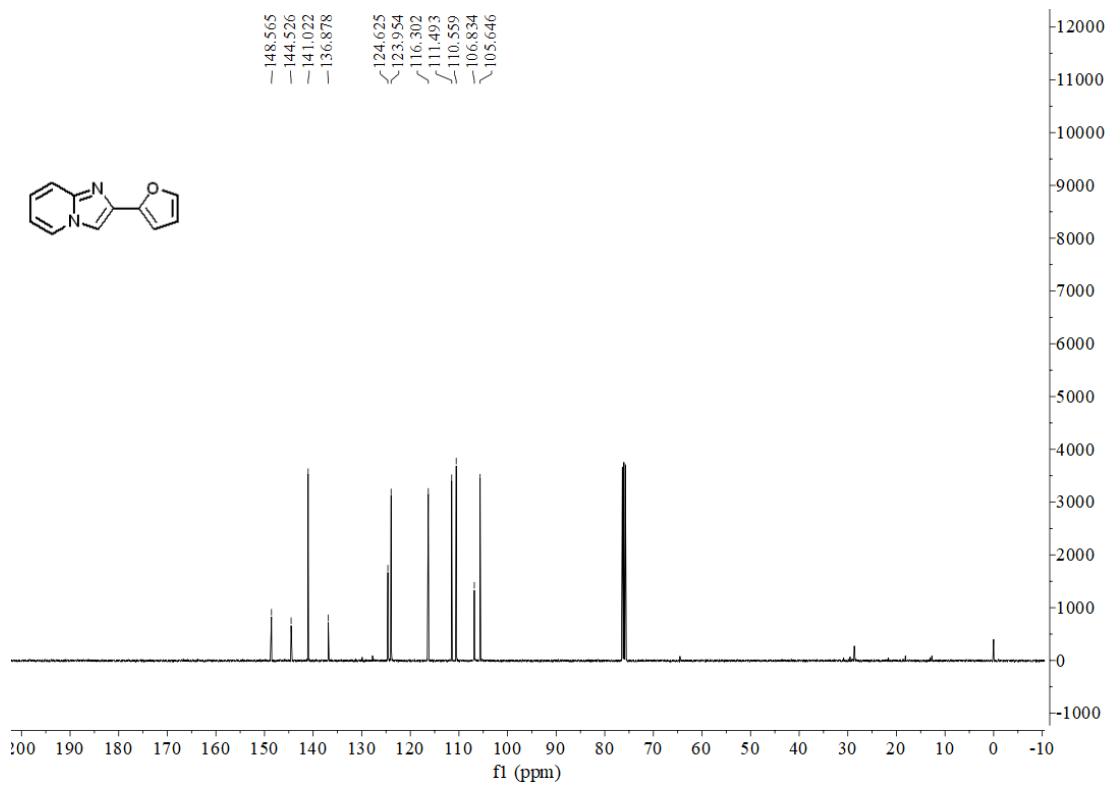

3ma

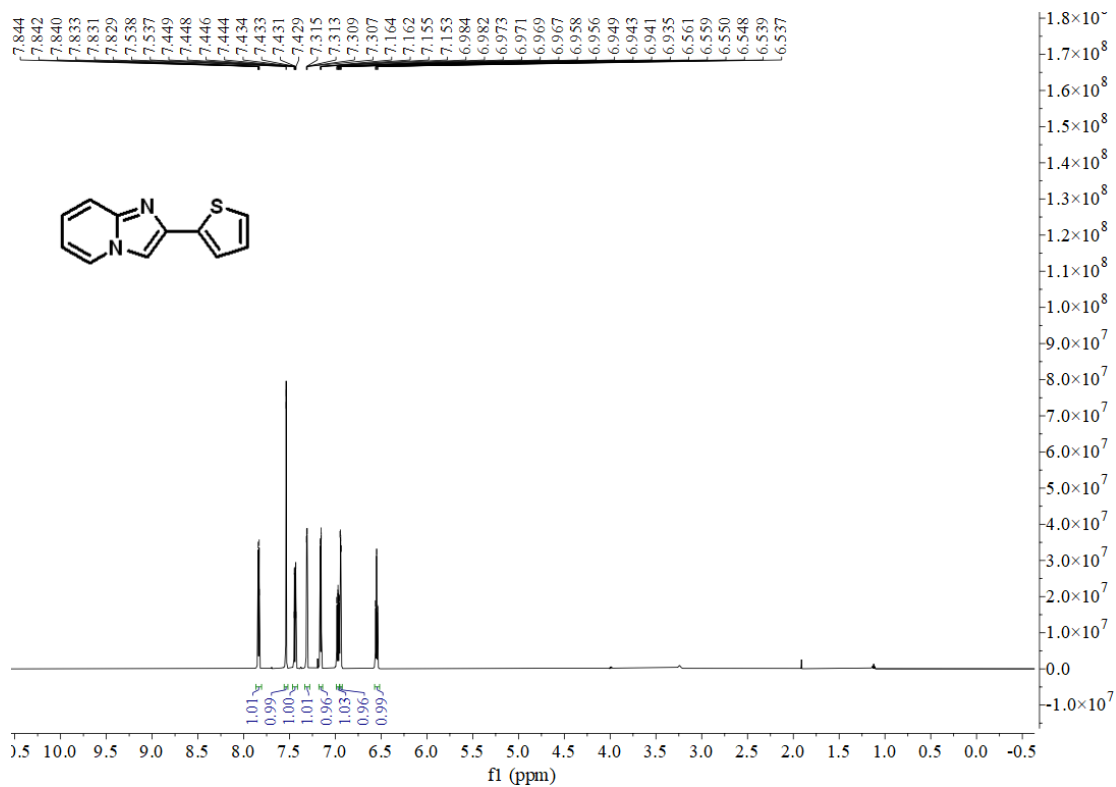

3ma

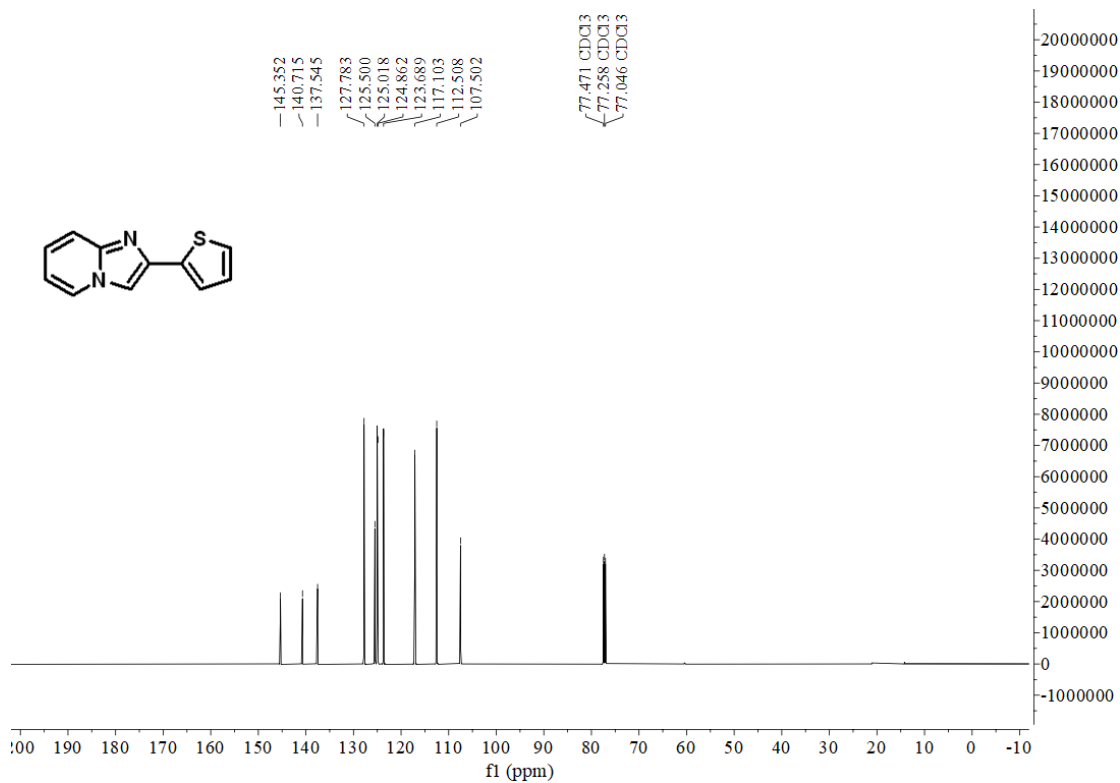

**3na**

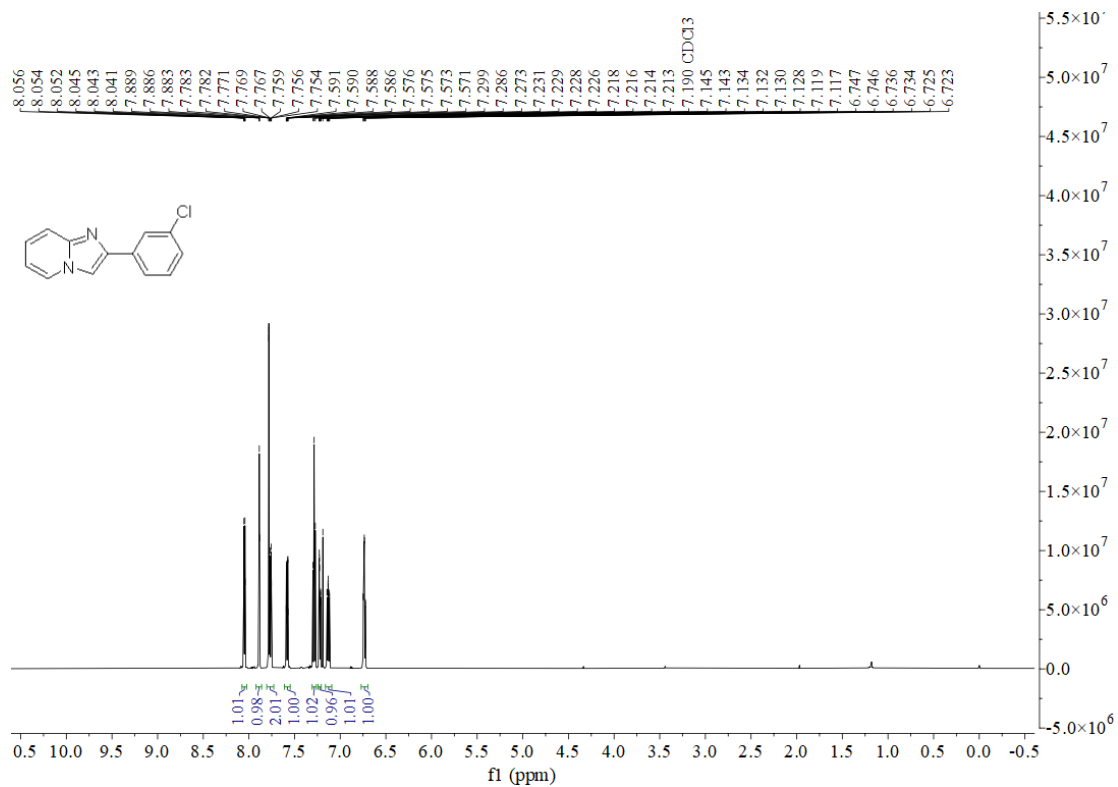

**3na**

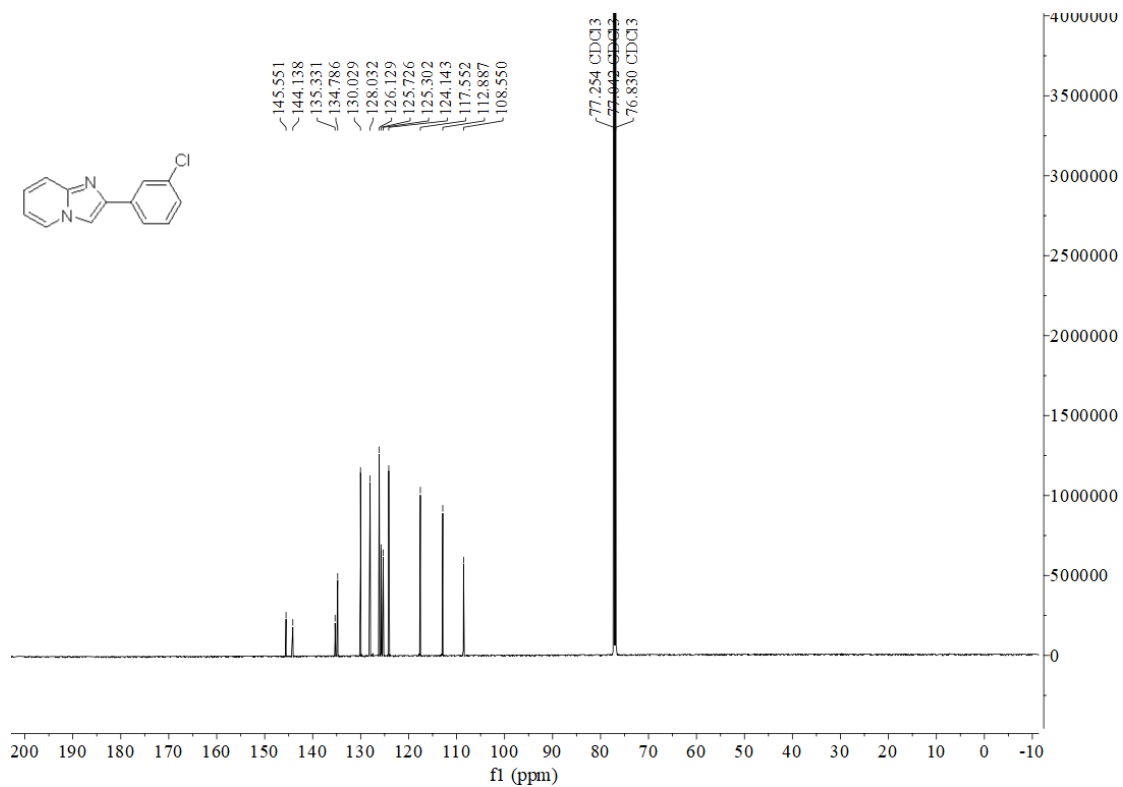

30a

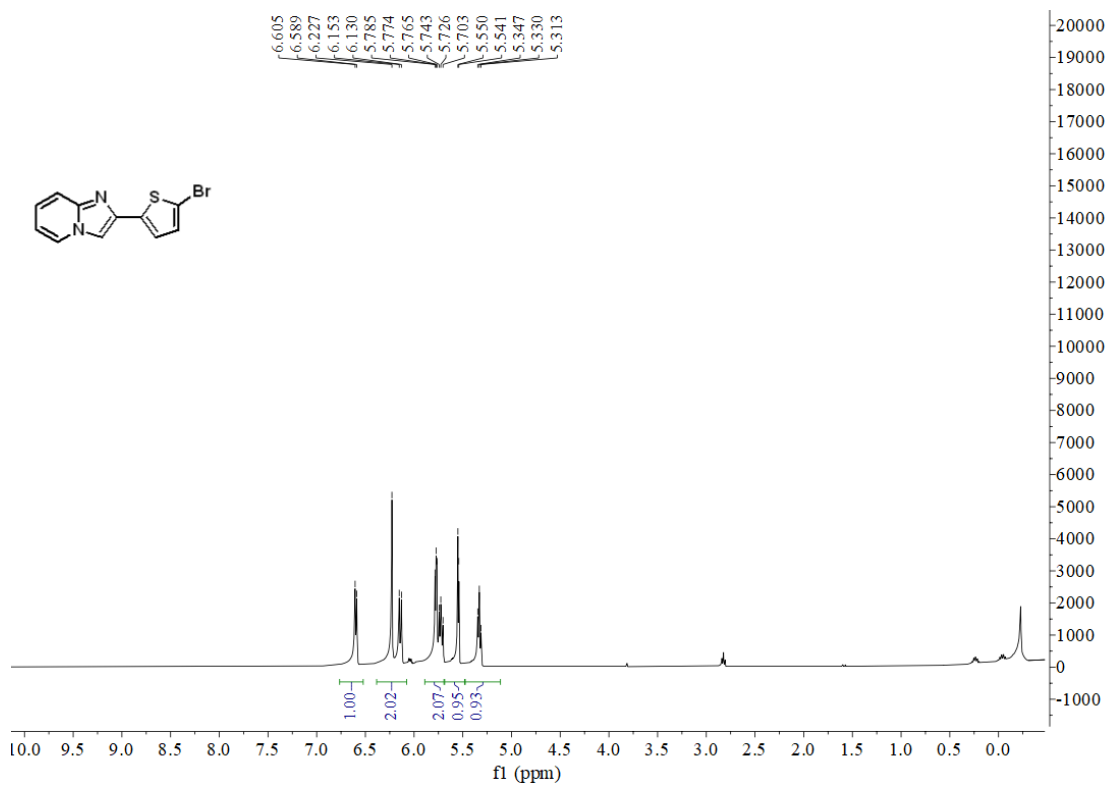

30a

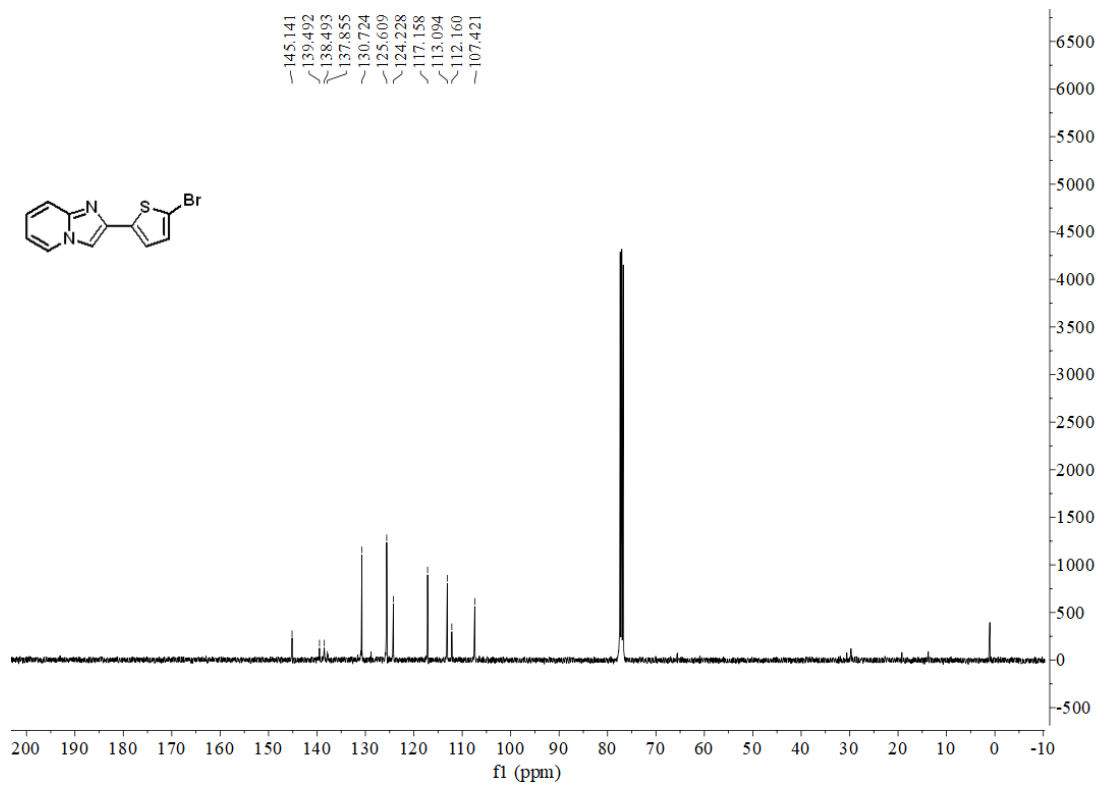



**3pa**

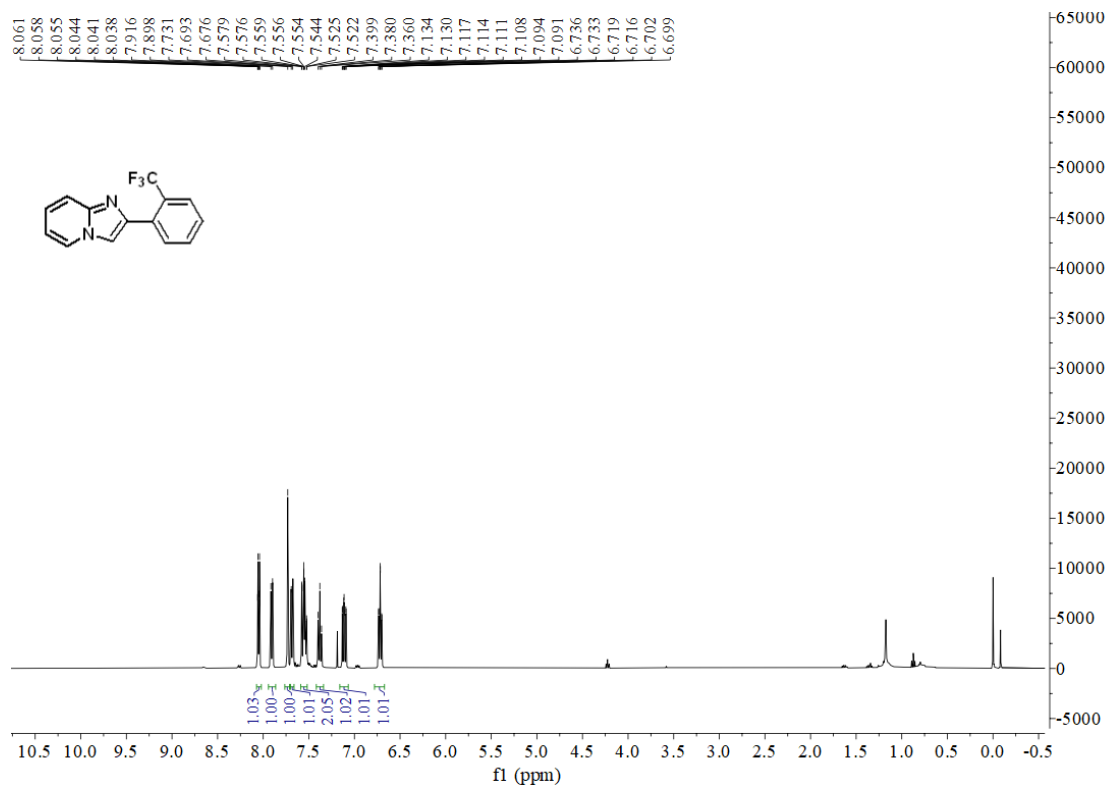

**3pa**

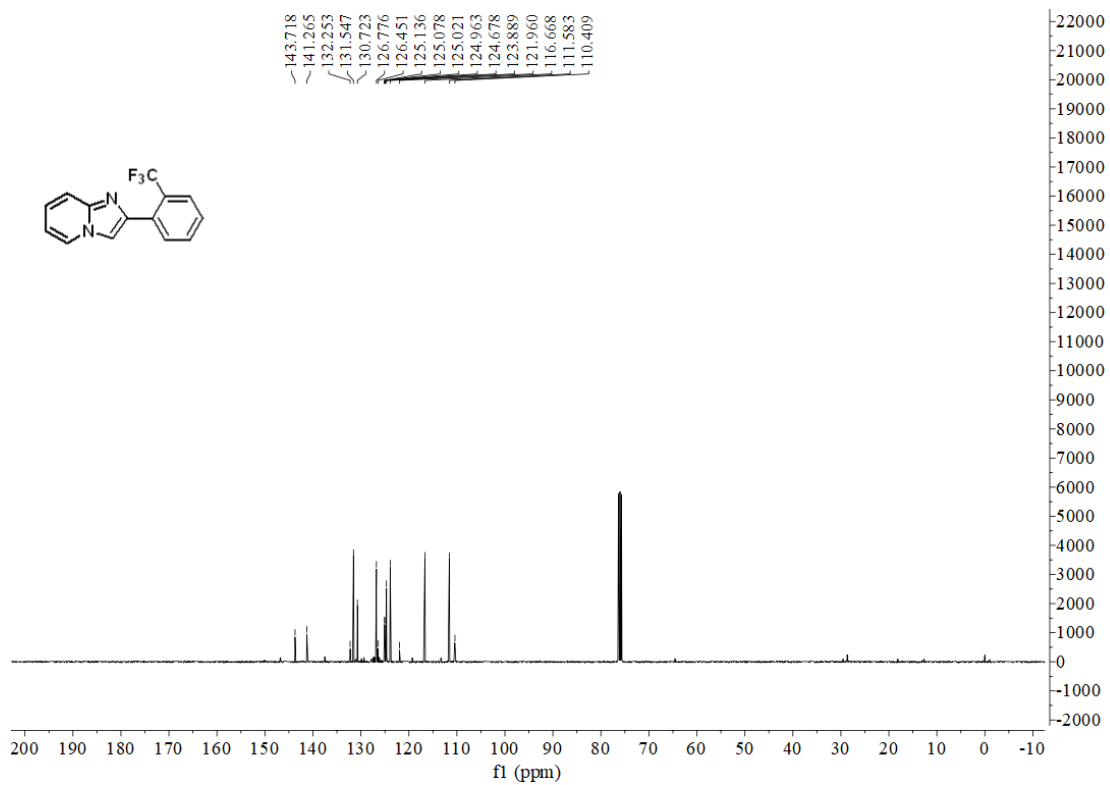

### 3qa

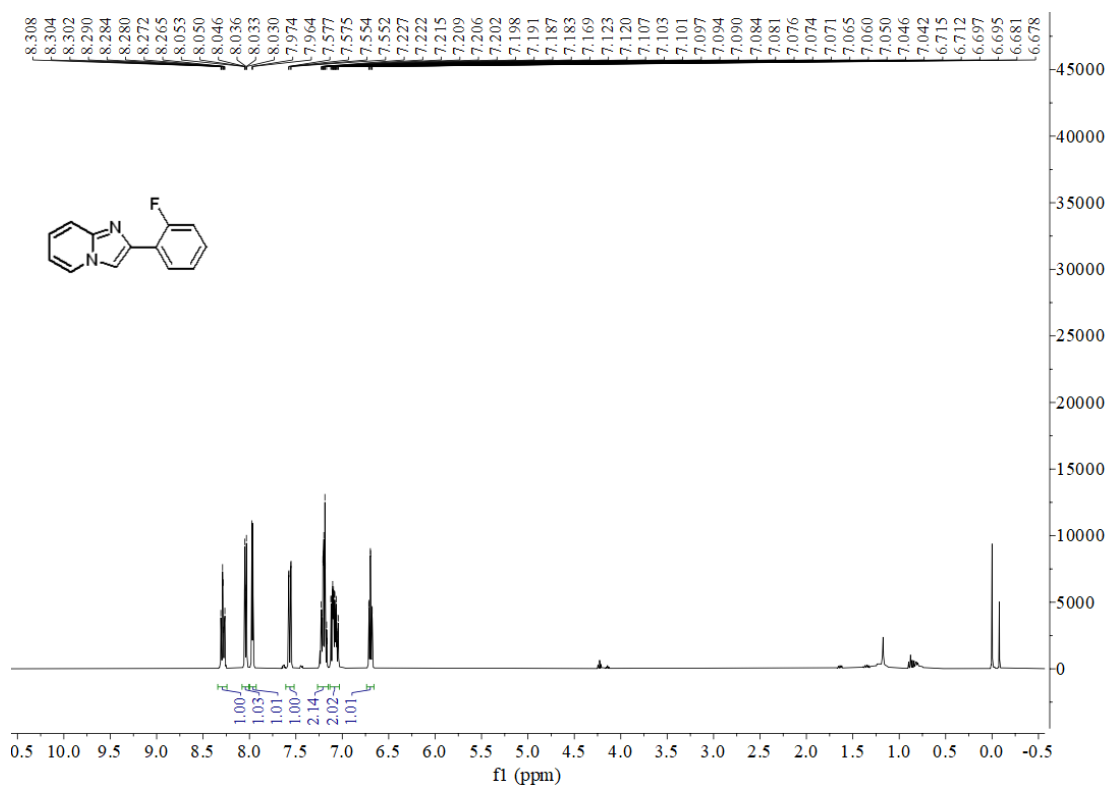

### 3qa

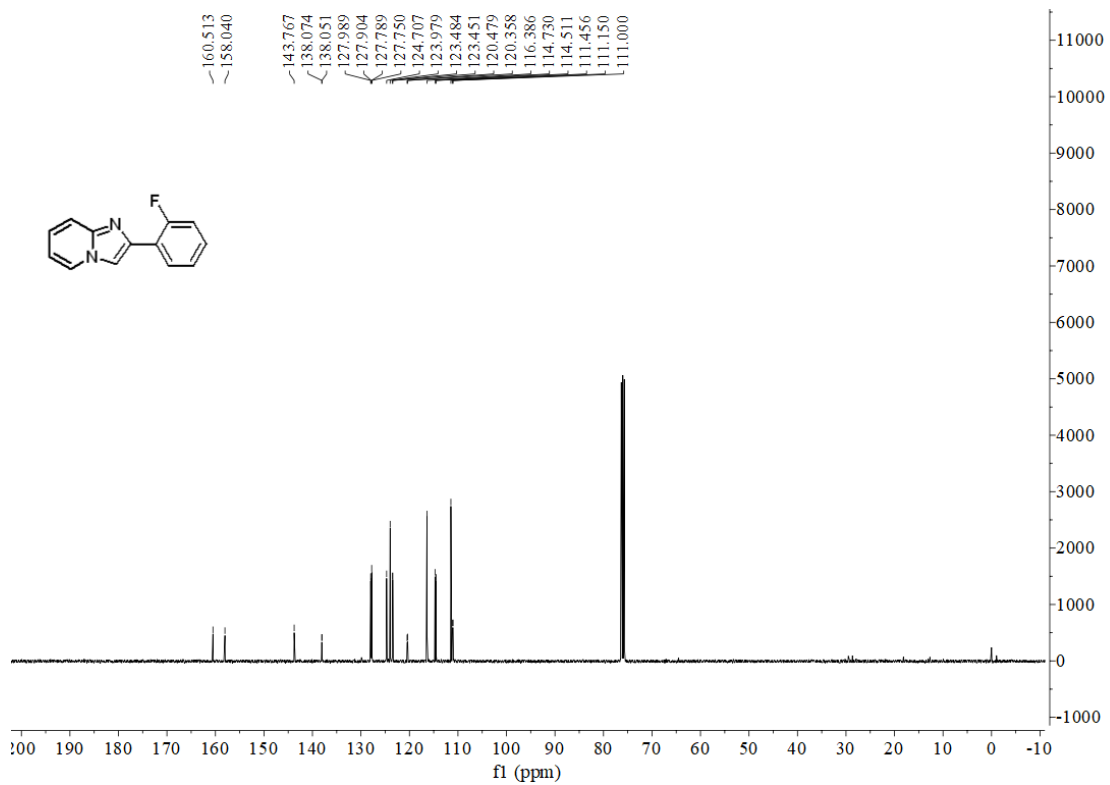

**3ra**

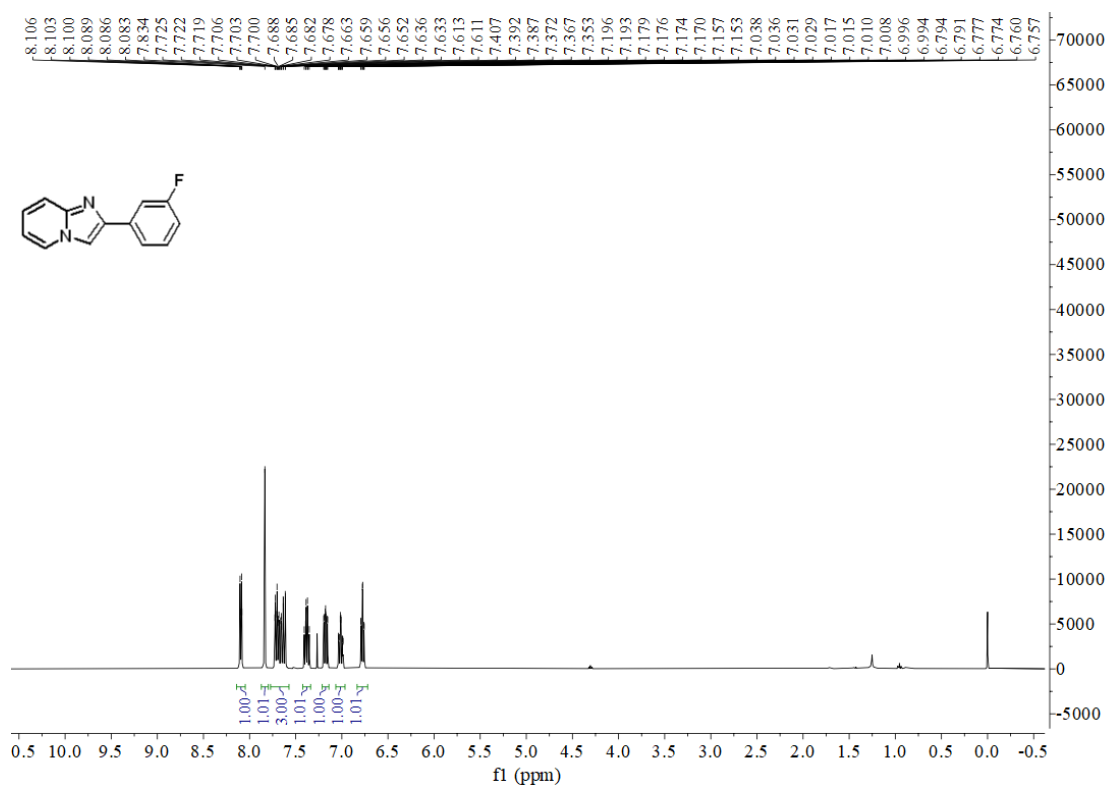

**3ra**

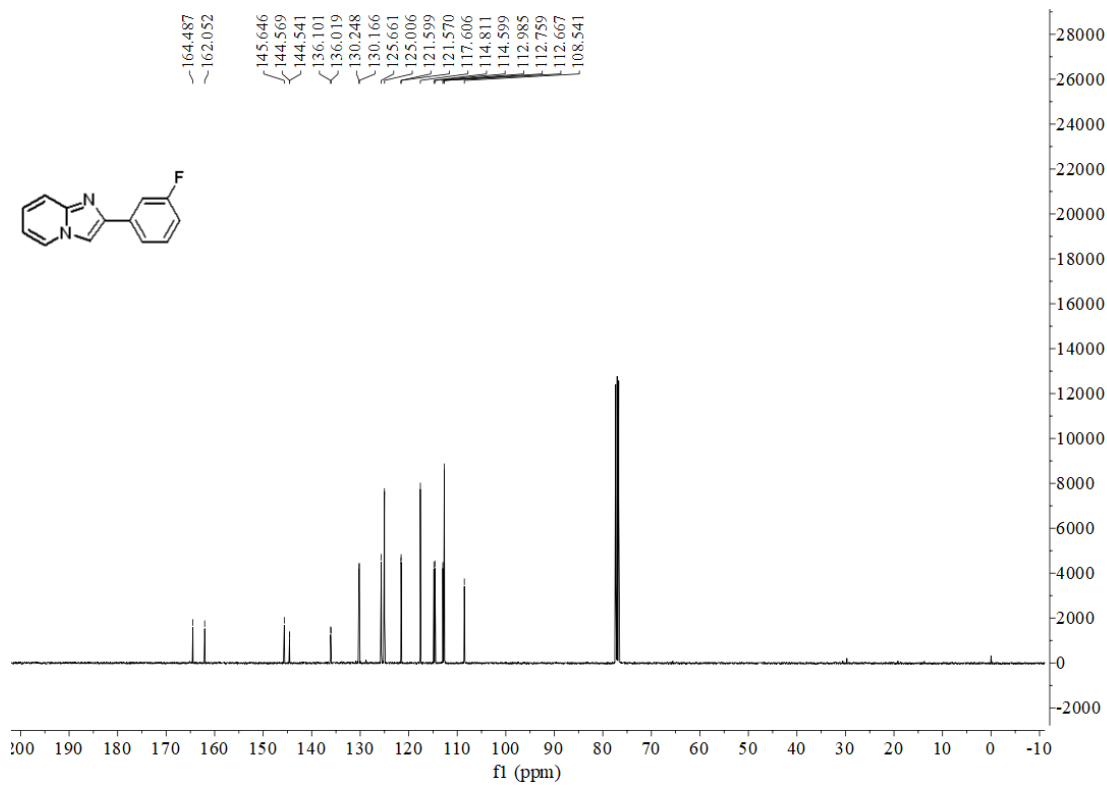

**3ab**

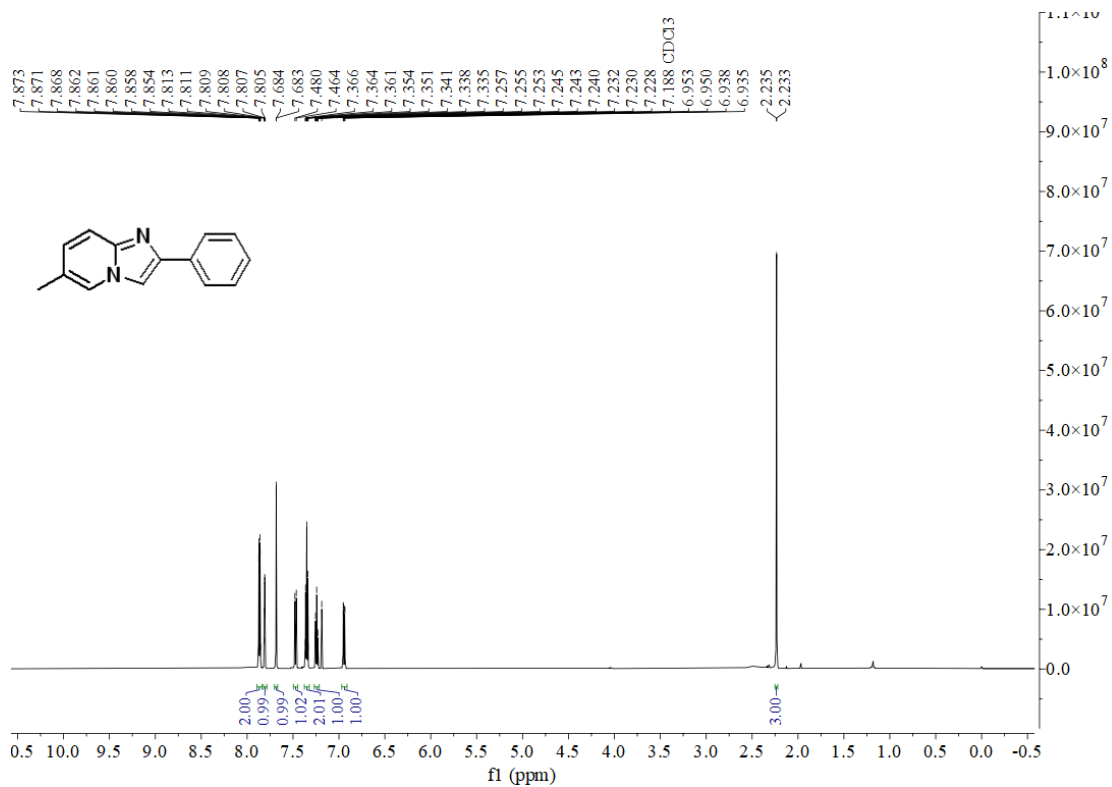

**3ab**

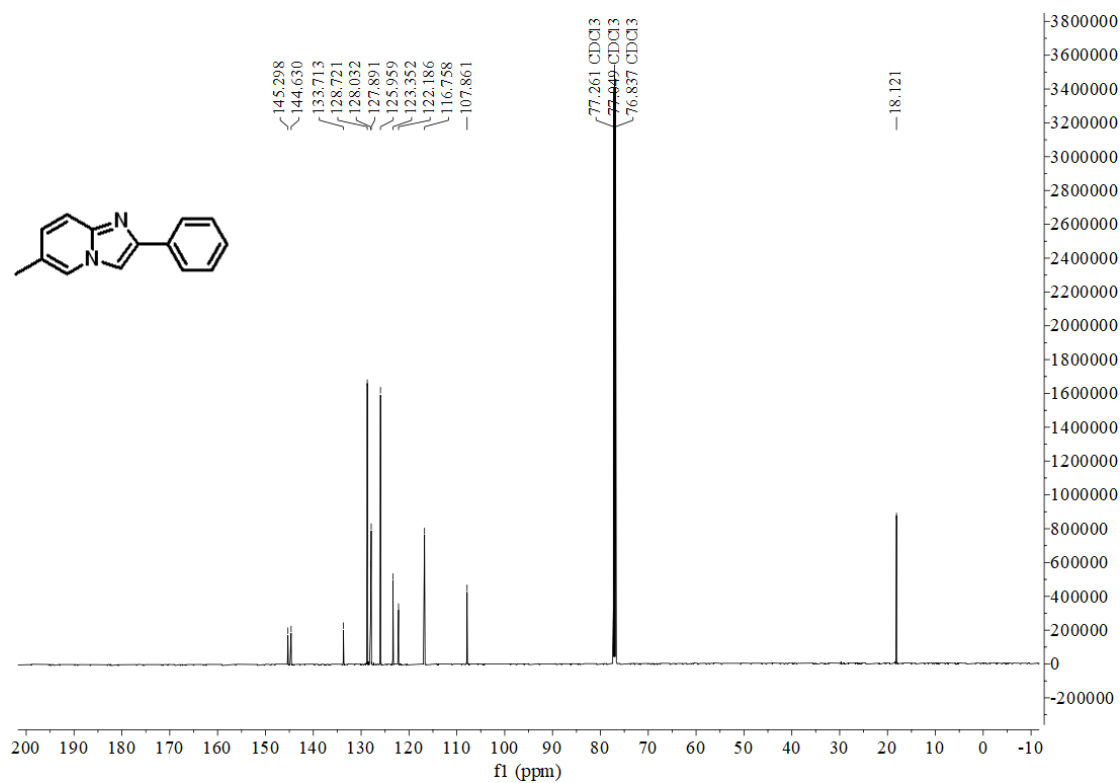

**3ac**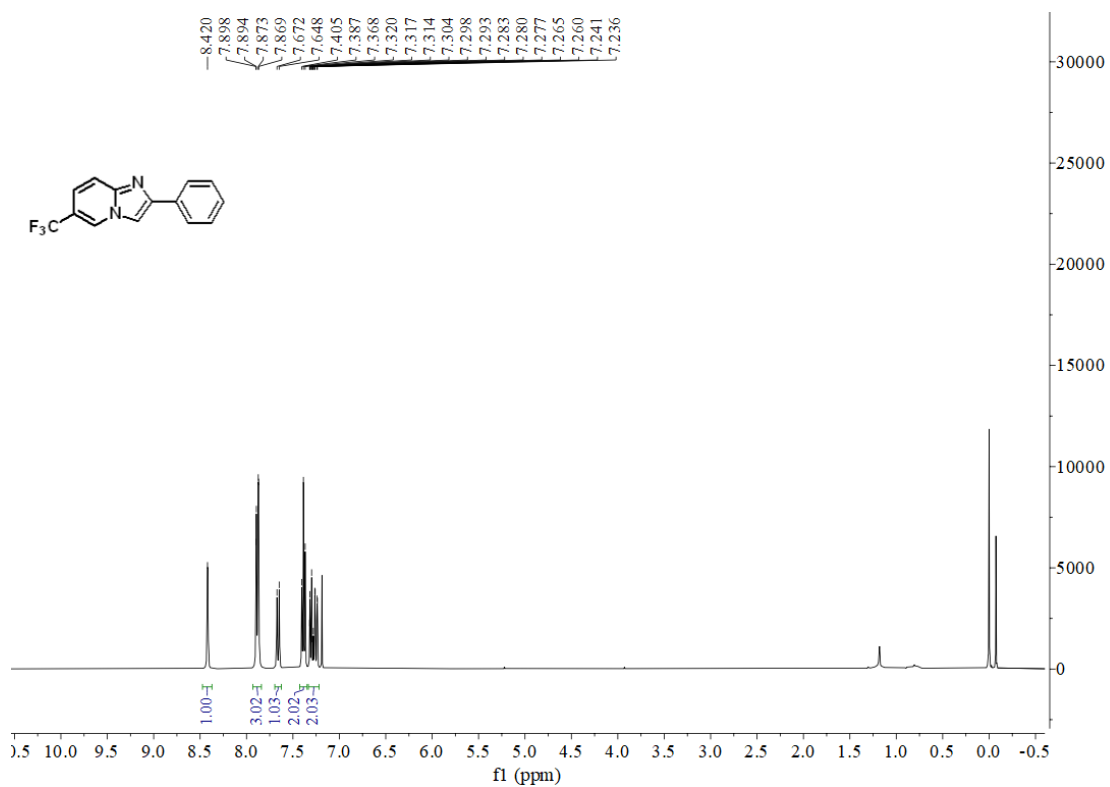**3ac**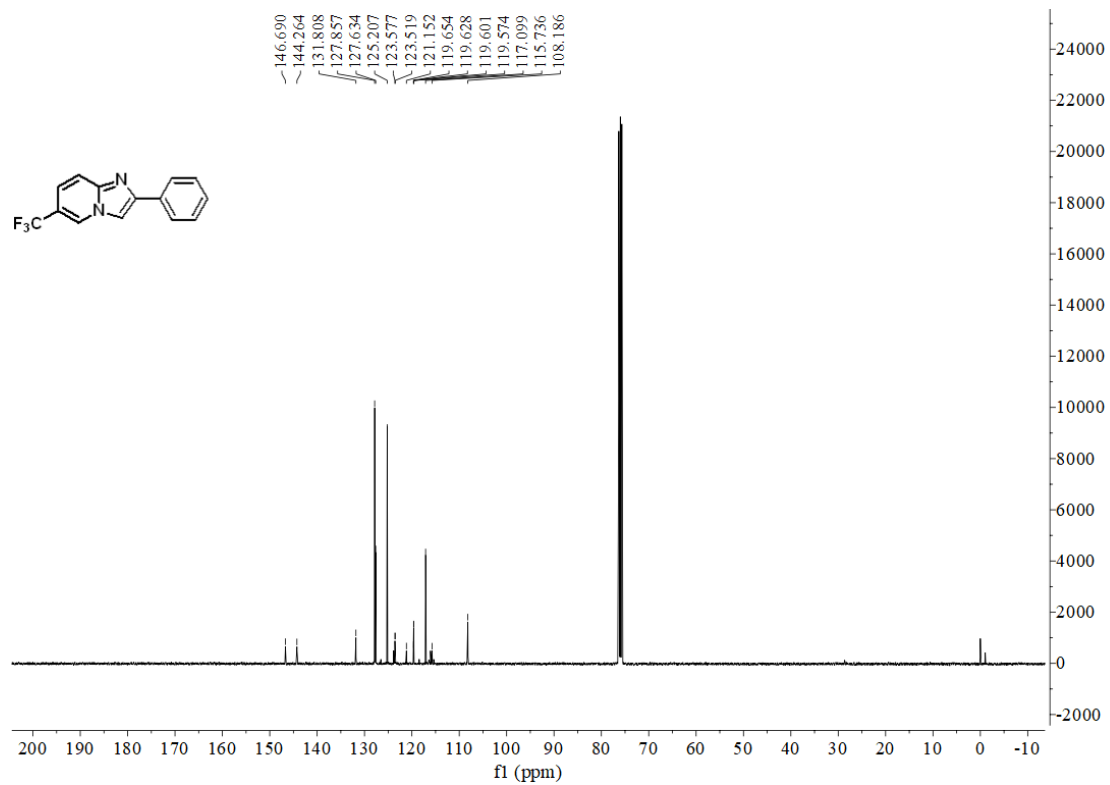

3ad

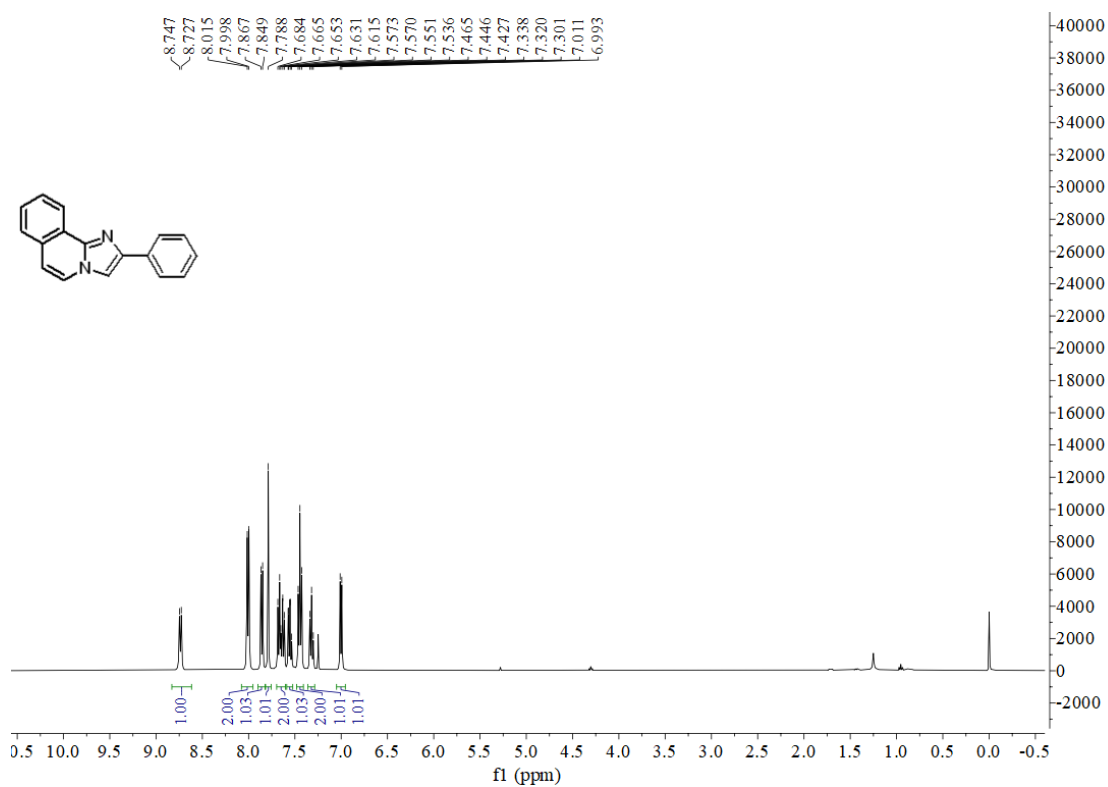

3ad

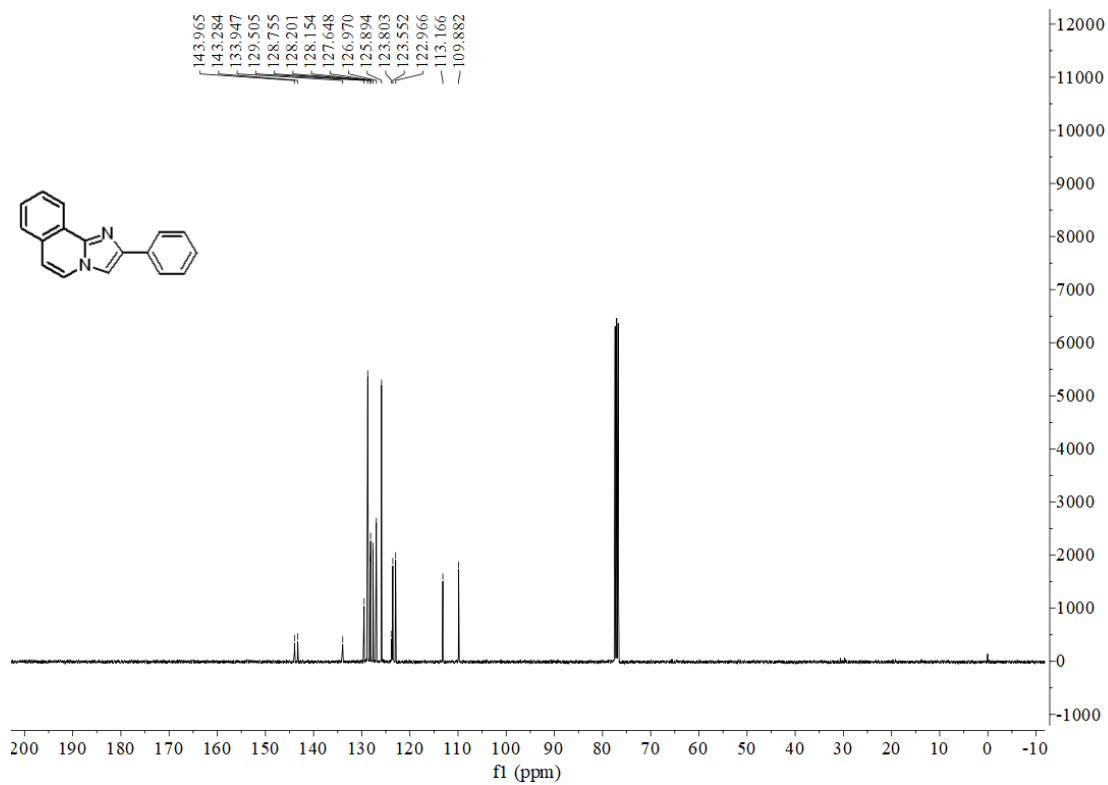

3ae

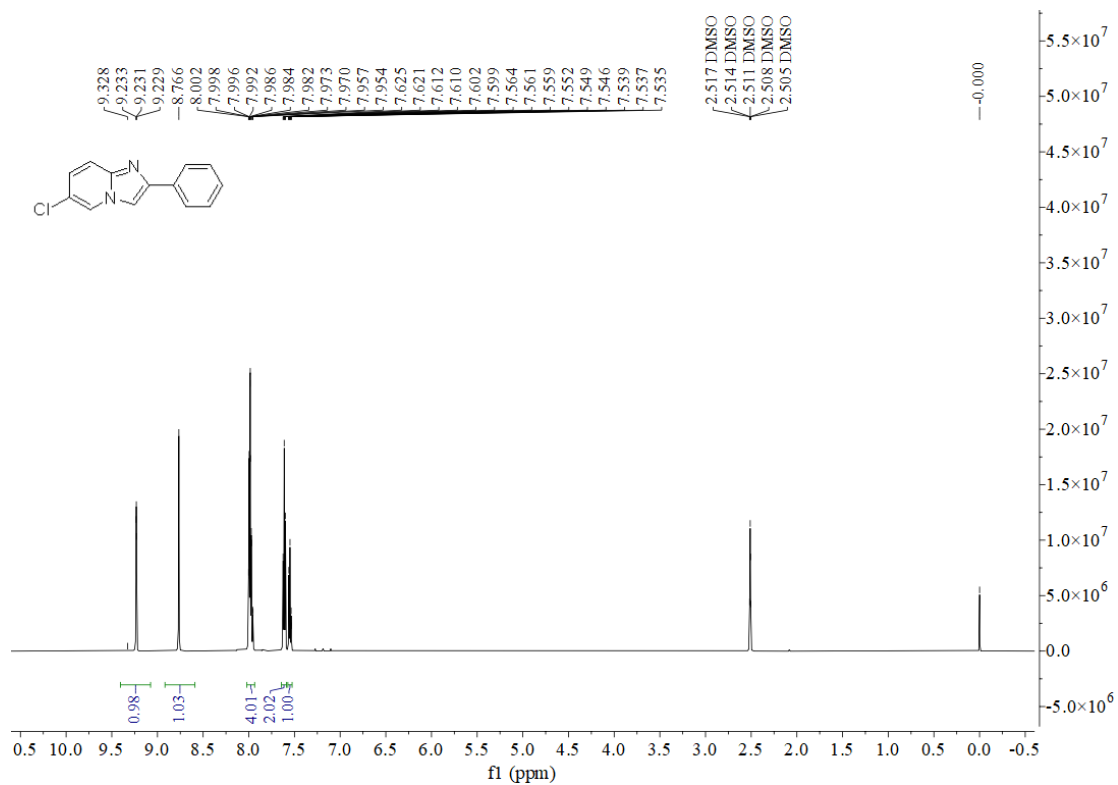

3ae

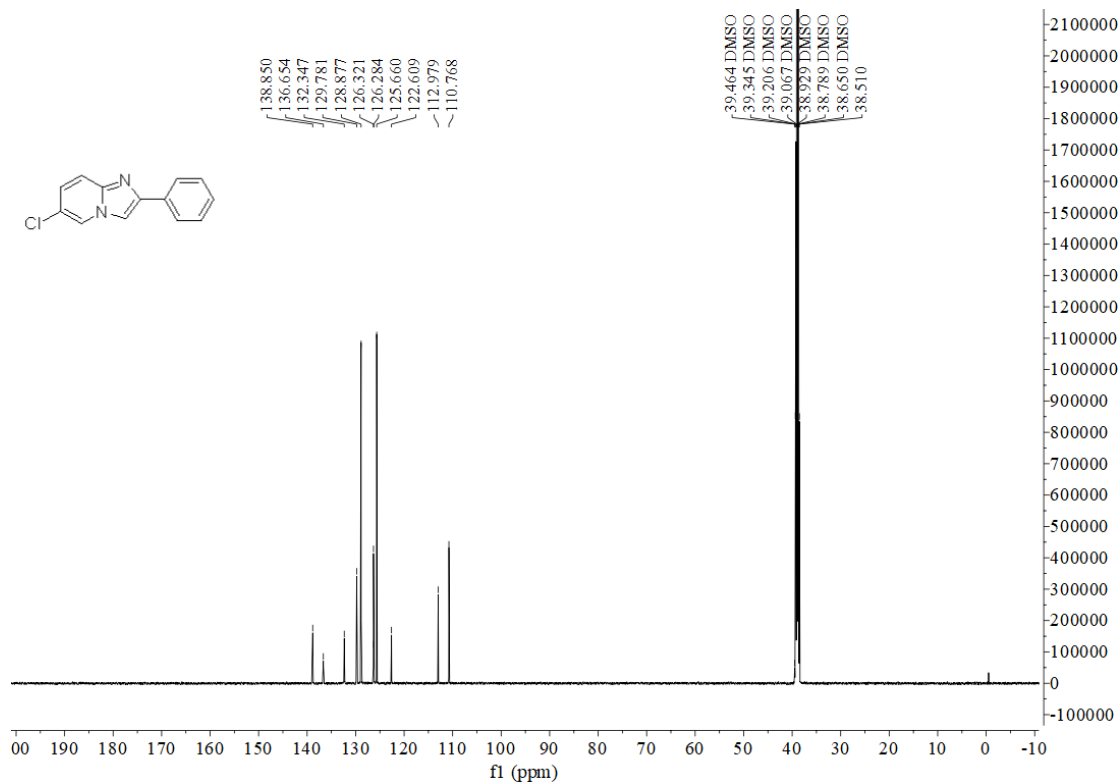

3af

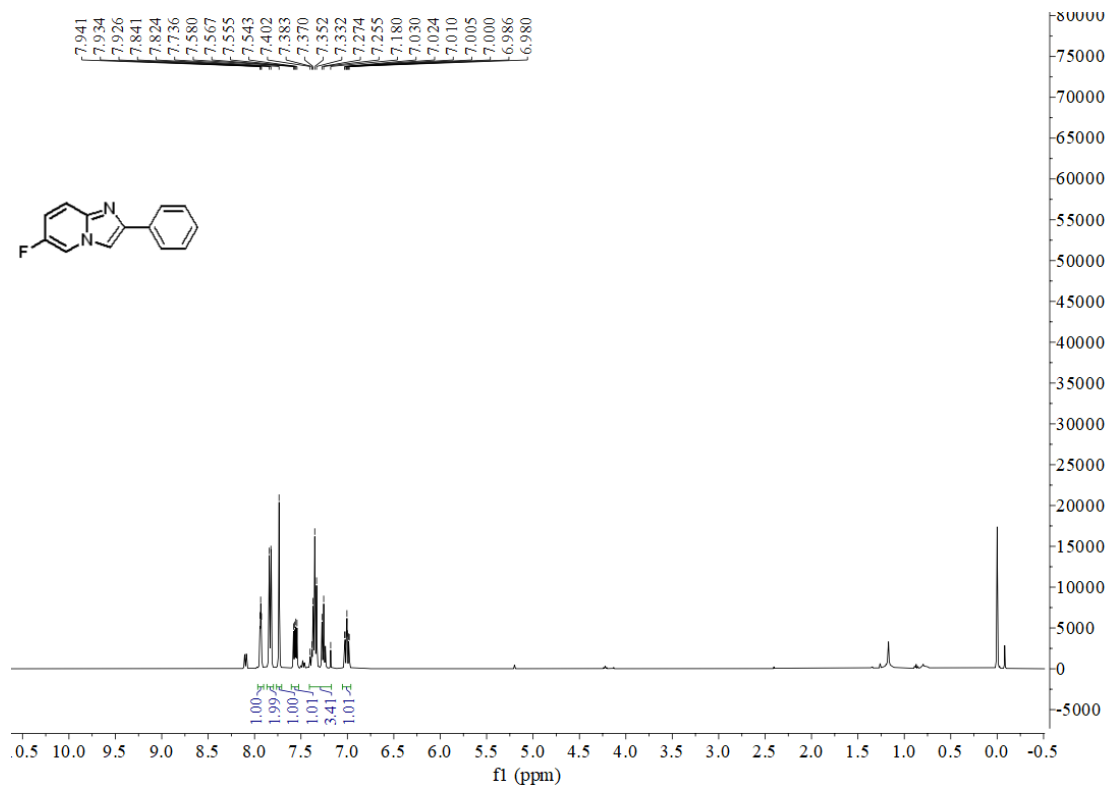

3af

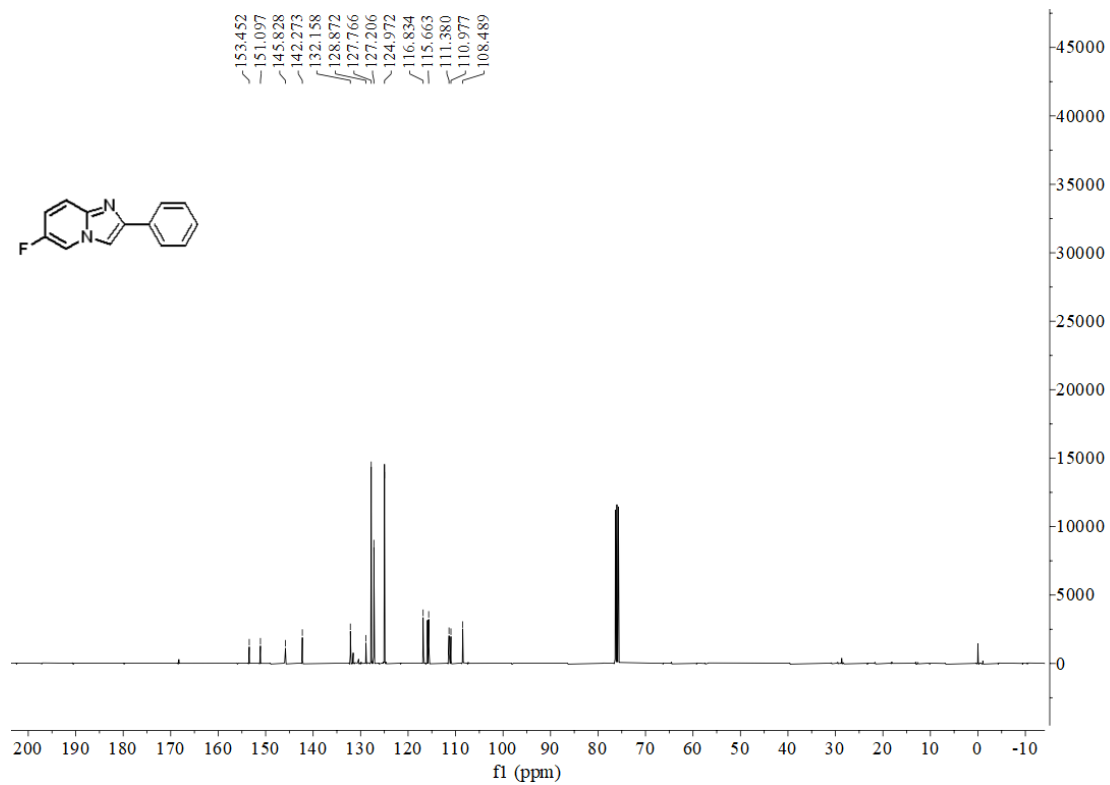



3ag

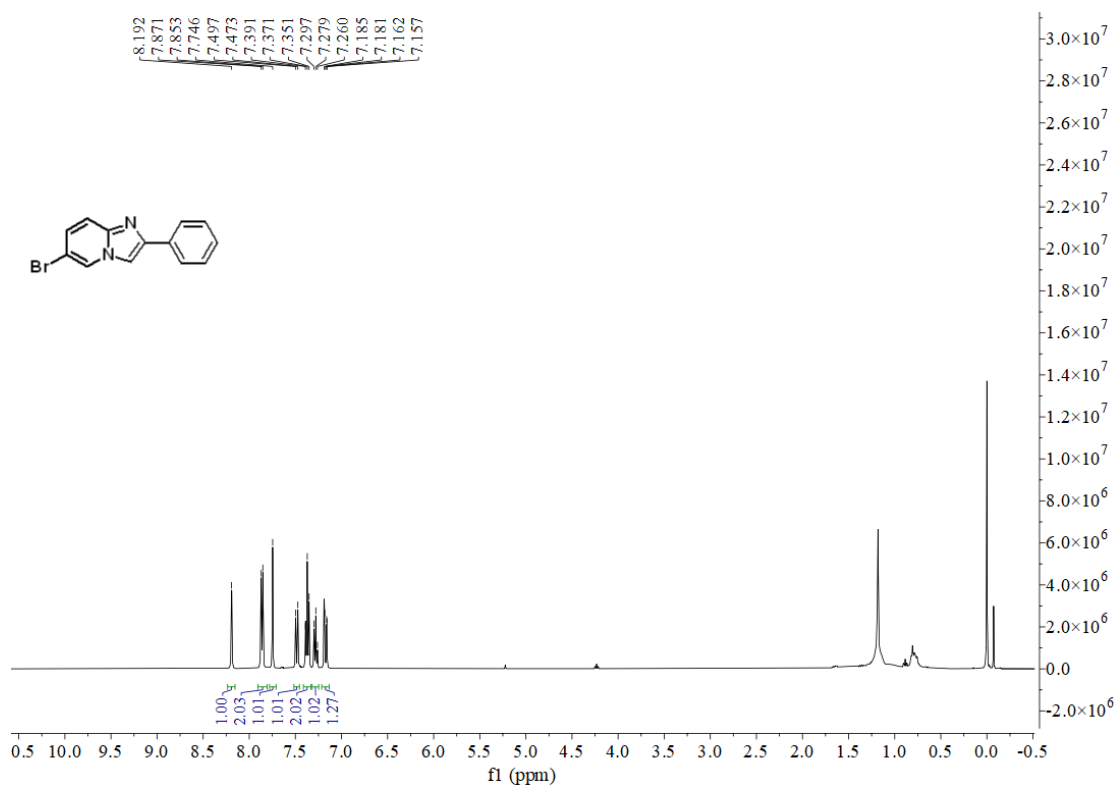

3ag

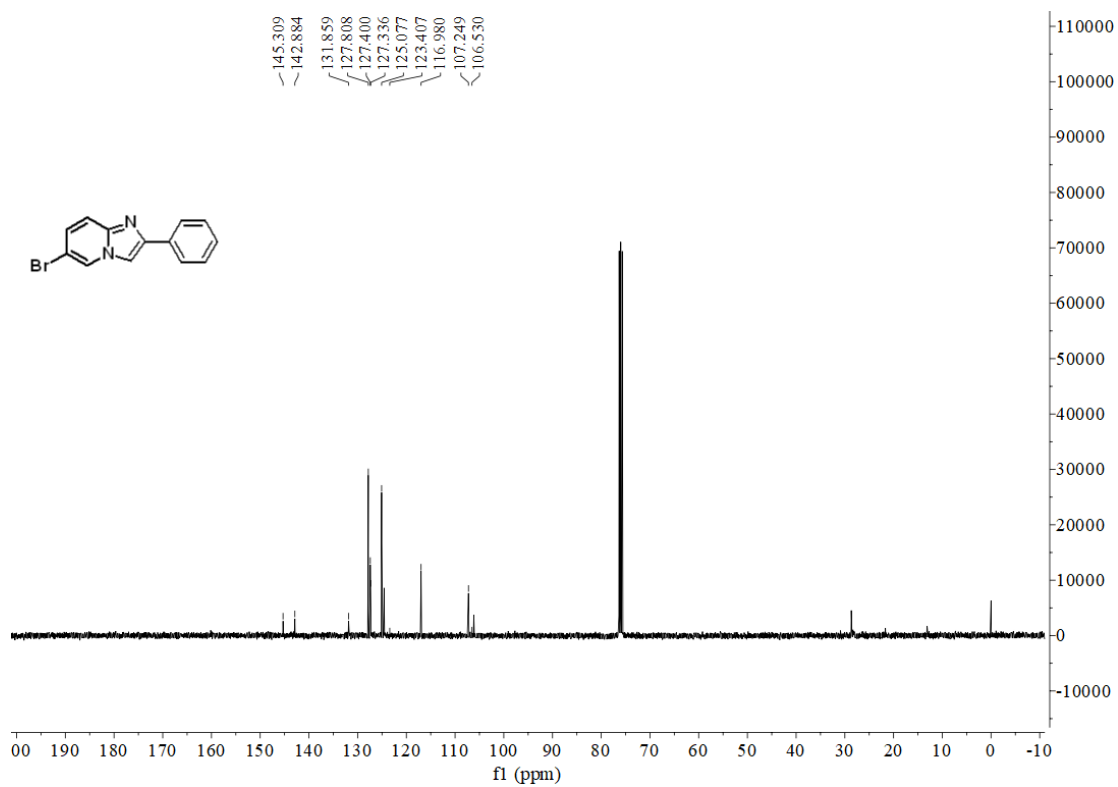

3ah

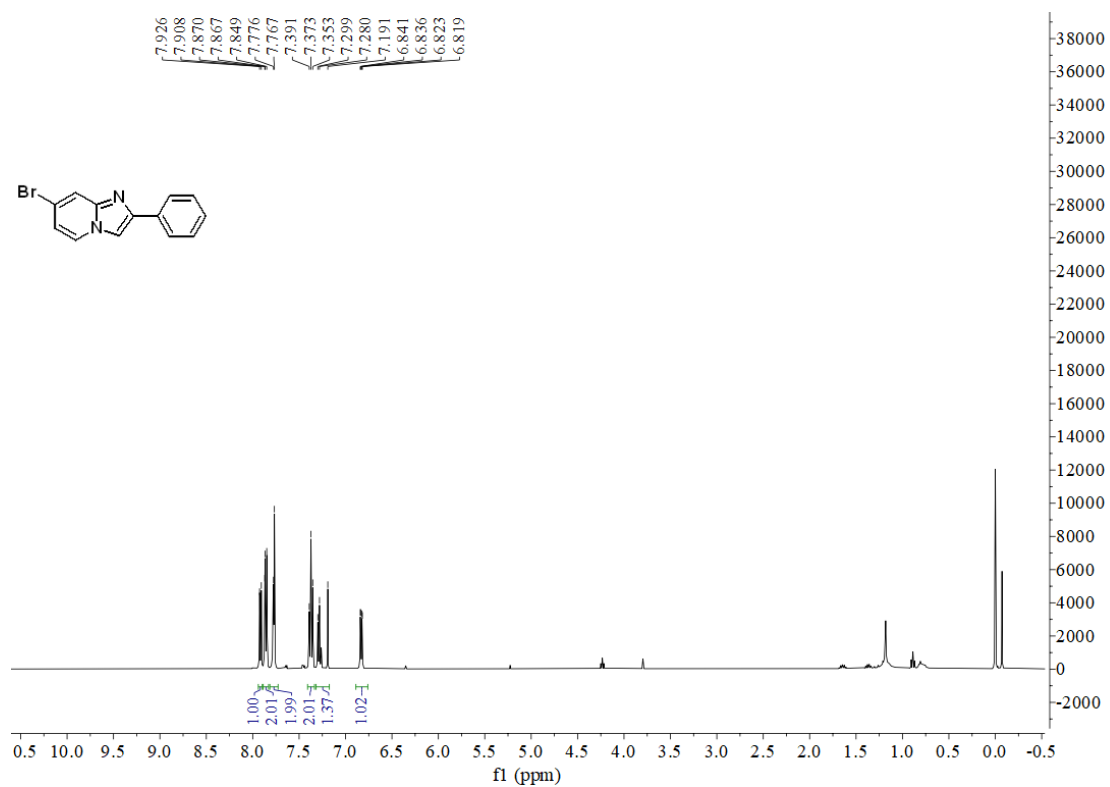

3ah

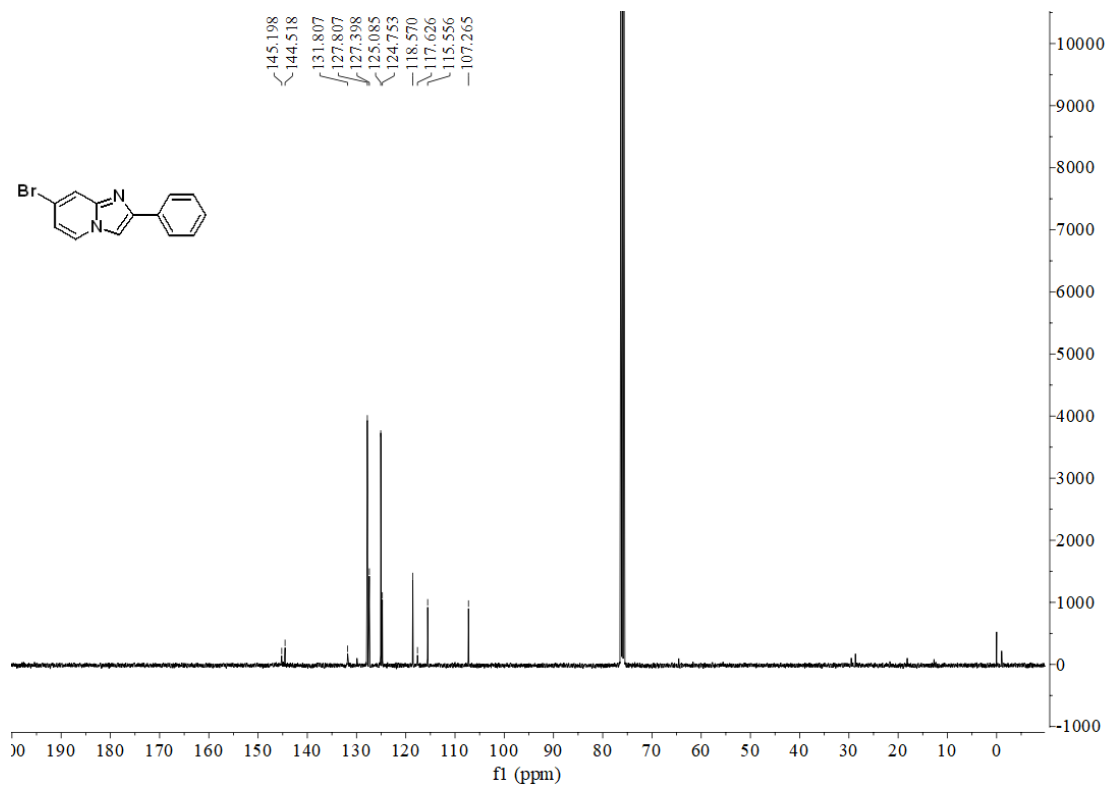

3ai

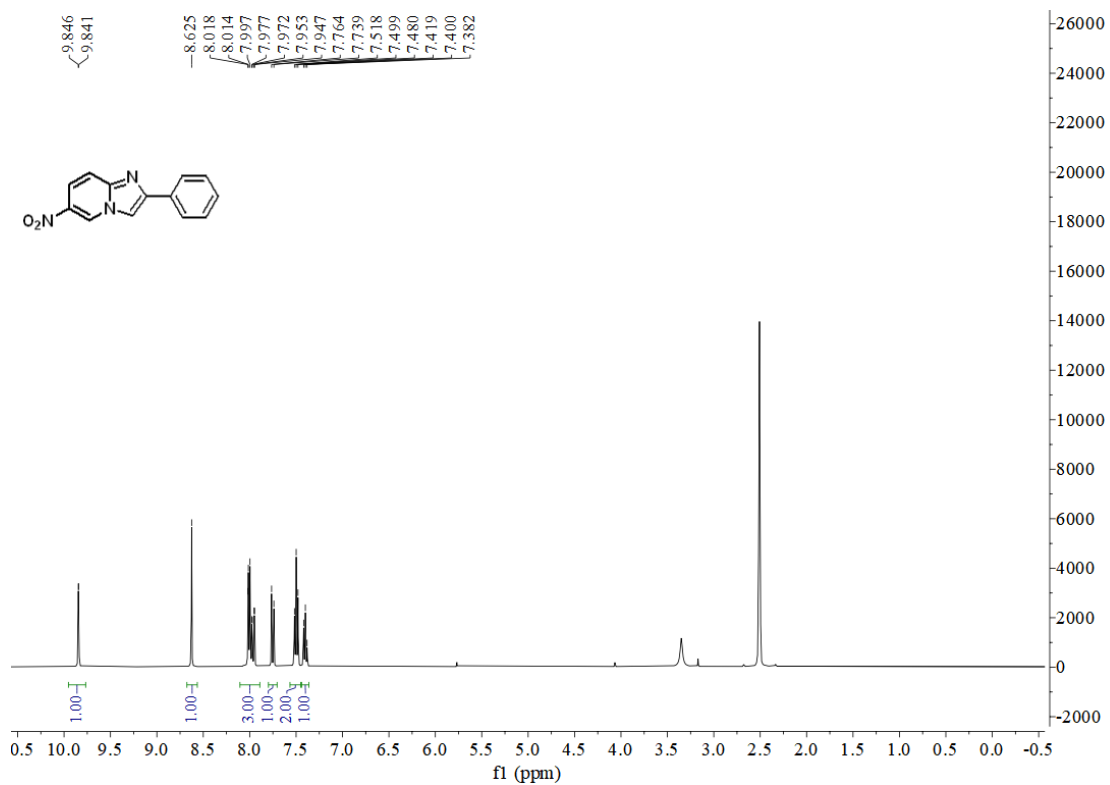

3ai

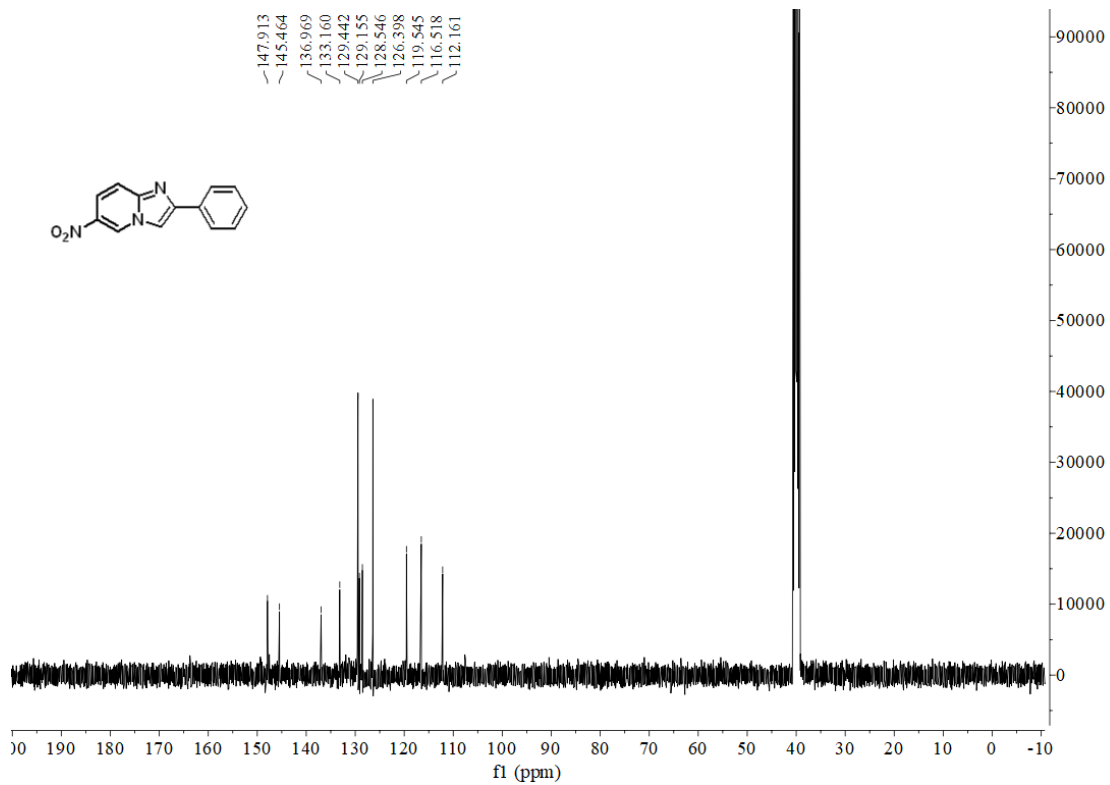

3aj

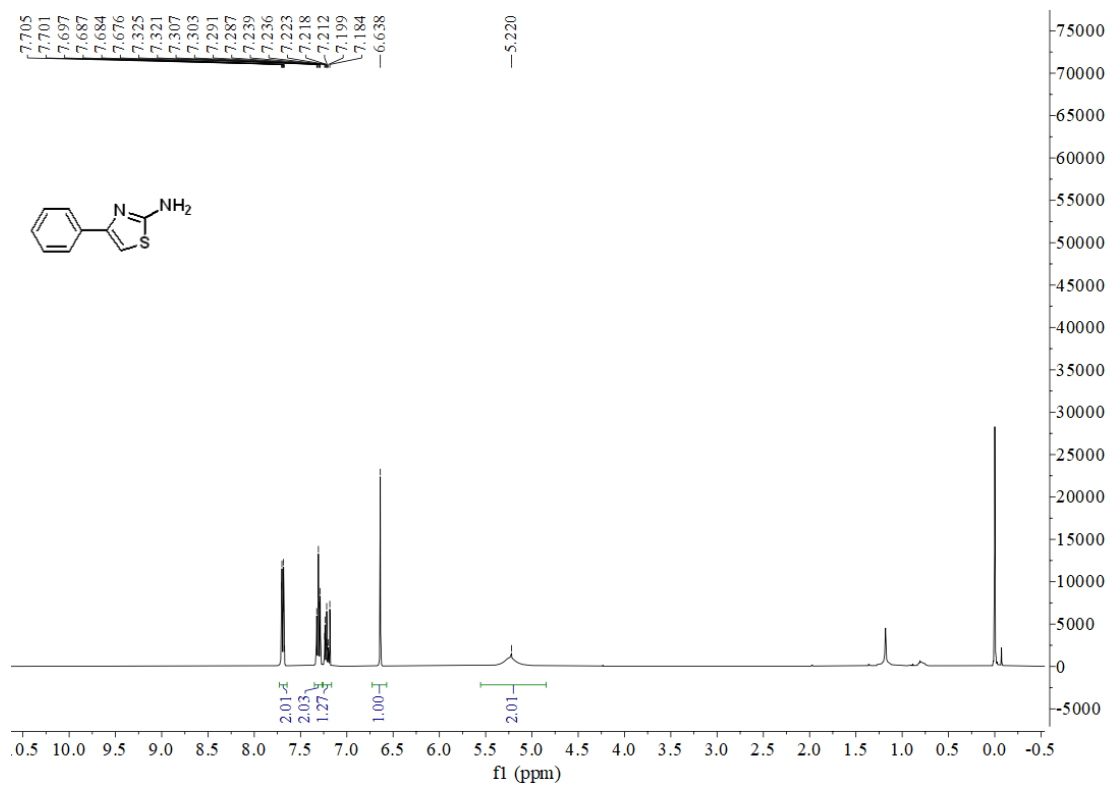

3aj

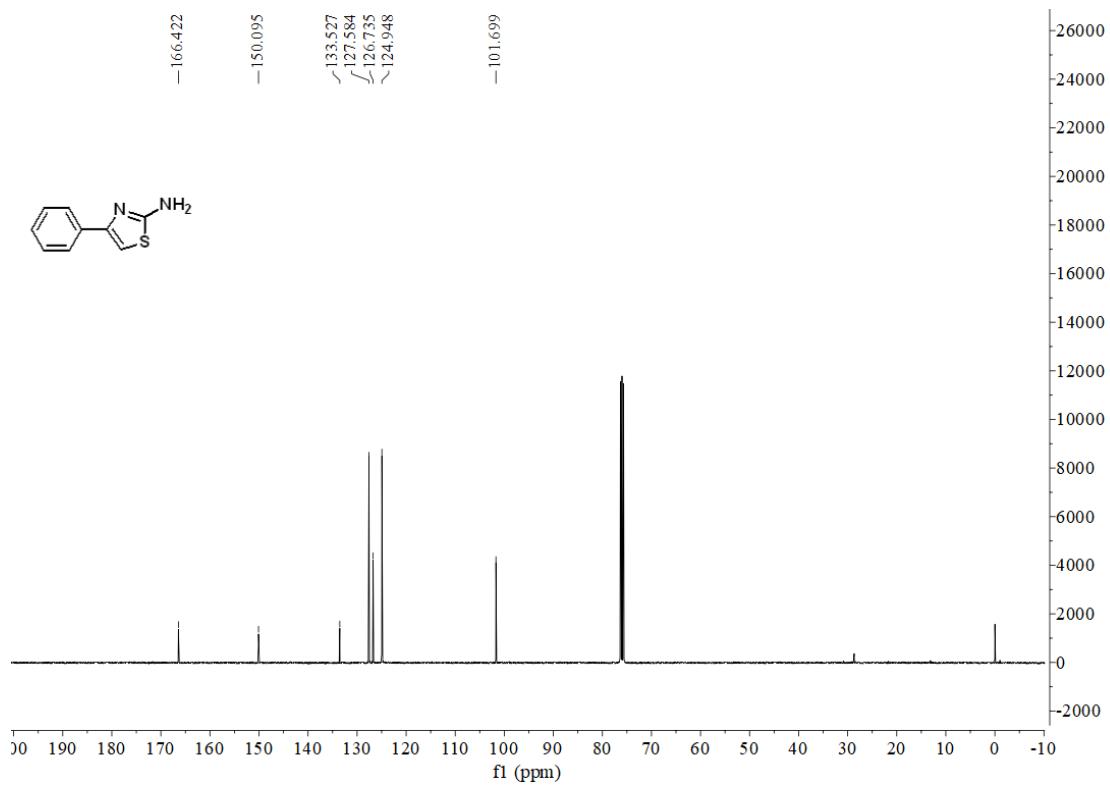

**3ak**

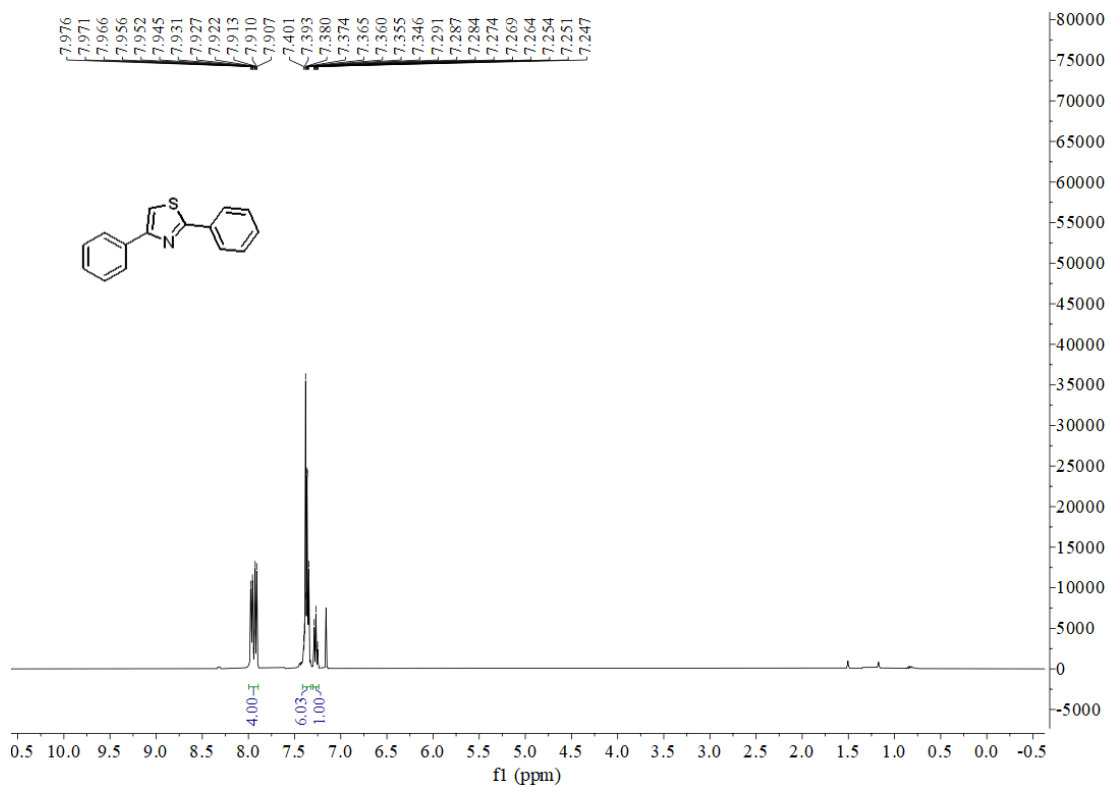

**3ak**

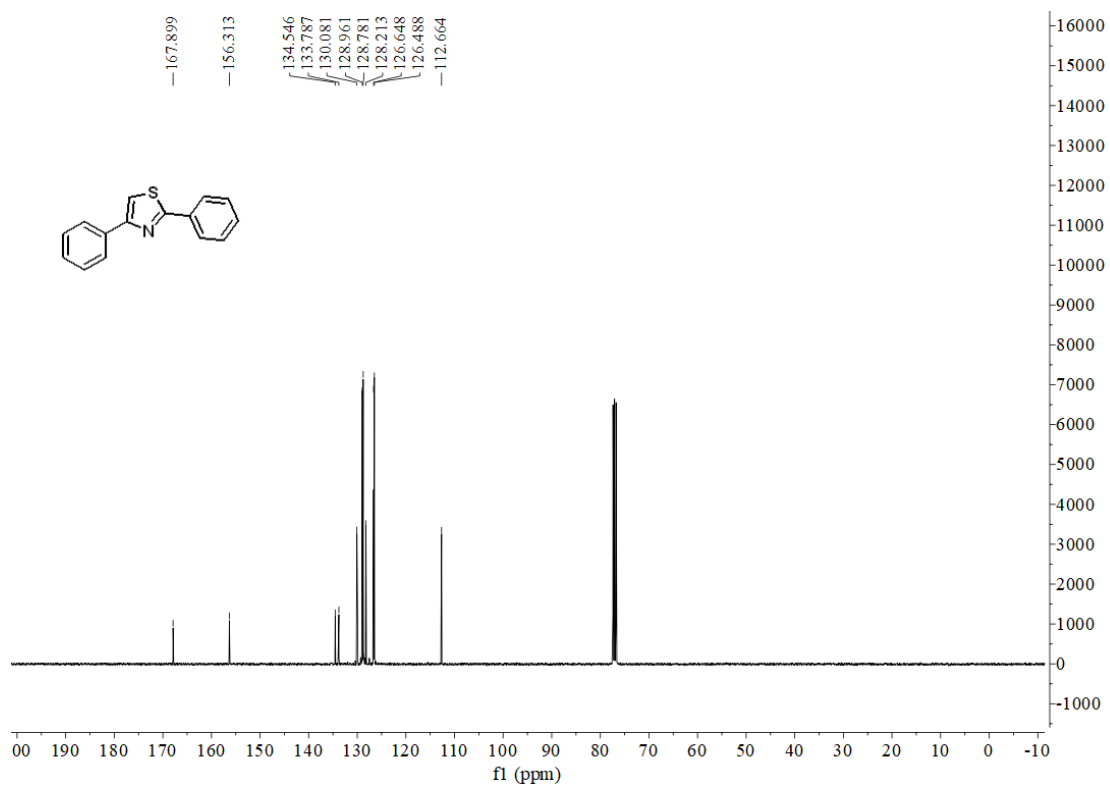

3al

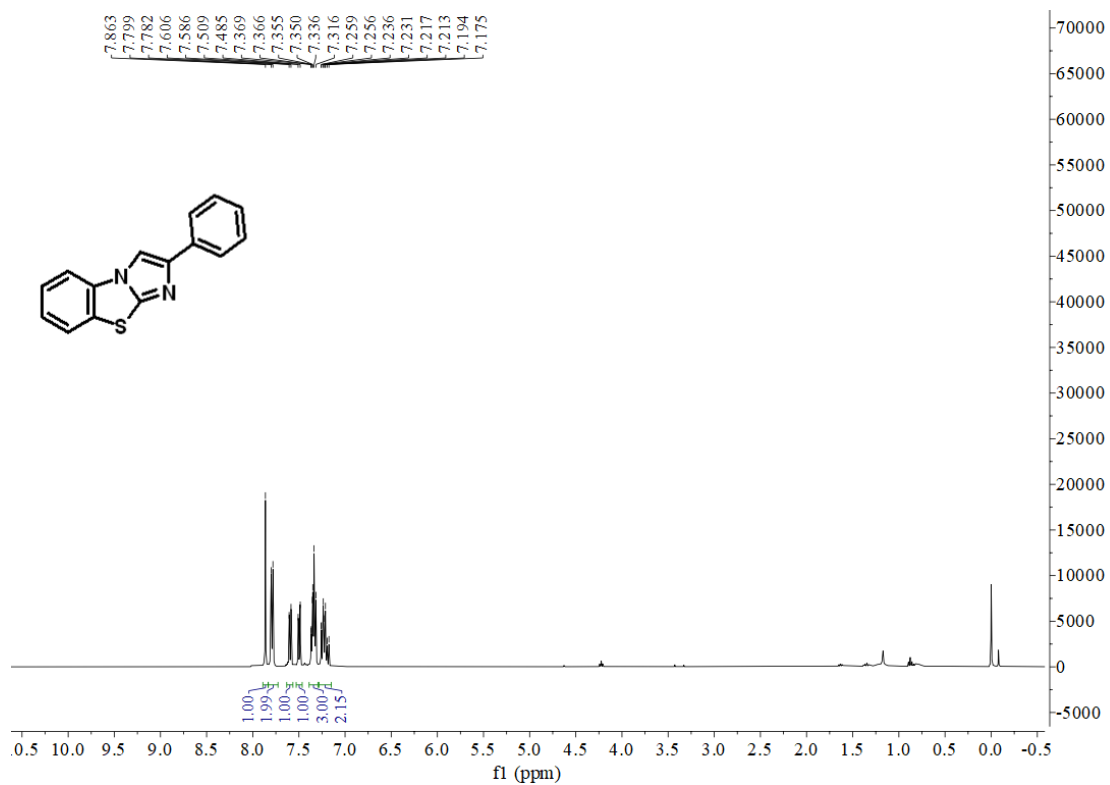

3al

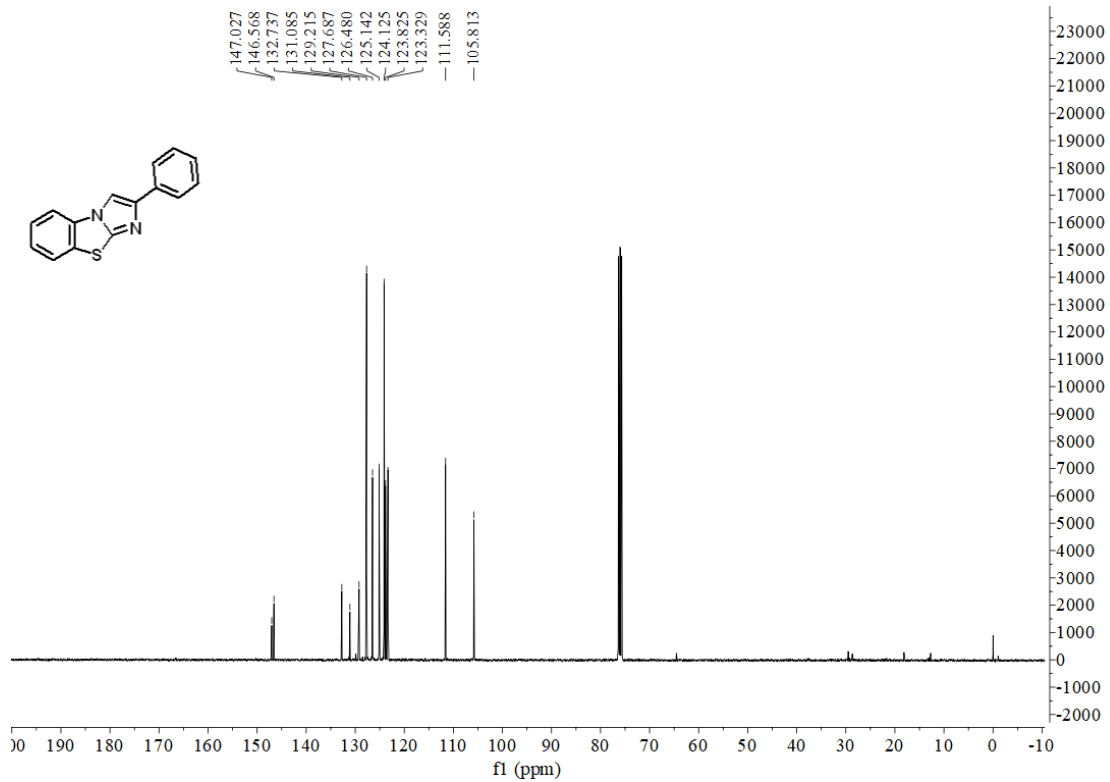

3am

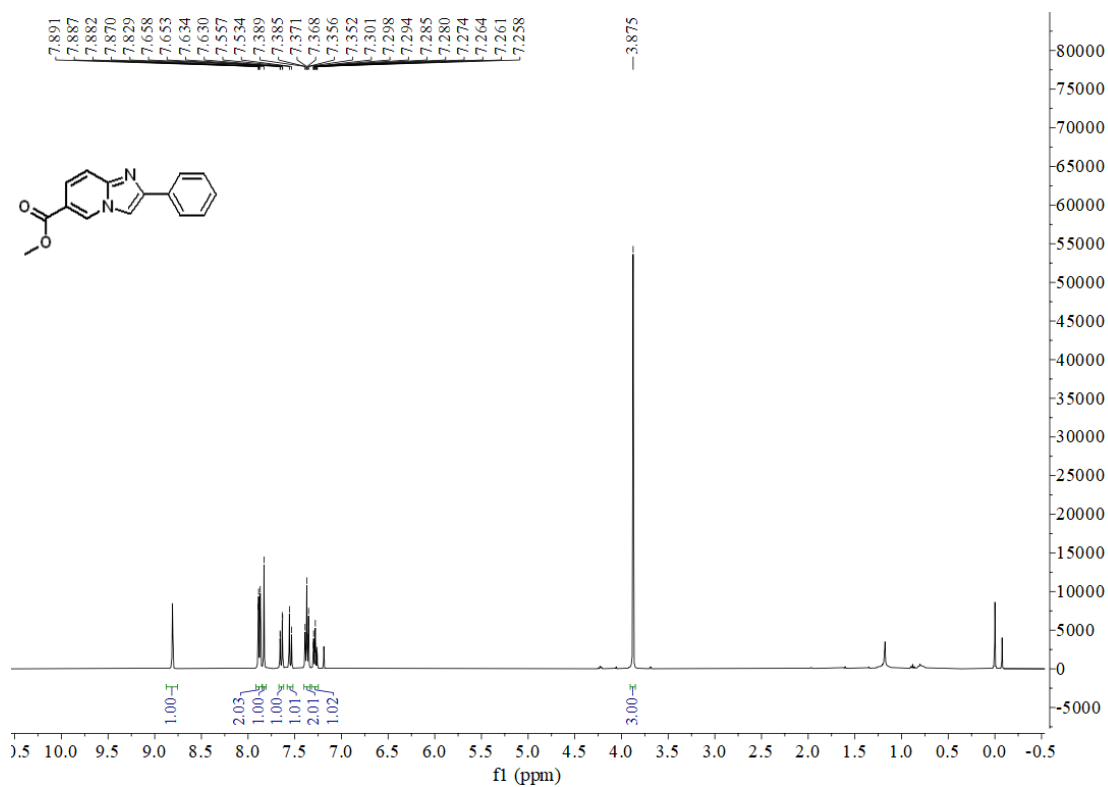

3am

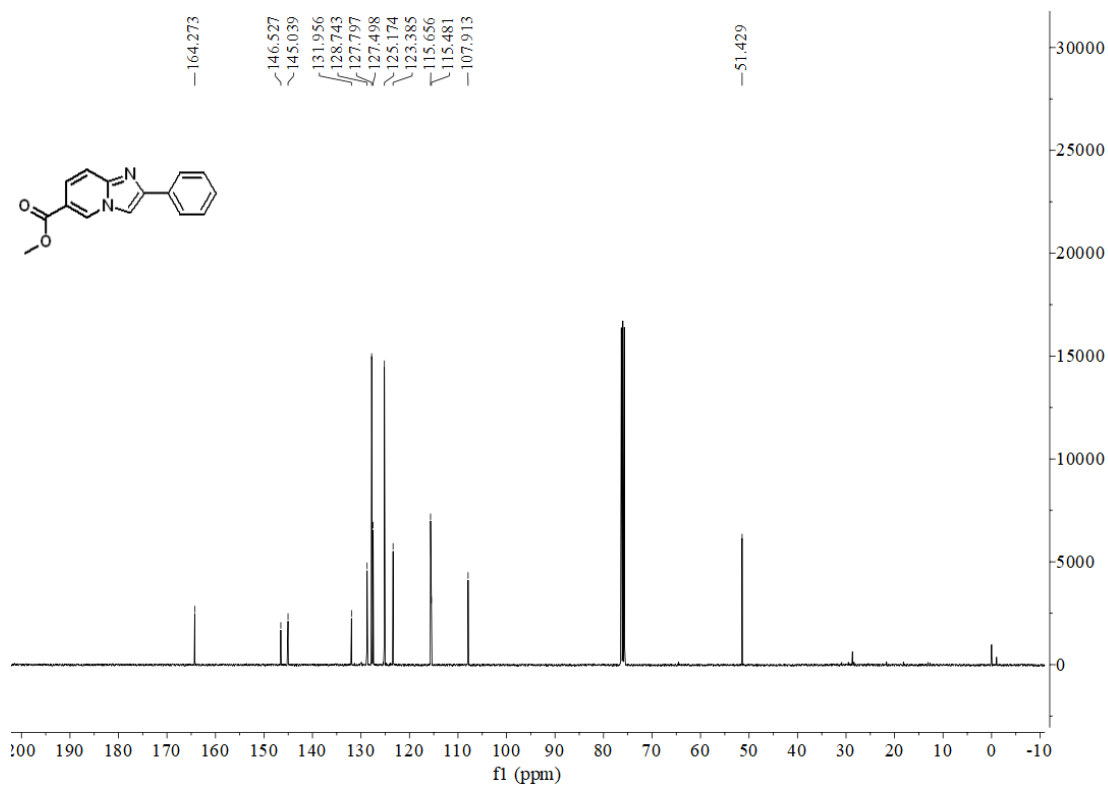

**3an**

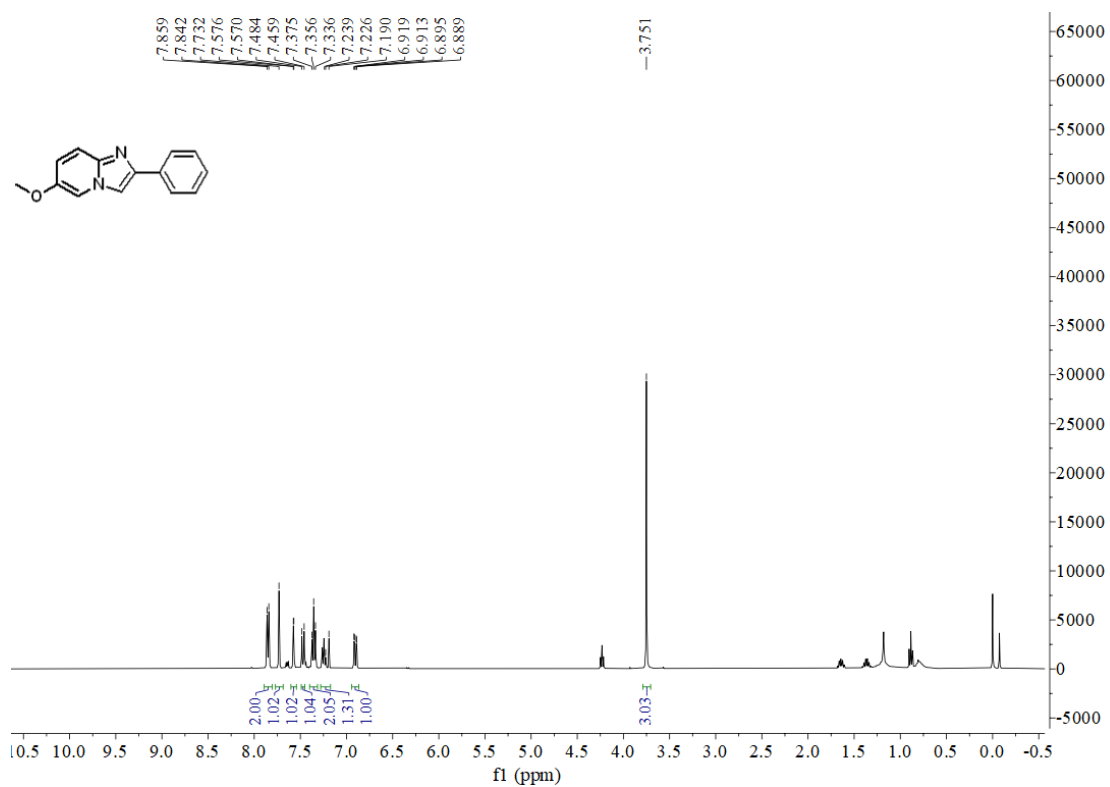

**3an**

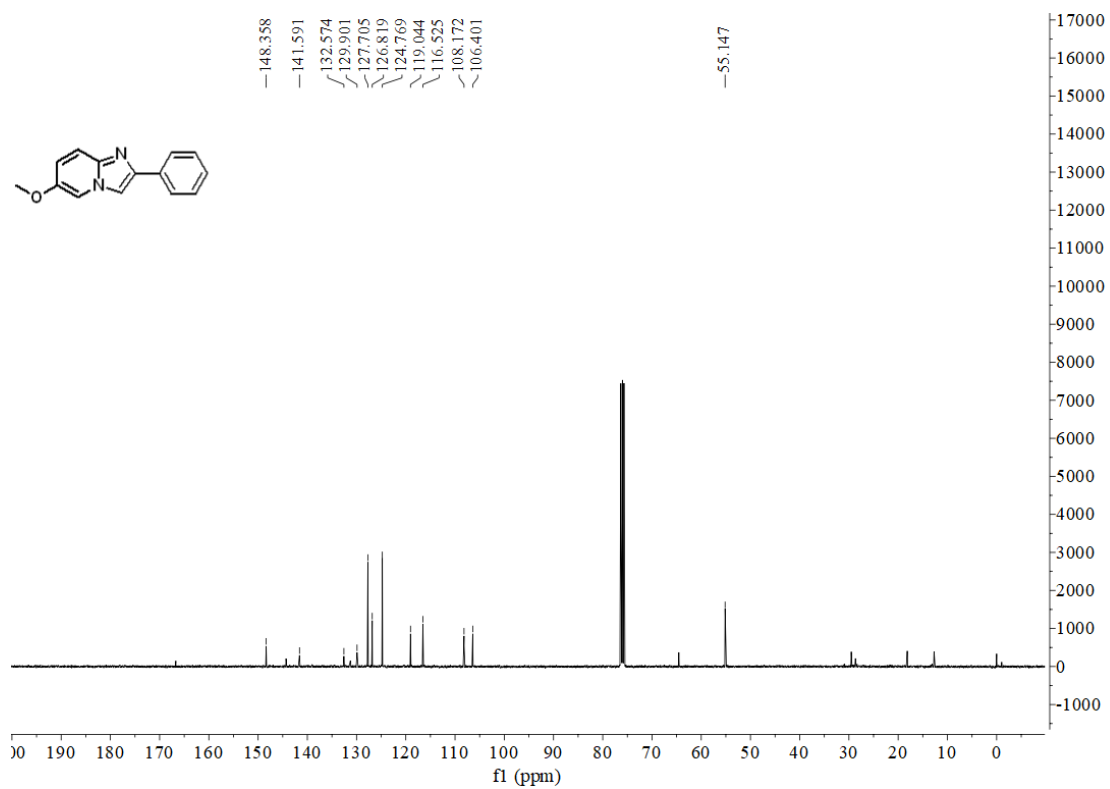



3ao

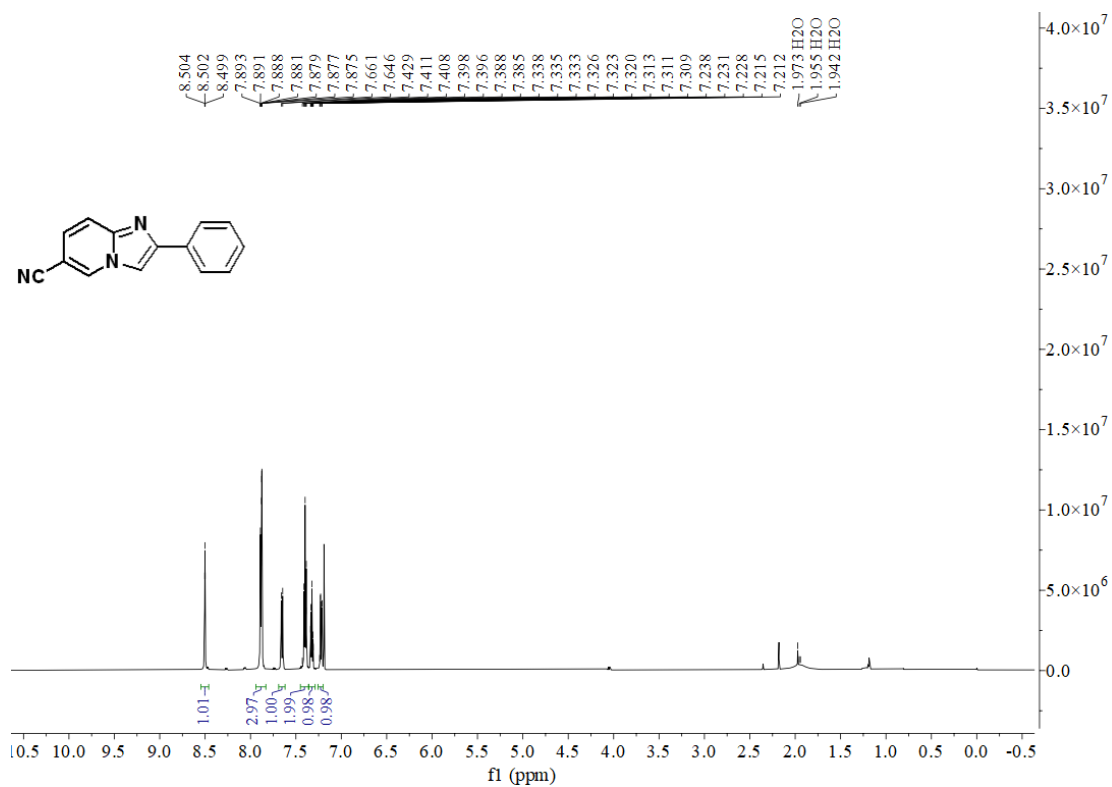

3ao

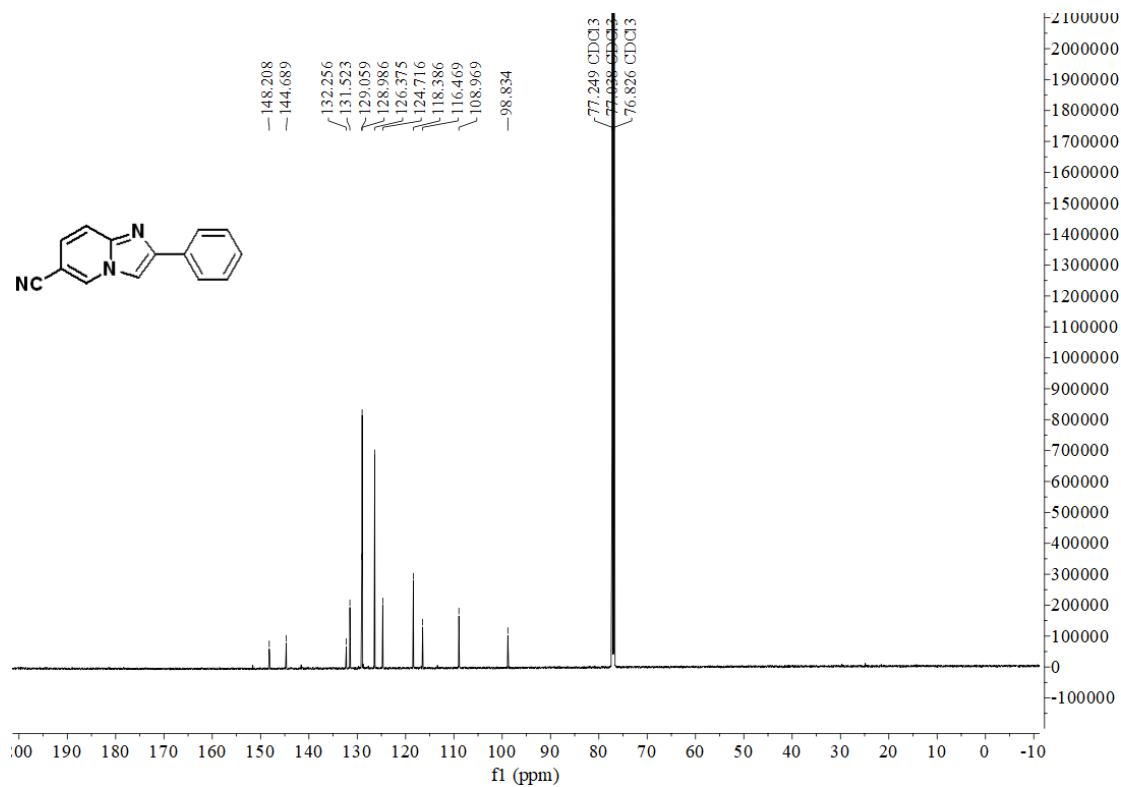

**3ap**

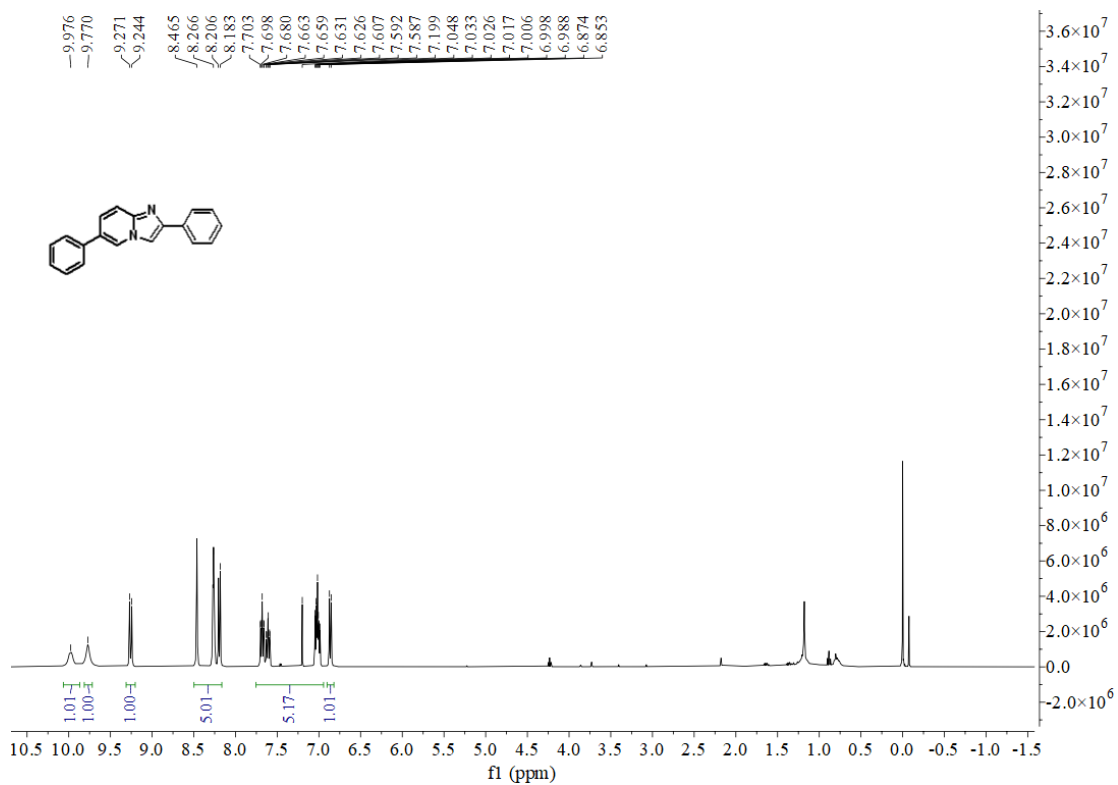

**3ap**

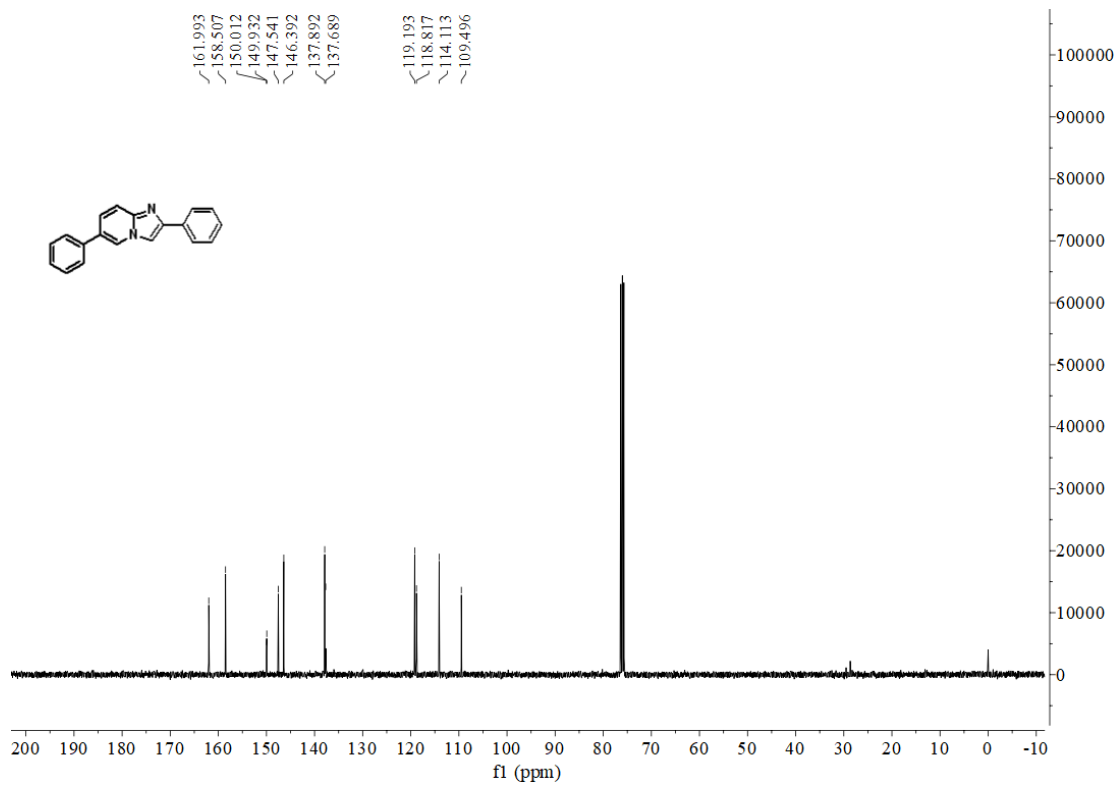

Supplement: d1ra07438e1.pdf [file d1ra07438e1.pdf]
